# Supplementary material
Source: PubMed Central journal article supplement (PMC3319874)
Supplement: NIHMS306397-supplement-1_si_001.pdf [file NIHMS306397-supplement-1_si_001.pdf]

## **Supporting Information**

### **Organizing DNA Origami Tiles Into Larger Structures Using Pre-formed Scaffold Frames**

Zhao Zhao, Yan Liu, Hao Yan  
Department of Chemistry and Biochemistry, and The Biodesign Institute,  
Arizona State University, Tempe, AZ 85287

## Experimental Materials and Methods

**Materials:** All DNA staple strands were purchased from Integrated Technologies, Inc. (www.IDTDNA.com) in the format of 96-well plates and desalted with concentrations normalized to 100  $\mu$ M. Single stranded M13mp18 viral DNA and  $\Phi$ X 174 DNA were purchased from New England Biolabs, Inc. (NEB, Catalog number: N4040S and N3023S). All DNA strands were used without further purification.

**Assembly Procedure:** 1) Each individual DNA origami staple tile was assembled by mixing M13mp18 DNA (10 nM) with the corresponding staple strands with a 1:5 molar ratio in 1 $\times$ TAE-Mg<sup>2+</sup> buffer (pH 8.0, 20mM Tris, 2 mM EDTA, 12.5 mM Mg(OAc)<sub>2</sub>). The final volume of each reaction was 100  $\mu$ L. The oligo mixtures were annealed in a PCR thermocycler, cooled from 90°C to 70°C at a rate of -0.5°C/min and subsequently cooled from 70°C to 4°C at a rate of -0.1°C/min. Following the anneal, the structures were purified with 100 kD MWCO Microcon centrifugal filter devices (Amicon, Catalog number: UFC510096).

2) Origami super-structures were assembled in a two-step annealing process. Individual origami staple tiles bearing unique single stranded probes along two edges at designed positions were annealed in separate tubes as described above and subsequently purified with 100 KD MWCO Microcon centrifugal filters to remove any excess staple strands. At the same PhiX174 scaffold strand (10 nM) and a complete set of bridges strands were mixed in a separate tube (molar ratio 1:10) and annealed from 90 °C to 4 °C over 10 h in 1 $\times$ TAE-Mg<sup>2+</sup> buffer. The two solutions were mixed together (molar ratio 1.5:1 or 2:1) and annealed from 45 °C to 4 °C at a rate of -2°C/h. The annealing cycle was repeated 10 times, and in each consecutive cycle the starting temperature was decreased by 0.5 °C from the prior cycle. The entire annealing program took approximately 100 hrs.

**Agarose gel electrophoresis:** The assembled products were loaded into agarose gels (0.3% agarose in 1 $\times$ TAE-Mg<sup>2+</sup> aqueous buffer, containing 0.5  $\mu$ g/mL ethidium bromide) and subject to gel electrophoresis at 80V for one hour.

**AFM imaging:** The samples (2  $\mu$ L) were deposited onto freshly cleaved mica (Ted Pella, Inc.) and left to adsorb for 3 min. Buffer (1 $\times$ TAE-Mg<sup>2+</sup>, 400  $\mu$ L) was added on top of the sample and the sample was imaged in fluid tapping mode on a Pico-Plus AFM (Molecular Imaging, now Agilent Technologies) with SNL tips (Veeco Probes, Inc.).

**Figure S1.** Design of the triangular DNA origami staple tile. The red strand represents the M13 scaffold. The blue strands are the staple strands with arrows pointing to the 3' ends. The spacing between consecutive staple crossovers connecting neighboring parallel helices is 32 bps. The outermost helices are 384 bps or approximately 120 nm.

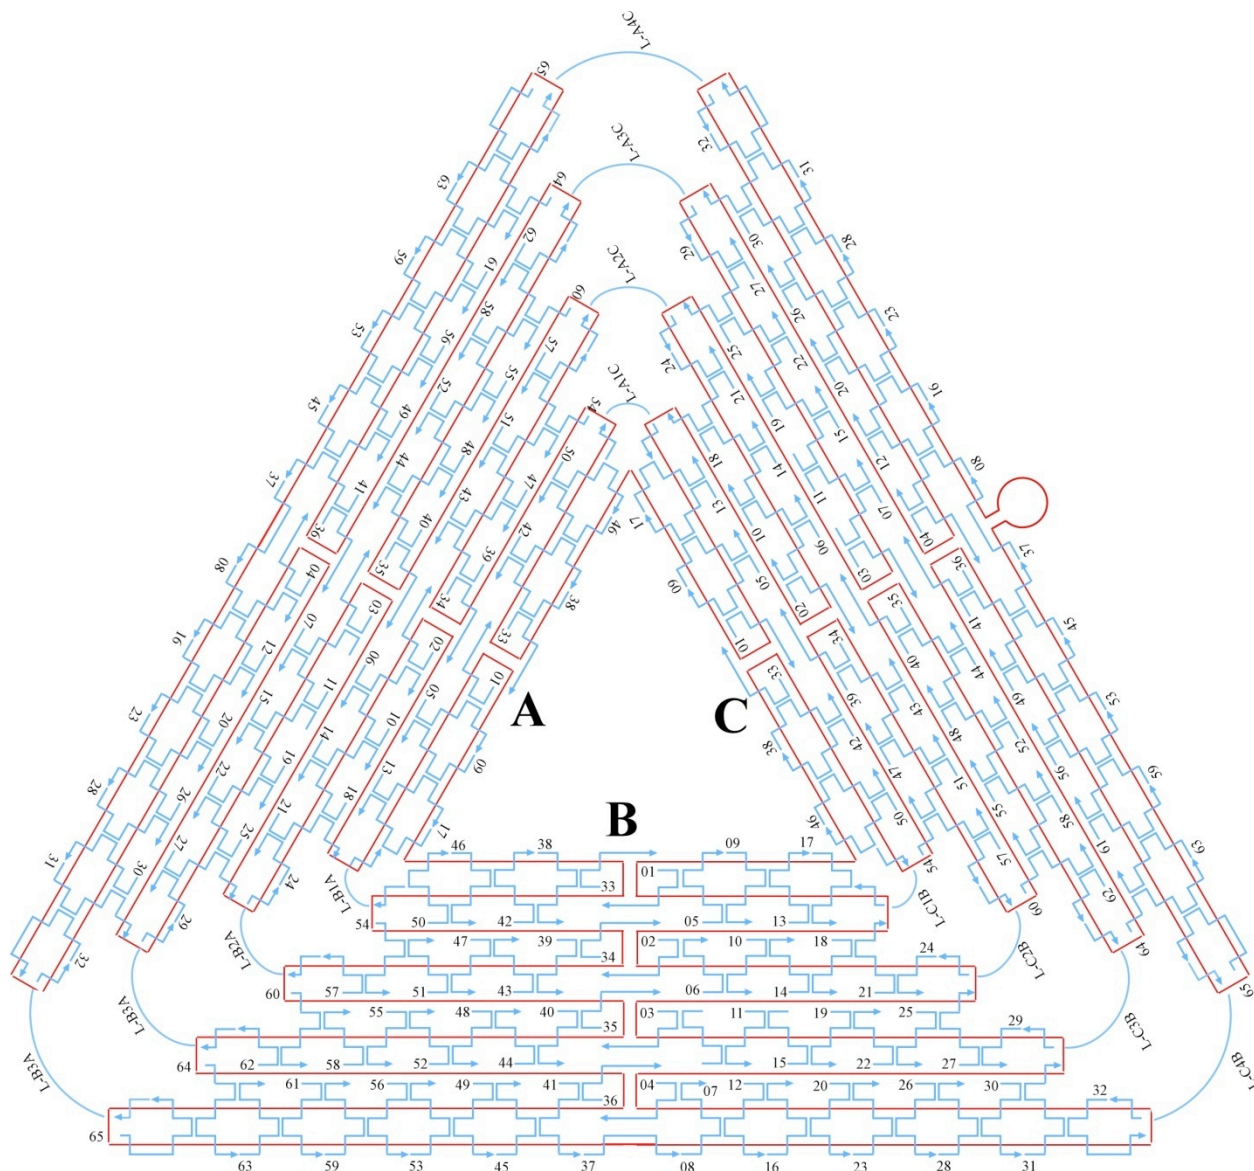

**Figure S2.** AFM image of the individual triangular shaped DNA Origami (the size of the image is 3.5  $\mu\text{m}$   $\times$  3.5  $\mu\text{m}$ )

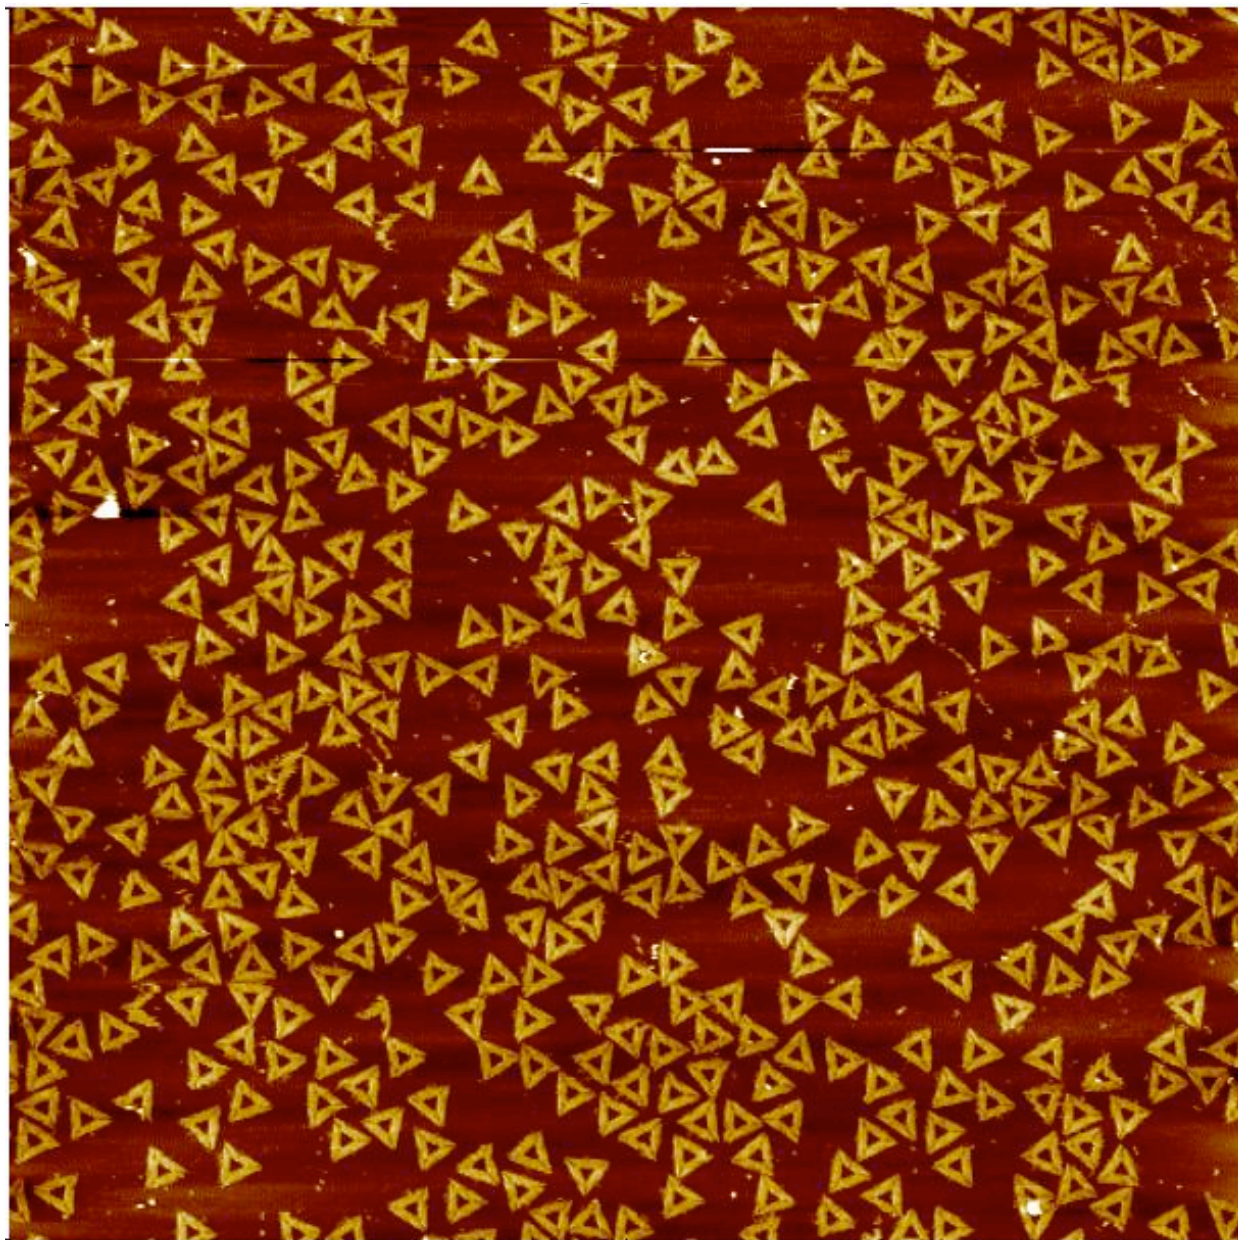

**Figure S3.** Agarose gel electrophoresis result for the triangular DNA Origami. (1.5% agarose gel)

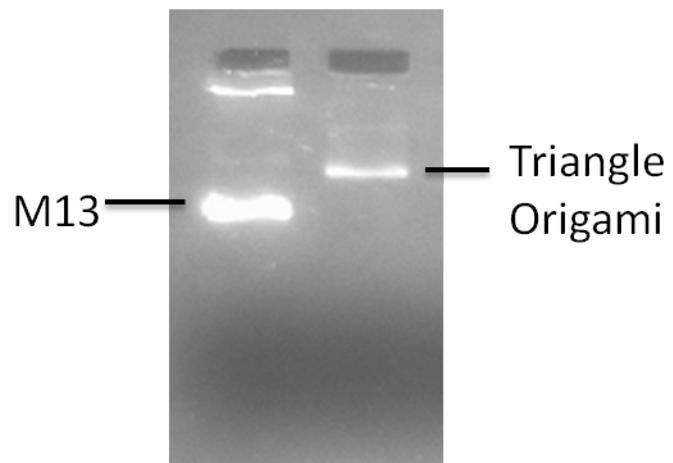

**Figure S4.** Design and AFM images of the triangular origami staple tile based super-structure using design 1 (the size of the AFM images are 5  $\mu\text{m} \times 5 \mu\text{m}$ )

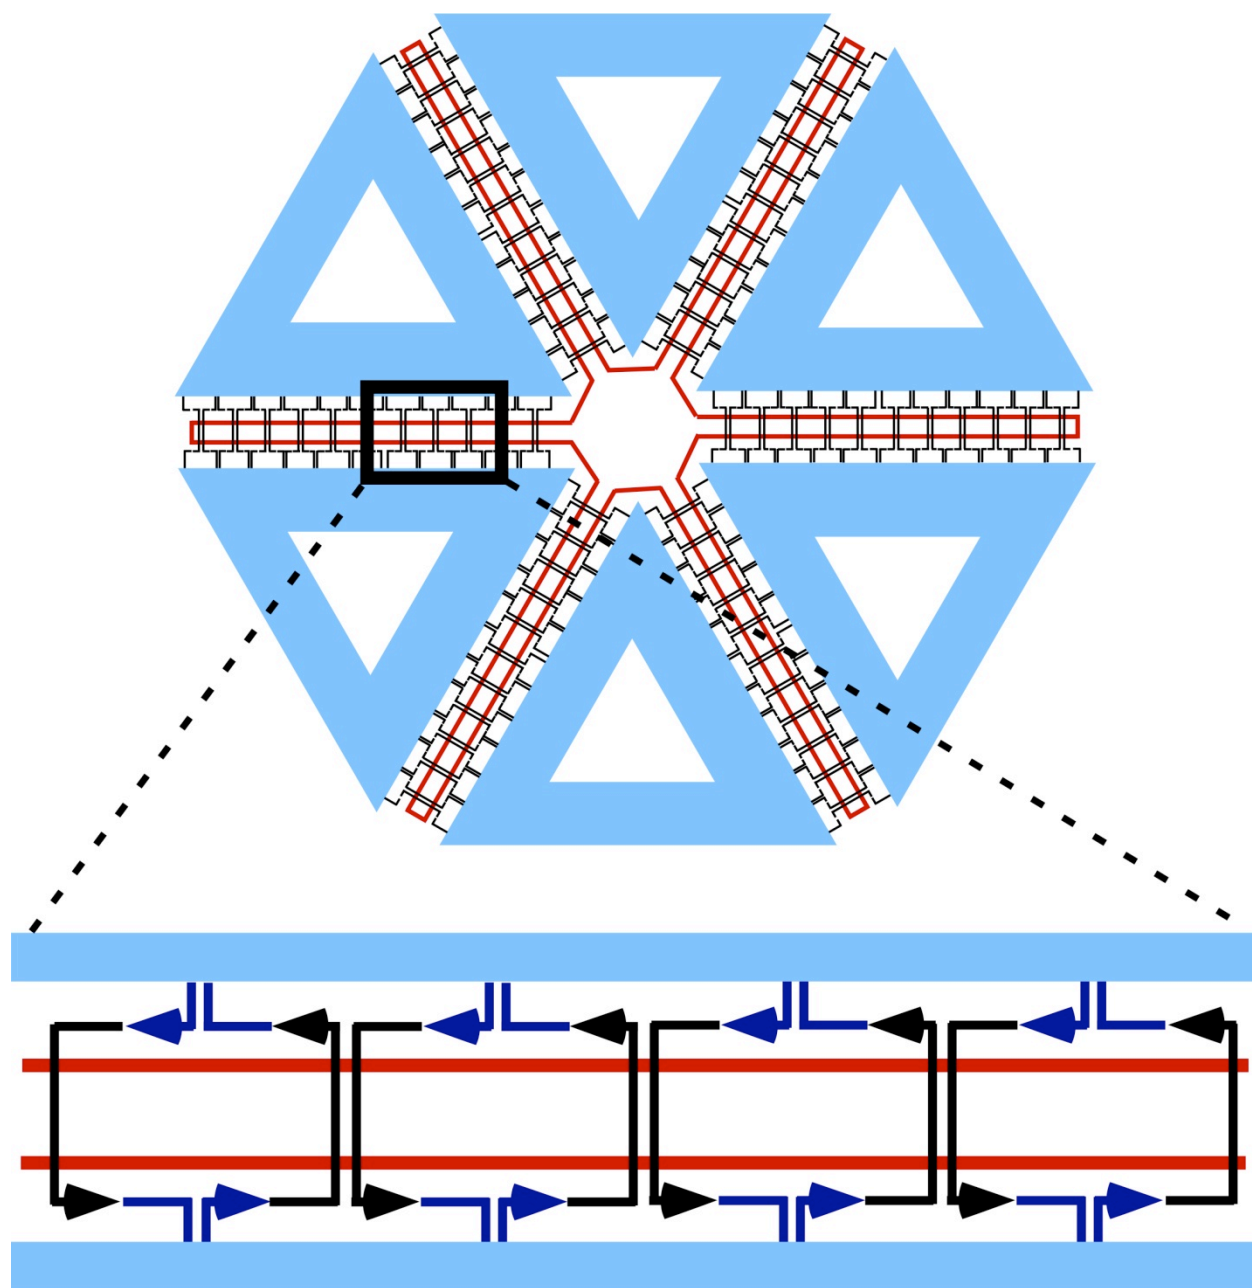

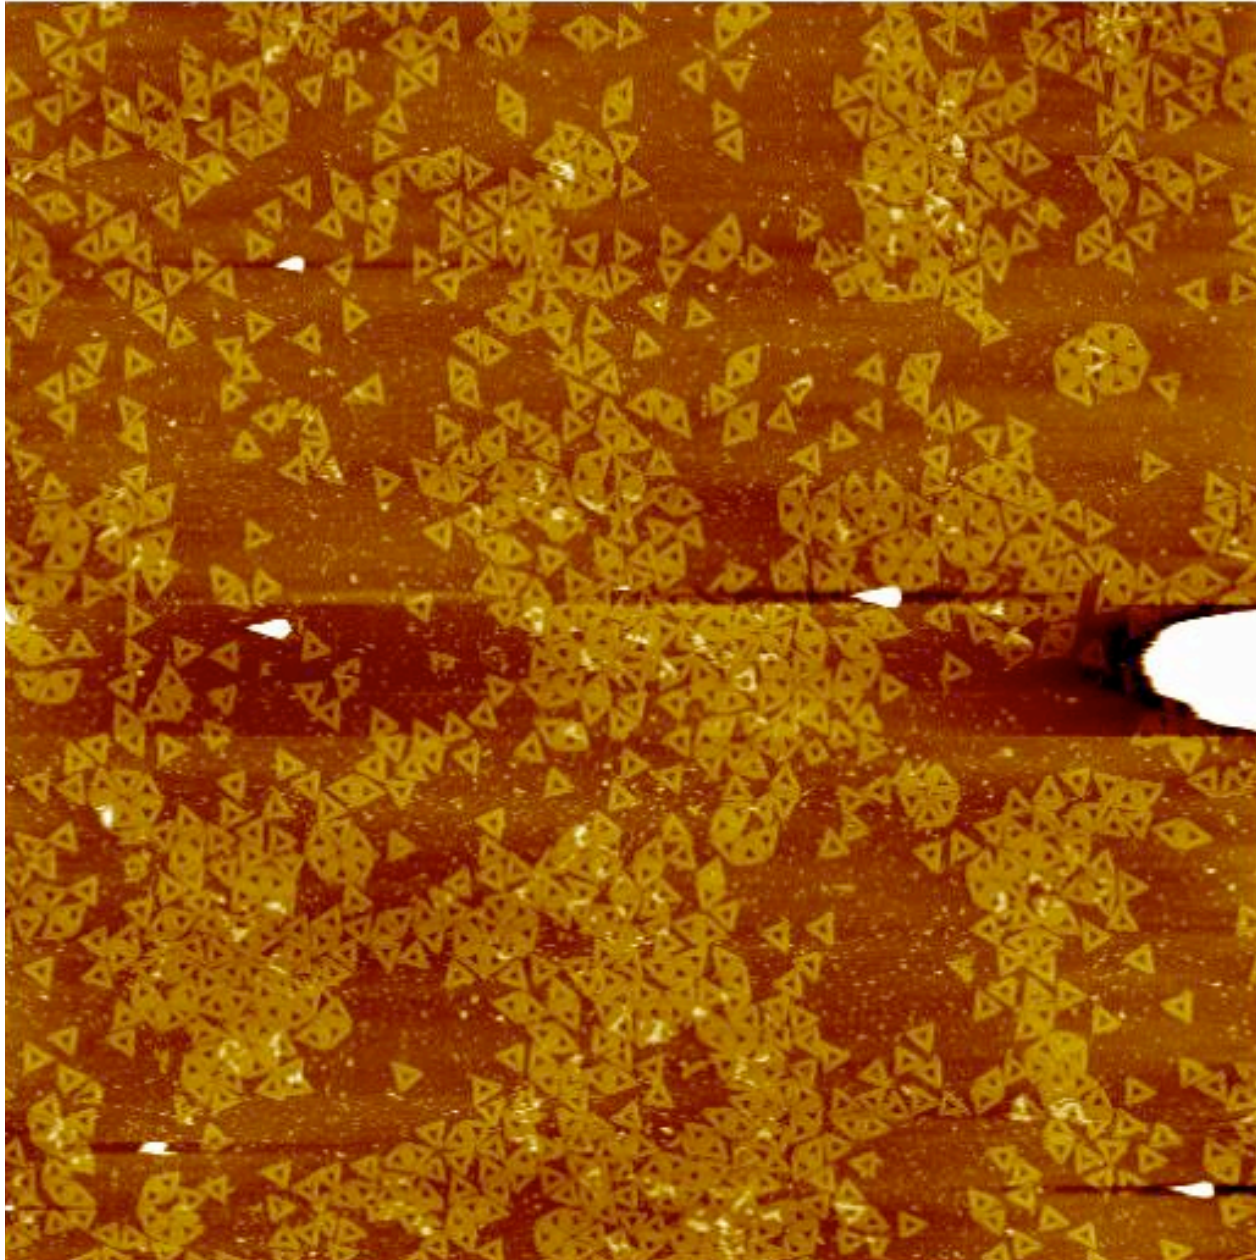

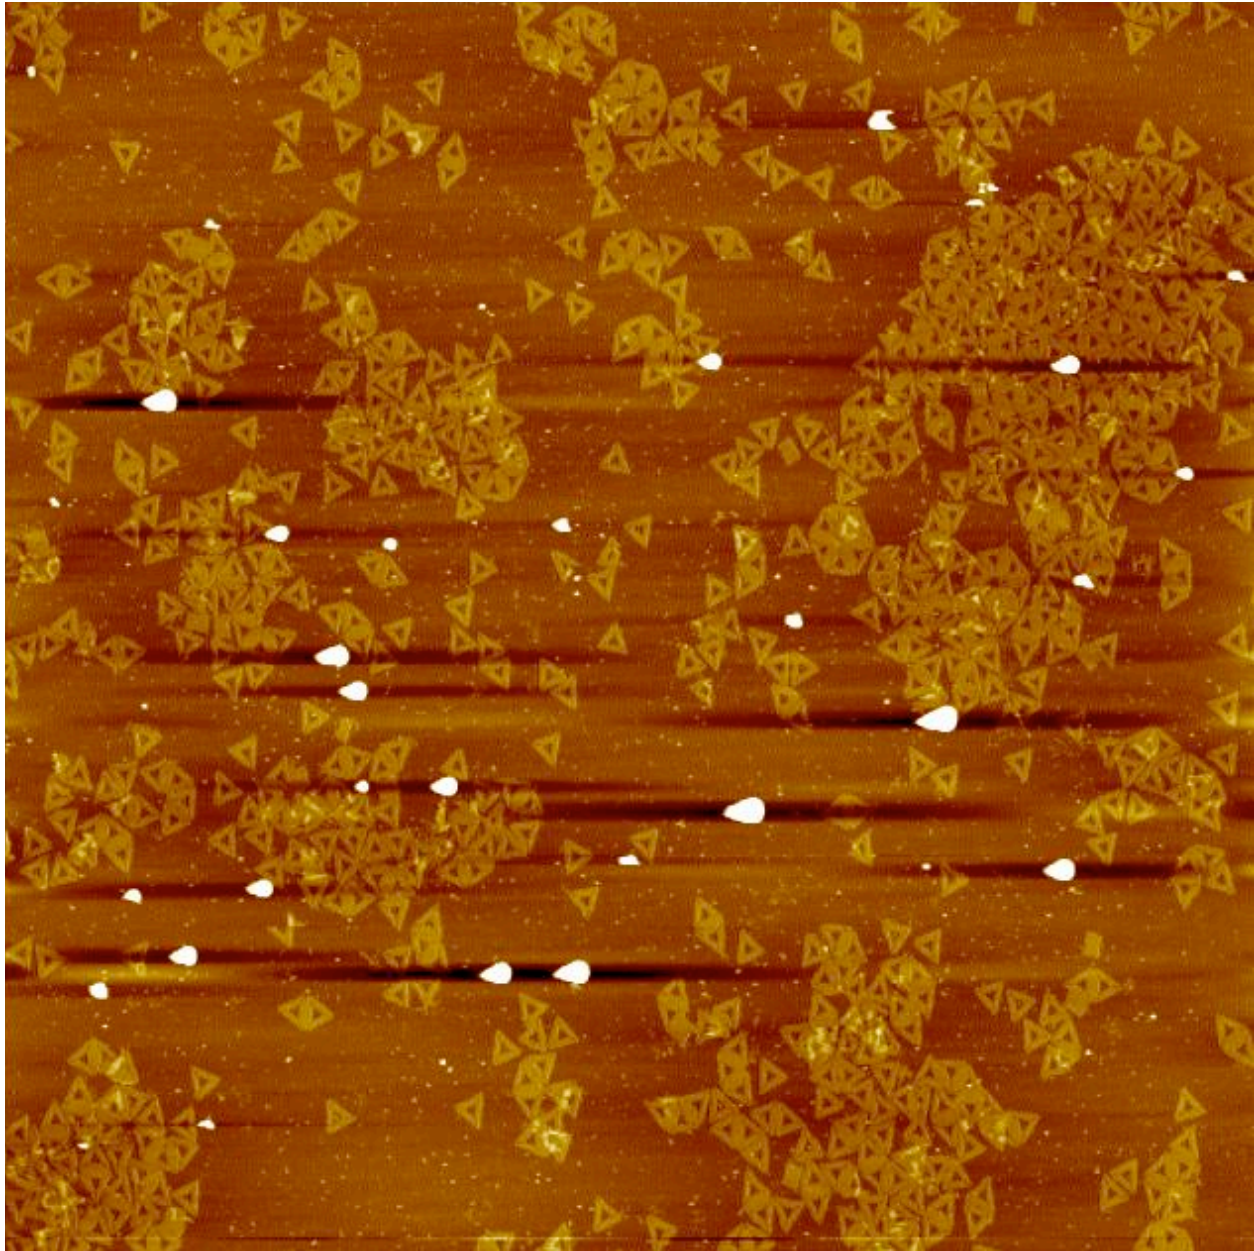



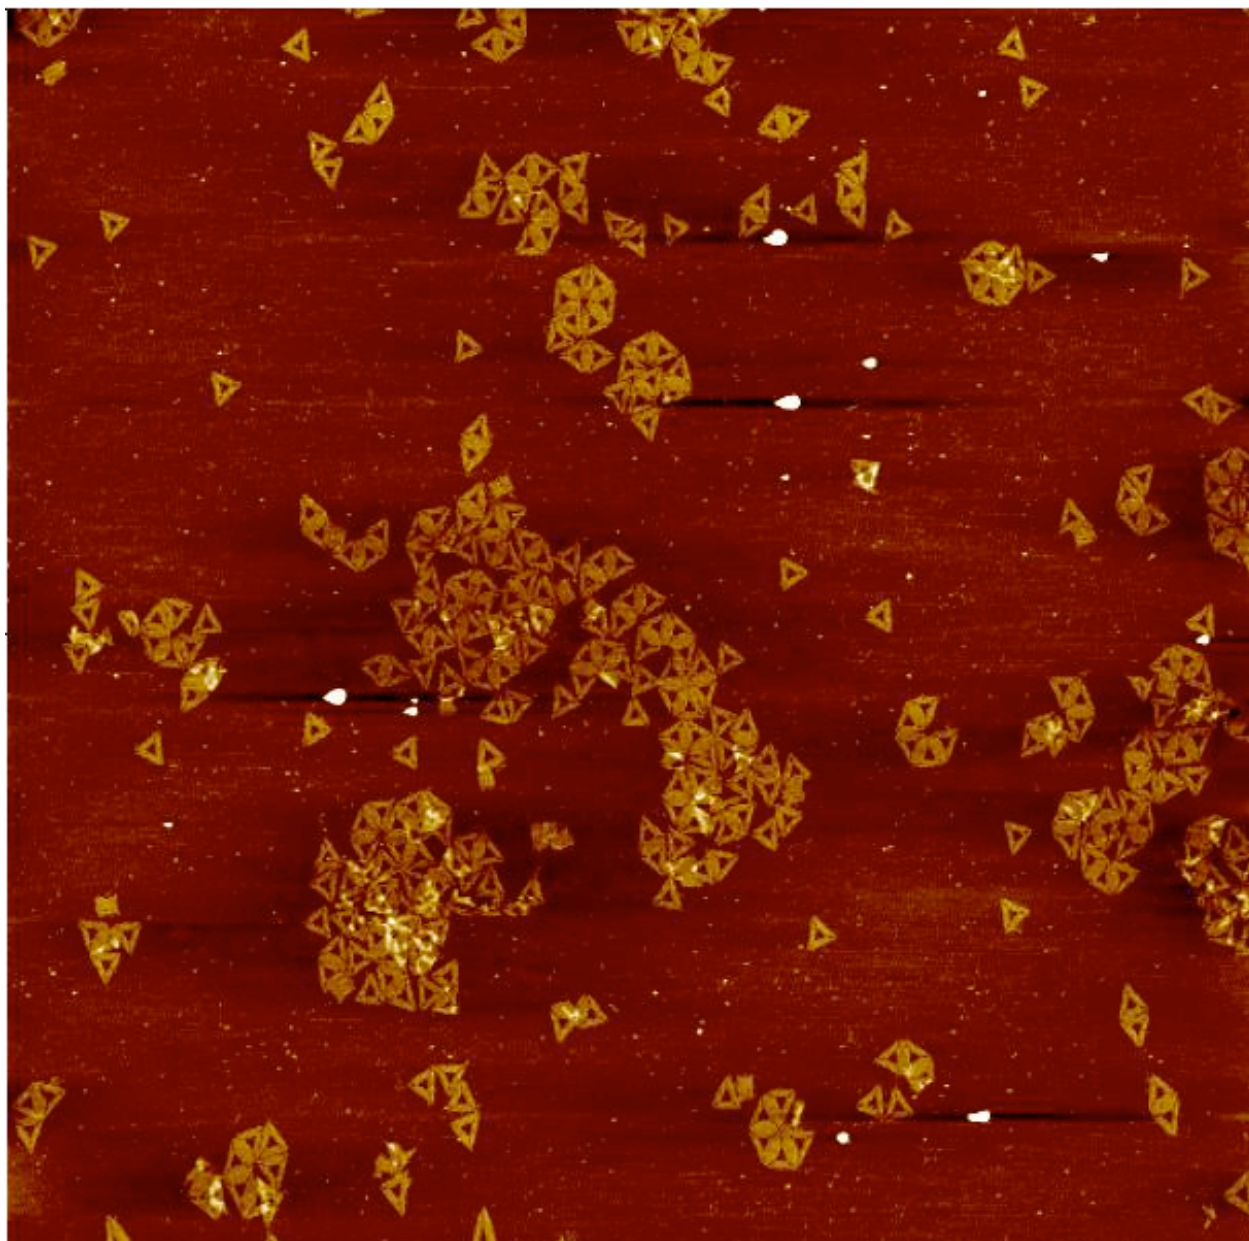

**Figure S5.** Design and AFM images of the triangular origami staple tile based super-structure using design 2 (the size of the AFM images are 5  $\mu\text{m}$   $\times$  5  $\mu\text{m}$ )

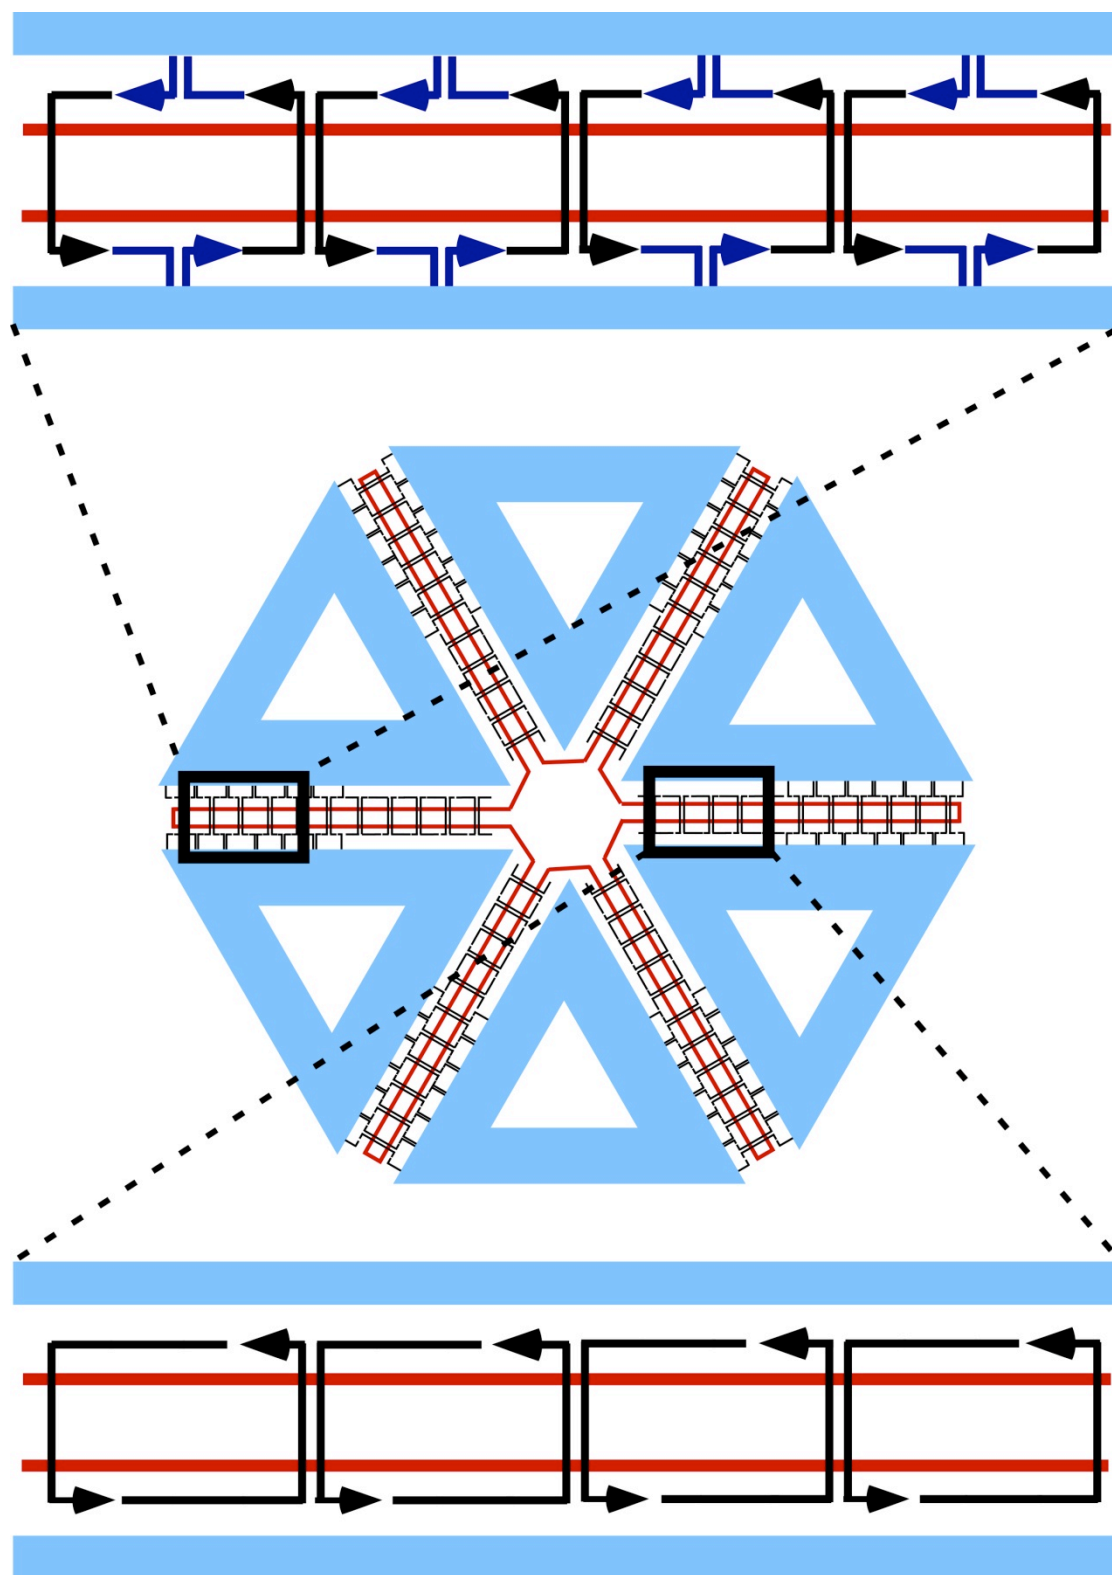

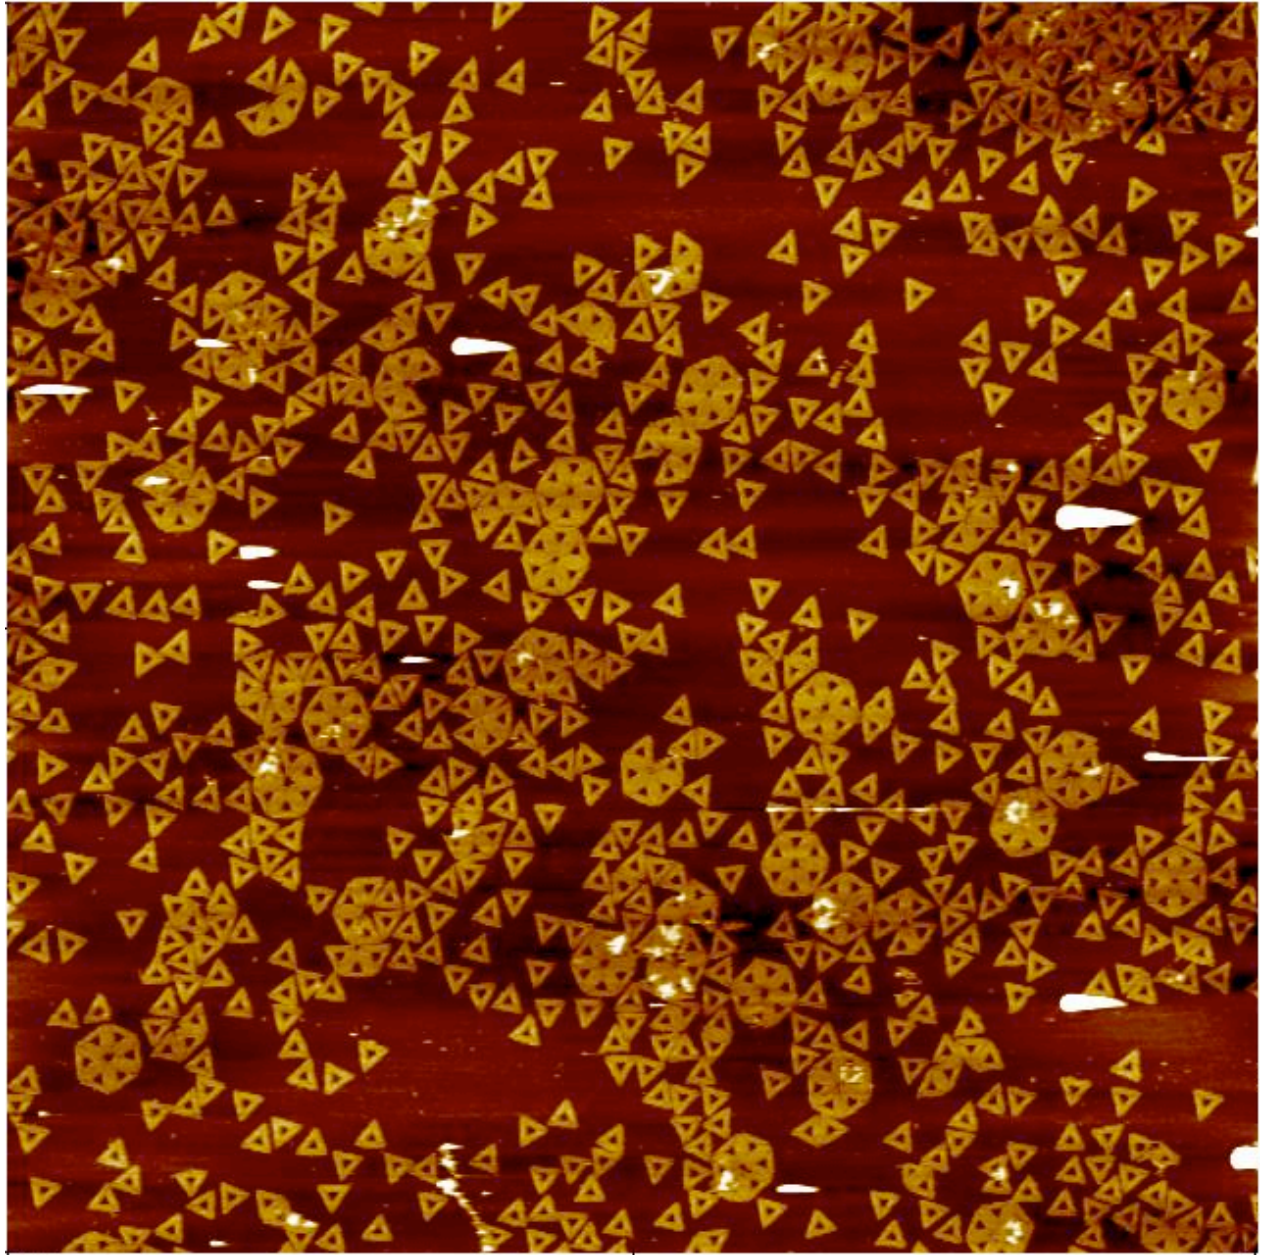

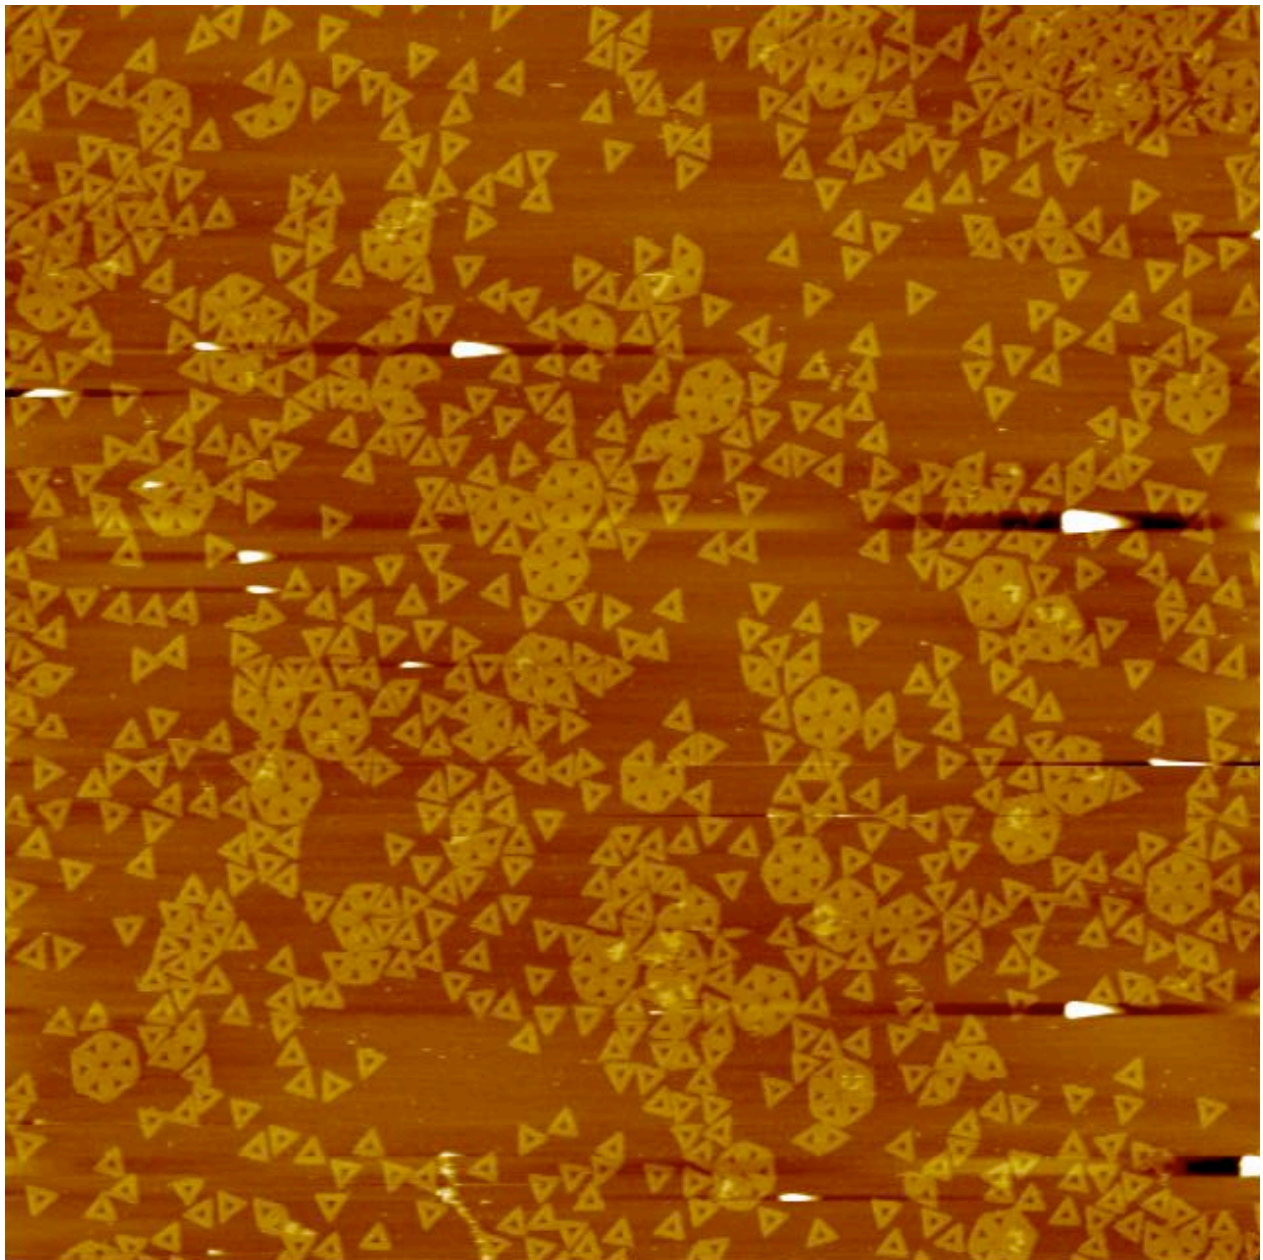

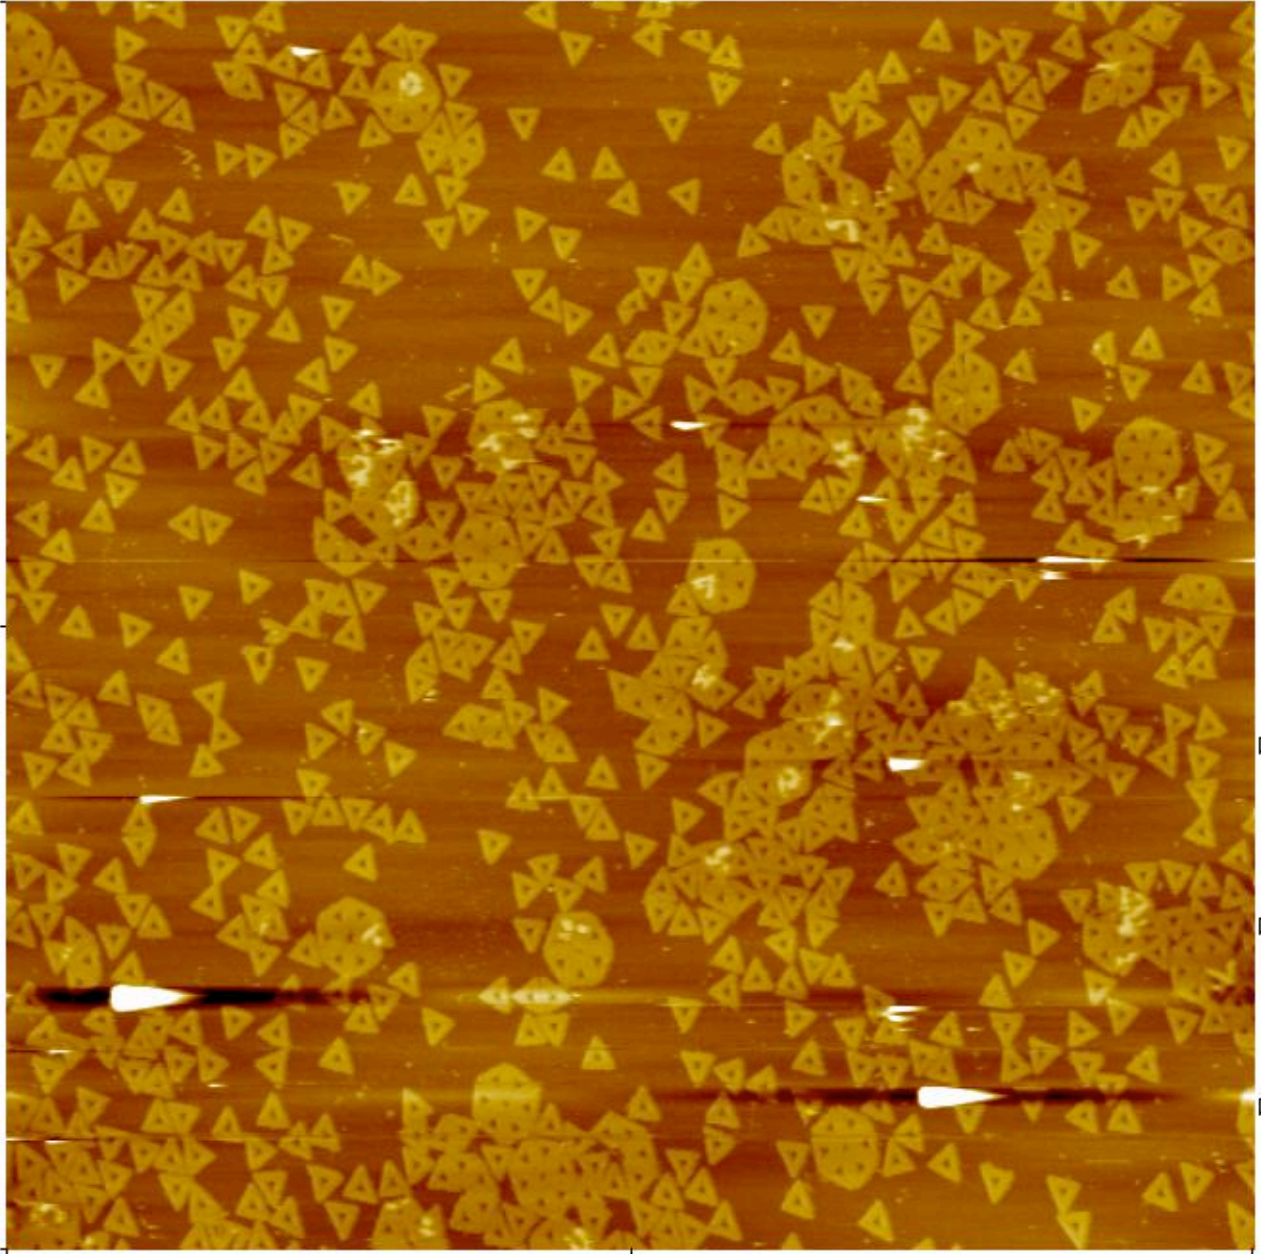

**Figure S6.** Design and AFM images (zoom out and zoom in) of the triangular origami staple tile based super-structure using design 3. The size of the AFM images are 5  $\mu\text{m} \times 5 \mu\text{m}$ . The size of the zoom out AFM images are 5  $\mu\text{m} \times 5 \mu\text{m}$  and the size of the zoom in images are 270 nm x 270 nm.

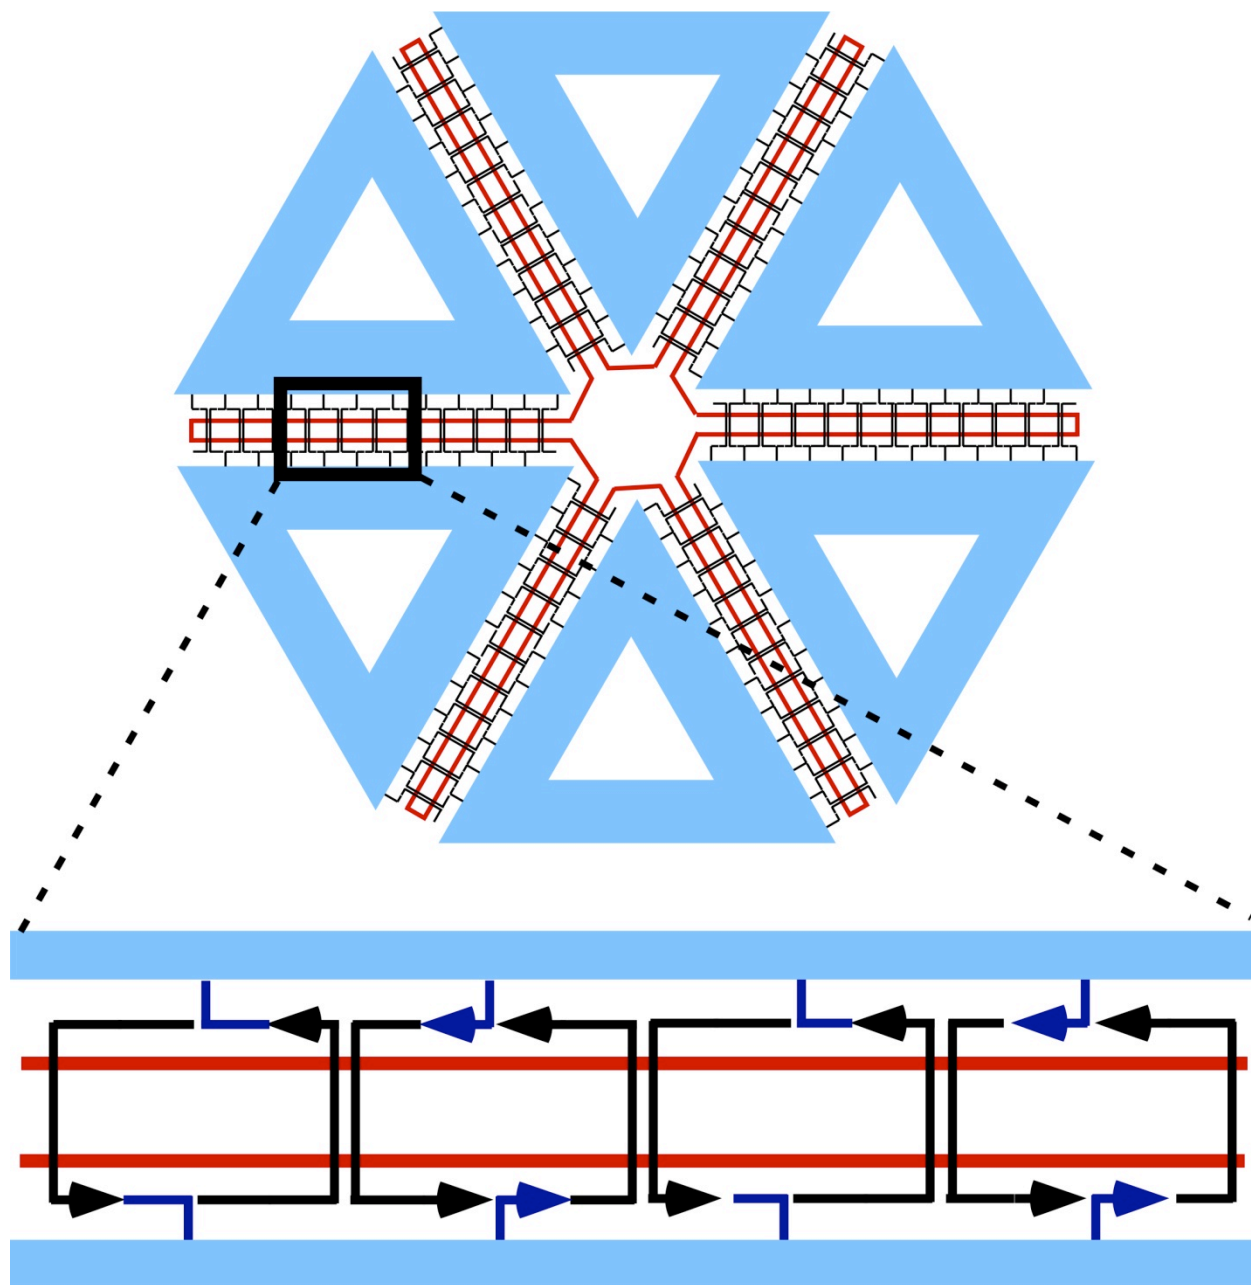

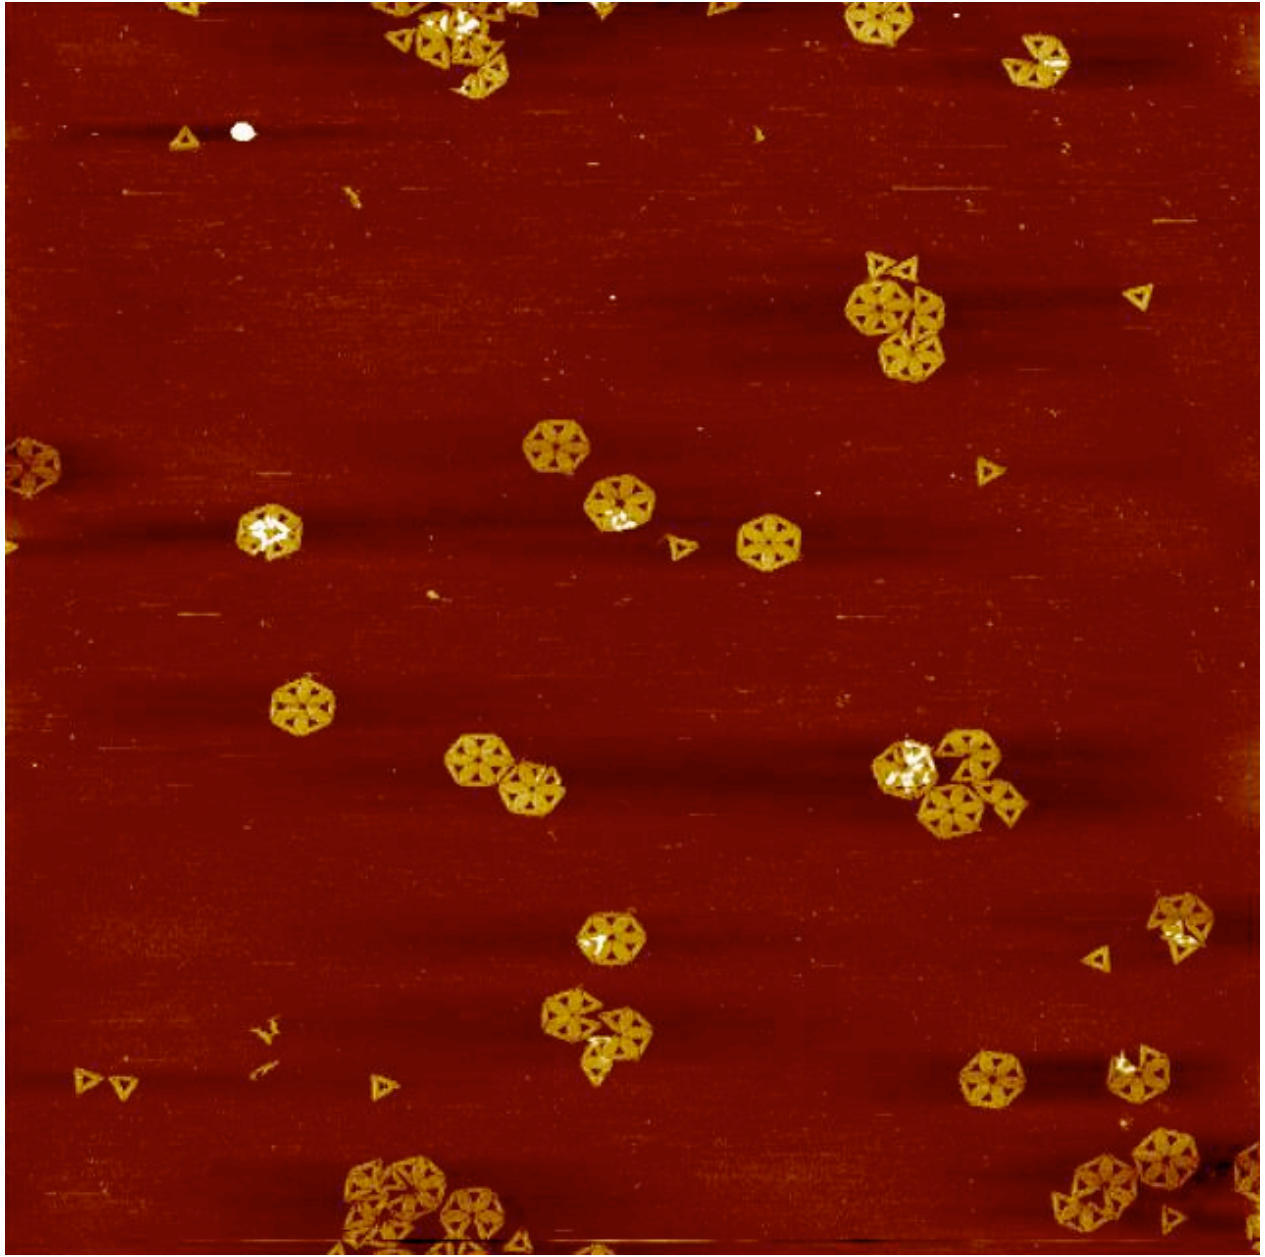

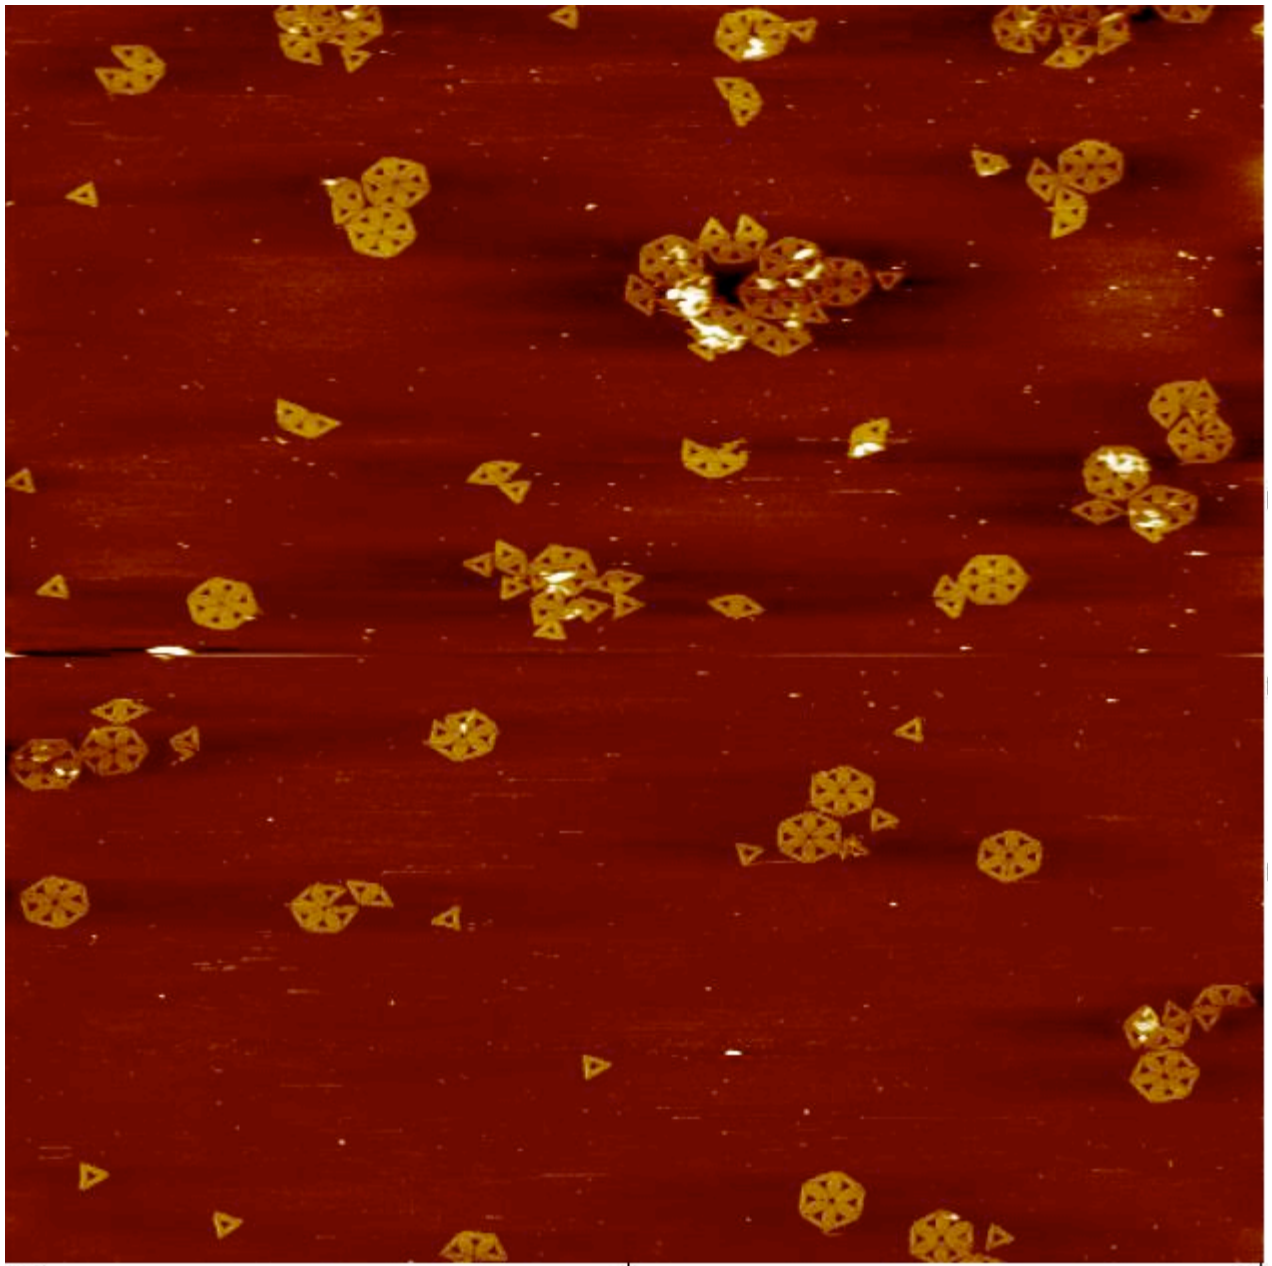



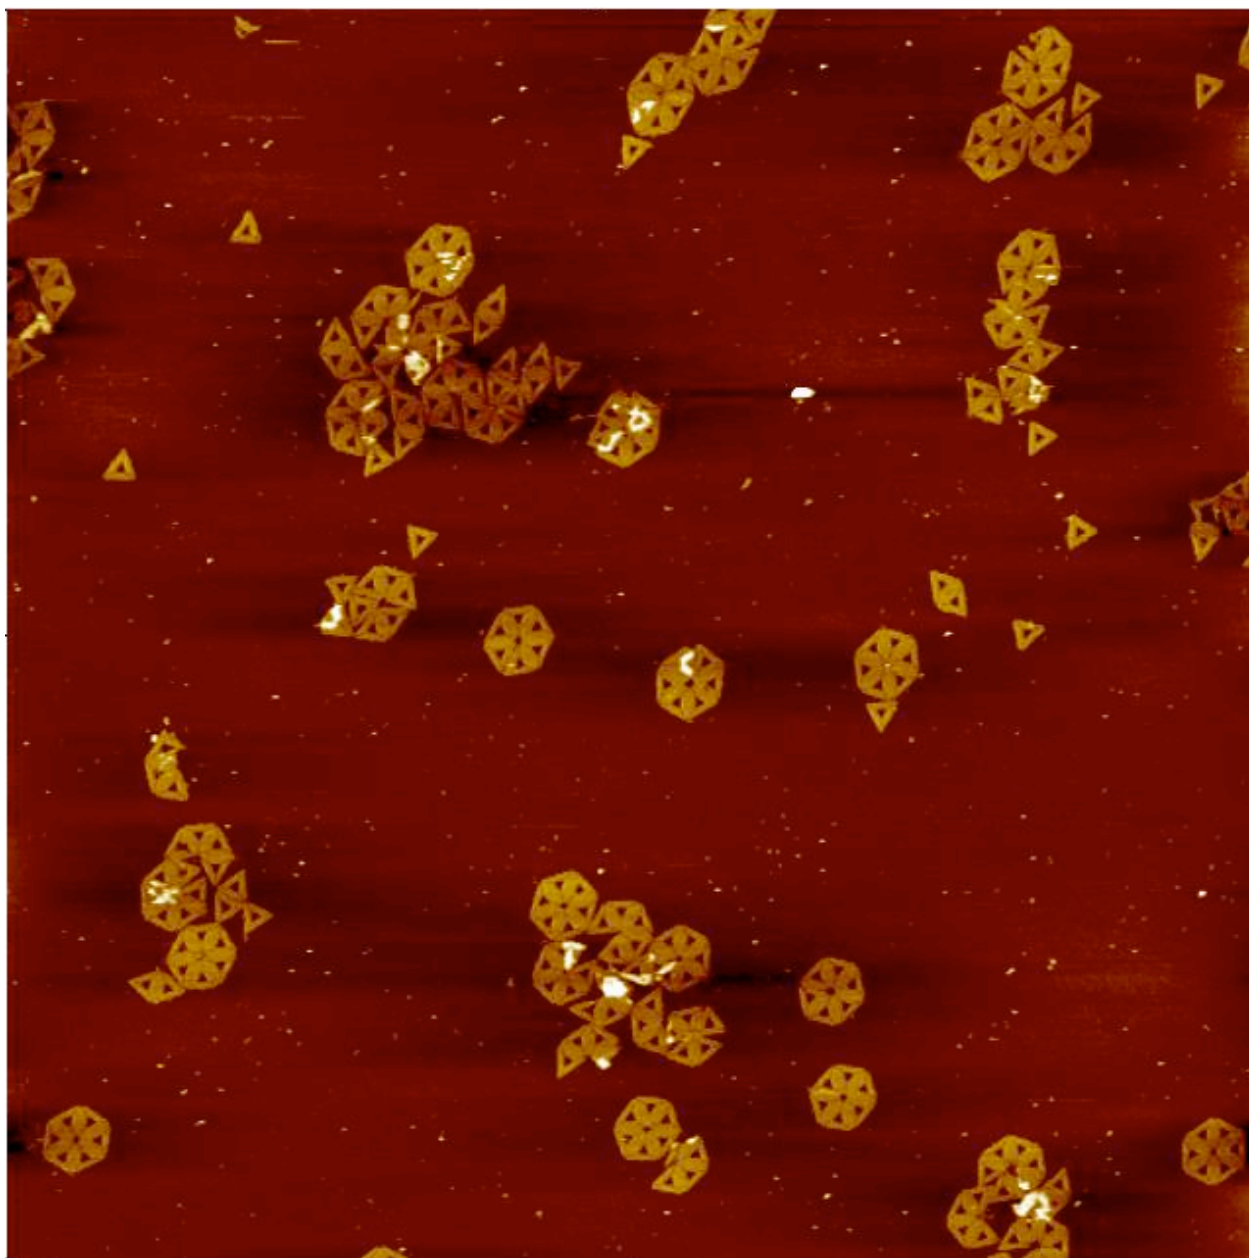

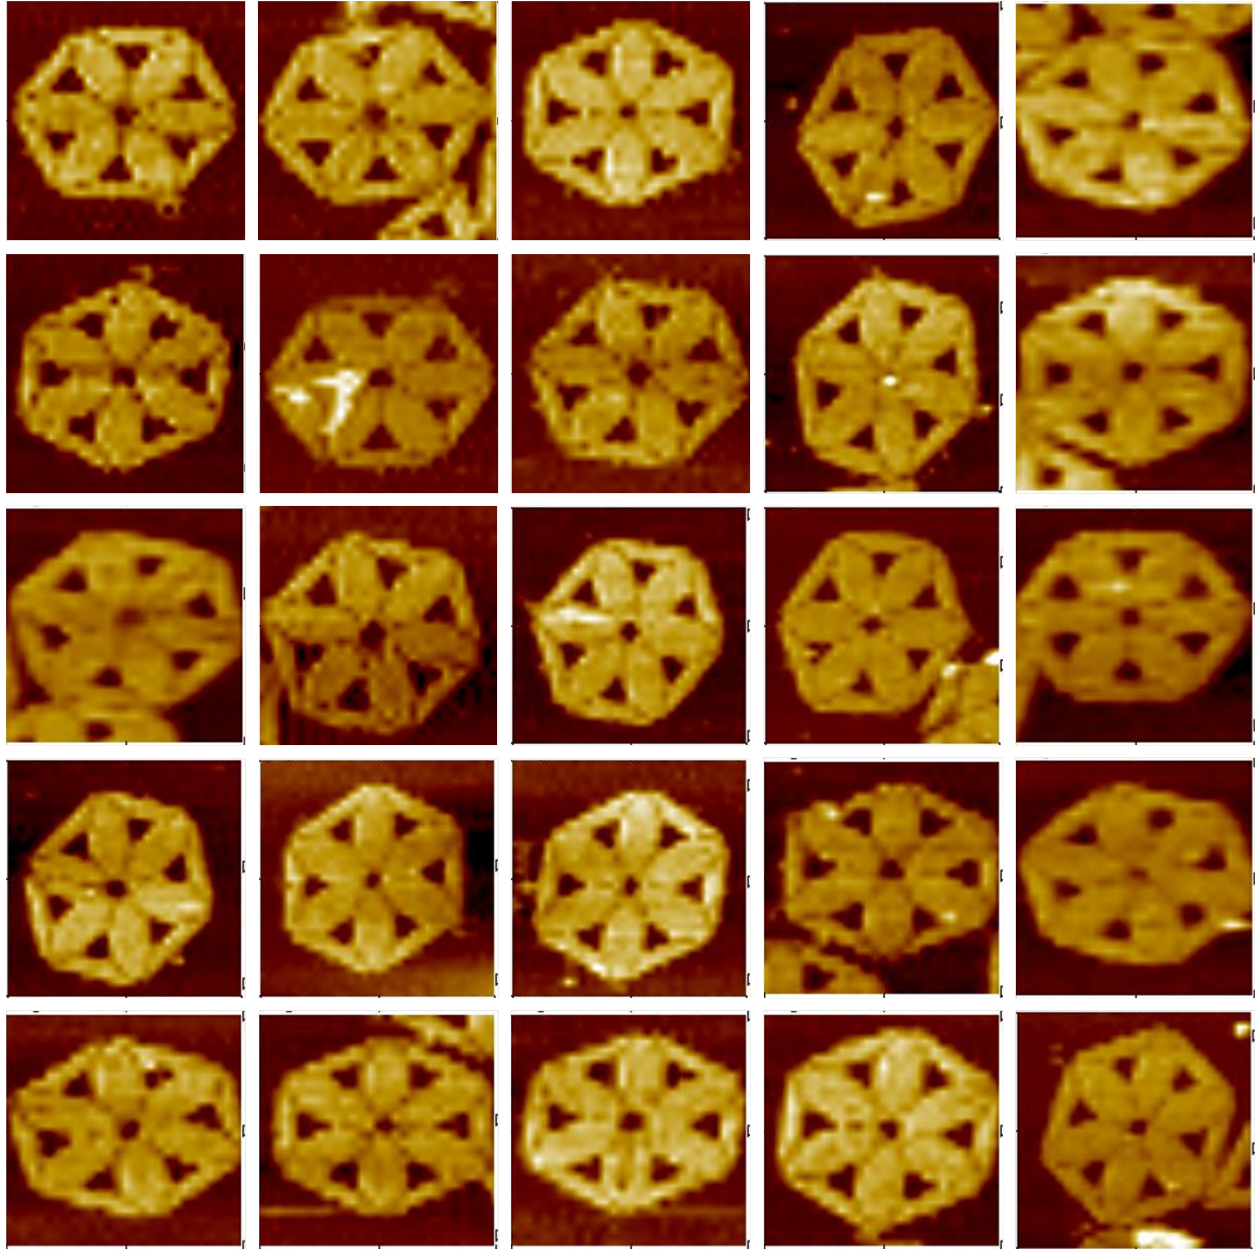

**Figure S7.** Design of the square DNA origami staple tile. The red strand represents the M13 scaffold. The black strands are the staple strands with arrows pointing to the 3' ends. The spacing between consecutive crossovers connecting neighboring parallel helices is 32 base-pairs. The outermost helices are 224 bps or approximately 21 full turns. To make 90 degree angles at each corner, each consecutive helix is 8 bps shorter (on both ends) than the outer, adjacent helix.

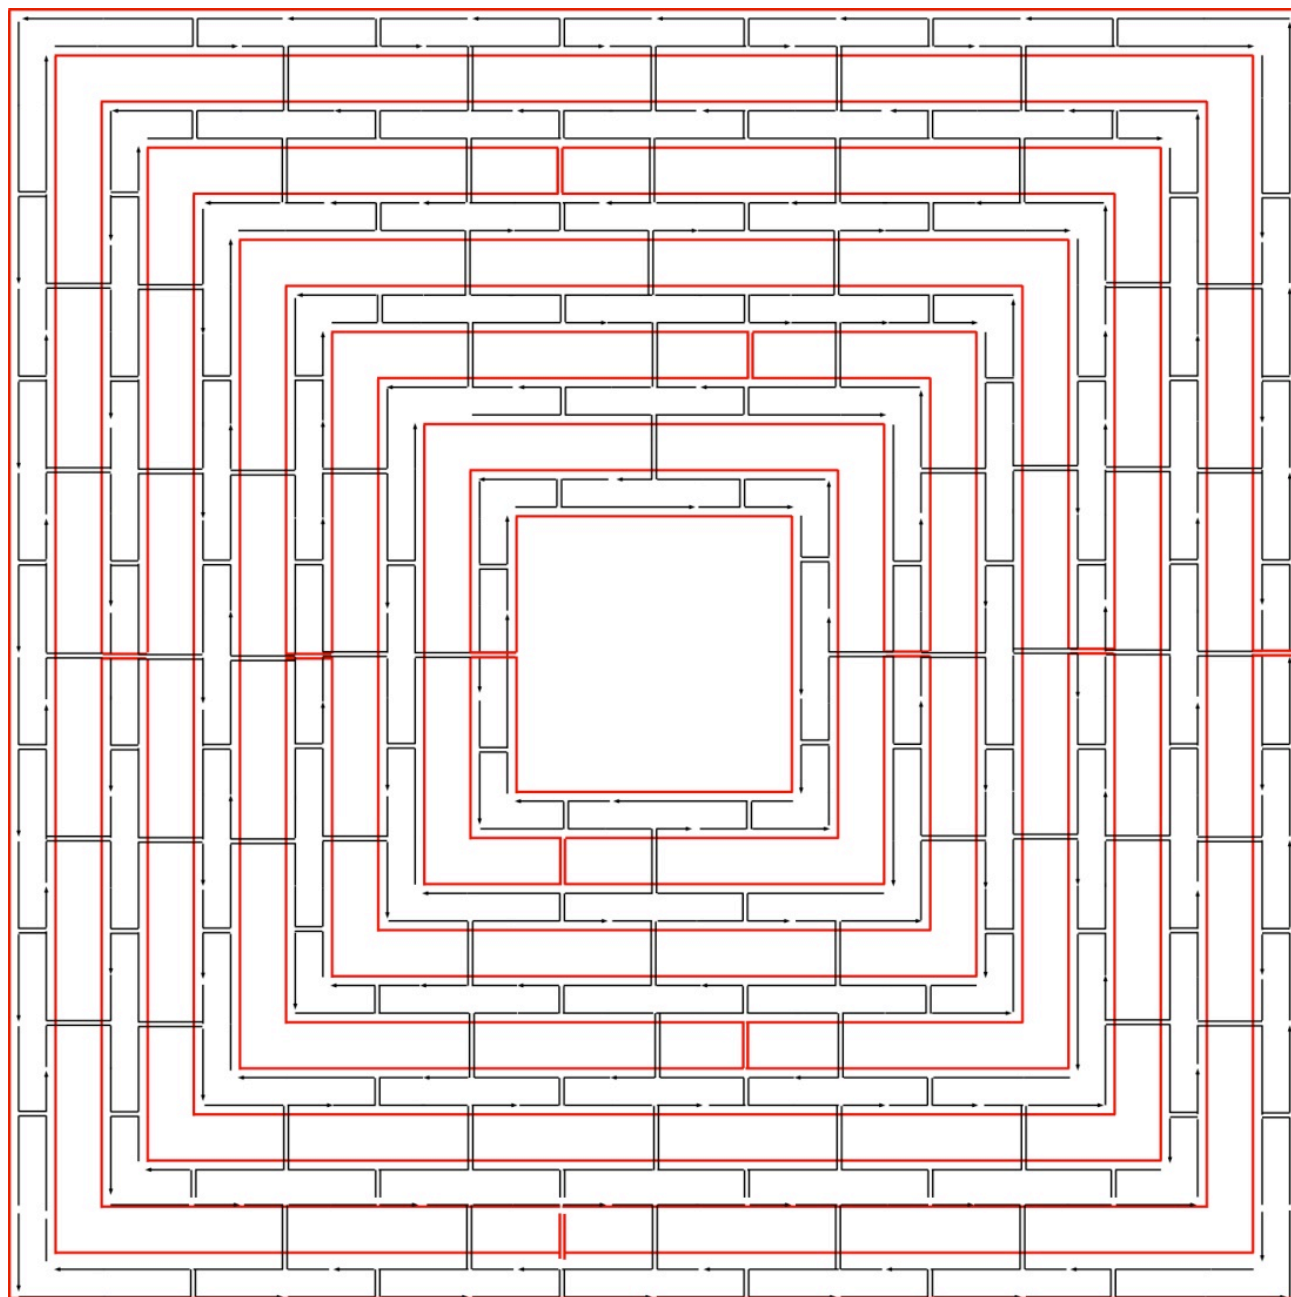

**Figure S8.** AFM image of the individual square shaped DNA origami staple tile. The size of the image is 2.5  $\mu\text{m}$   $\times$  2.5  $\mu\text{m}$ .

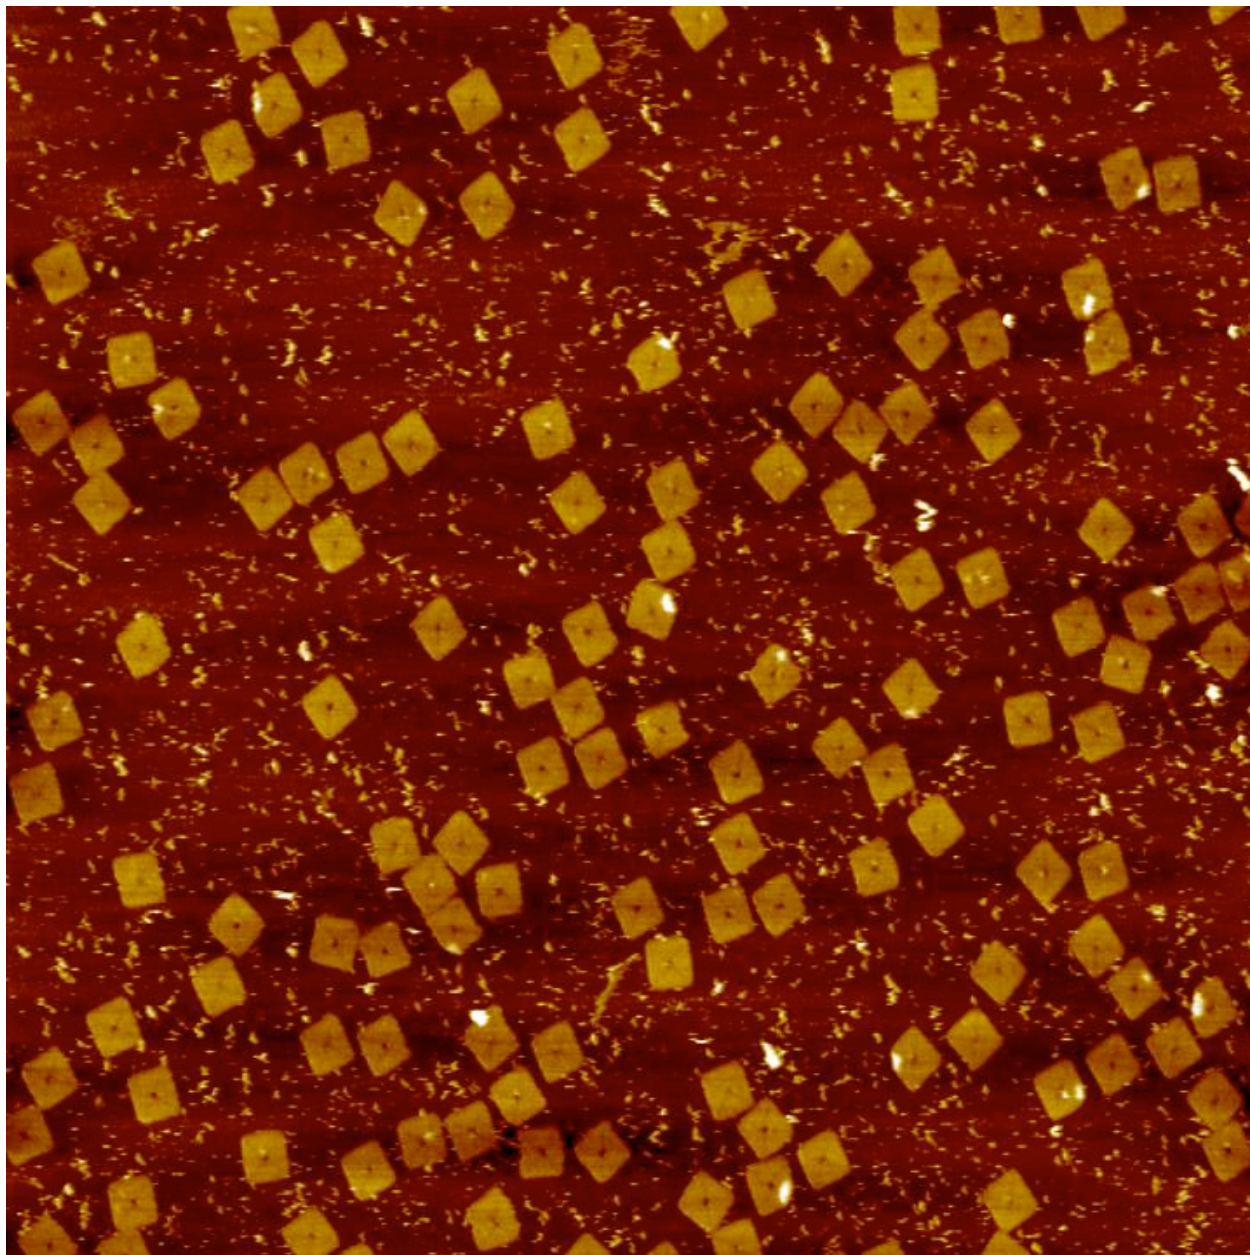

**Figure S9.** Agarose gel electrophoresis result for the square DNA origami. (1.5% agarose gel)

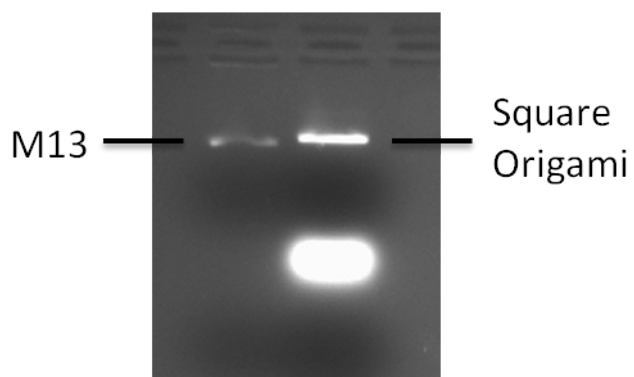

**Figure S10.** Zoom out and zoom in AFM images for 3 x 3 square staple tile based superstructures. The size of the zoom out images are 5  $\mu\text{m}$   $\times$  5  $\mu\text{m}$ , and the size of the zoom in images are 340 nm  $\times$  340 nm.

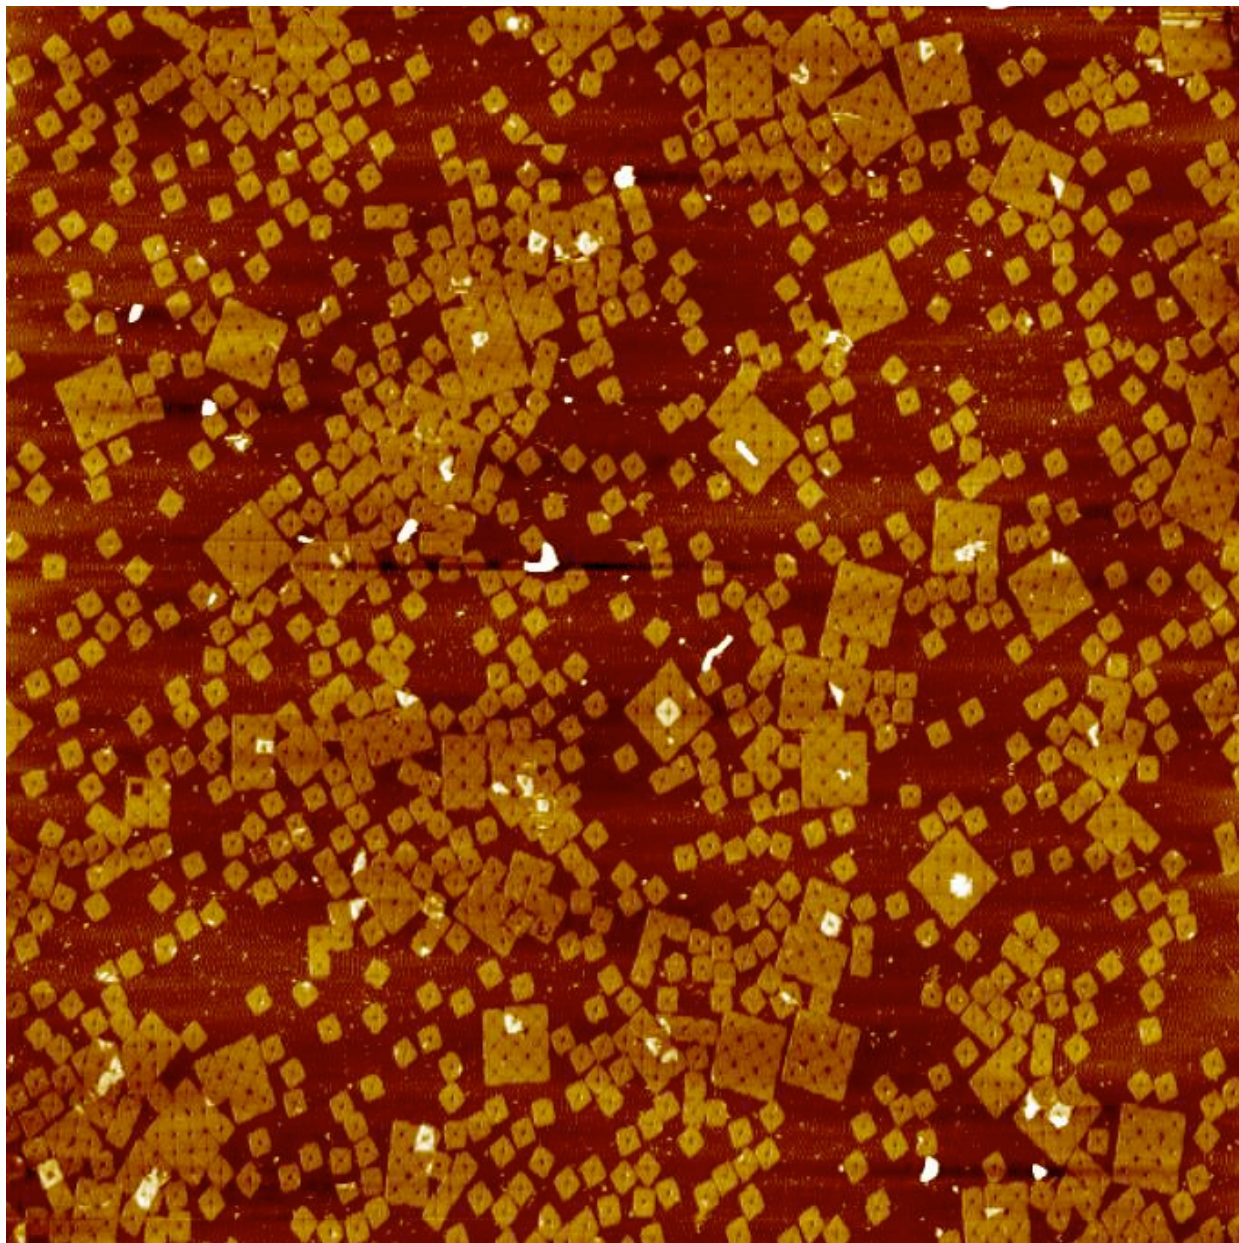

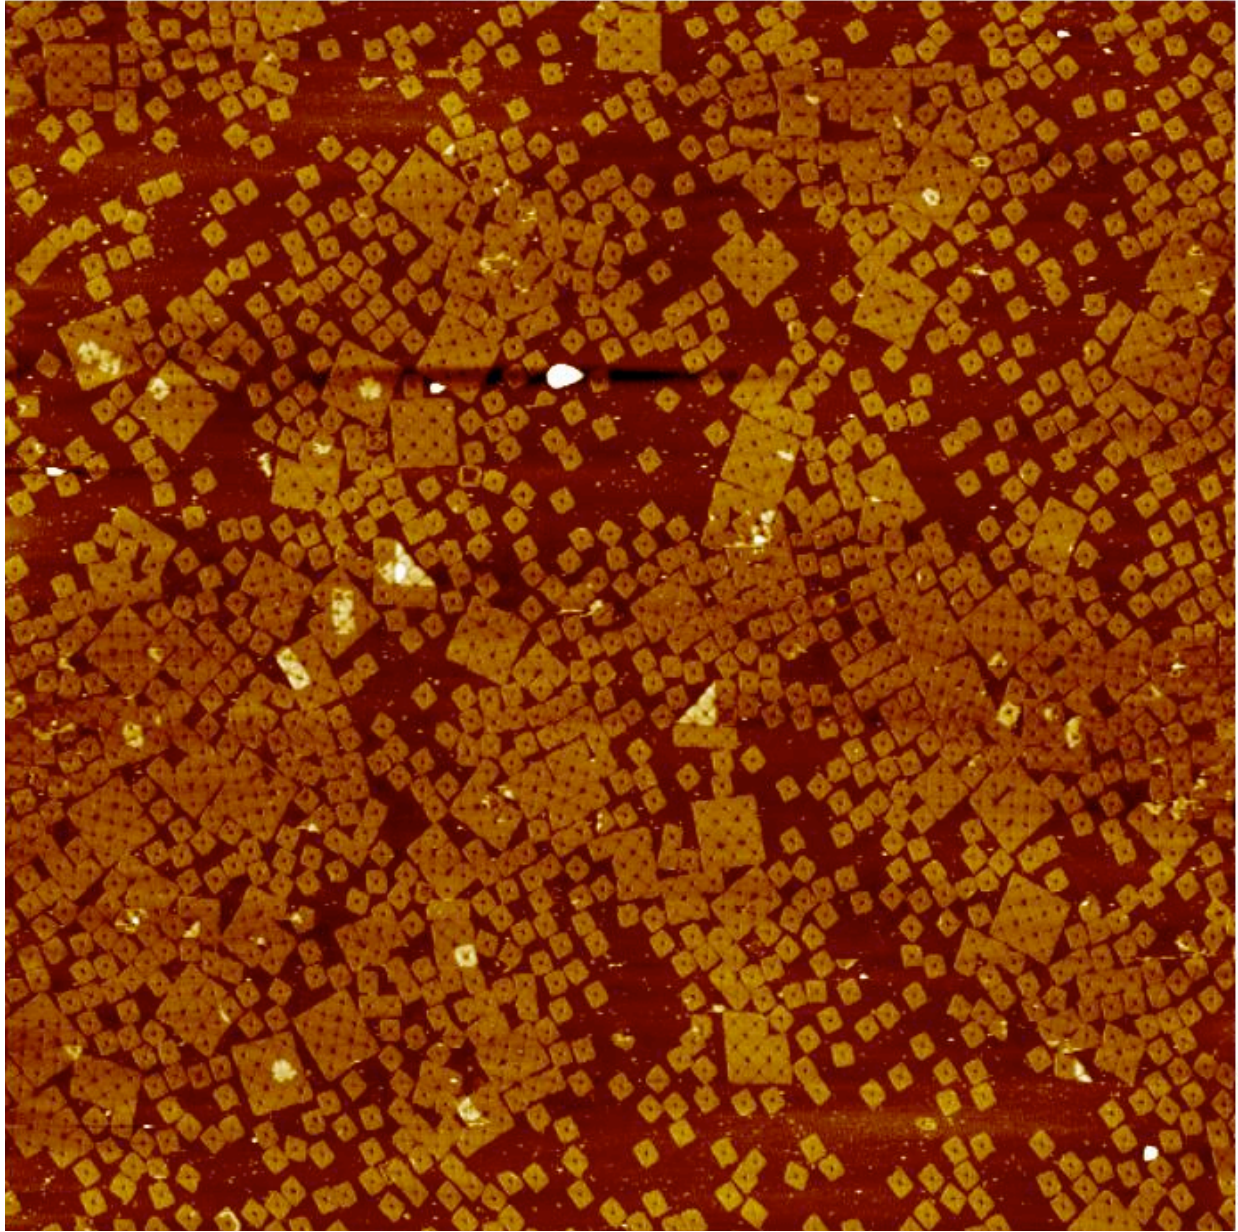

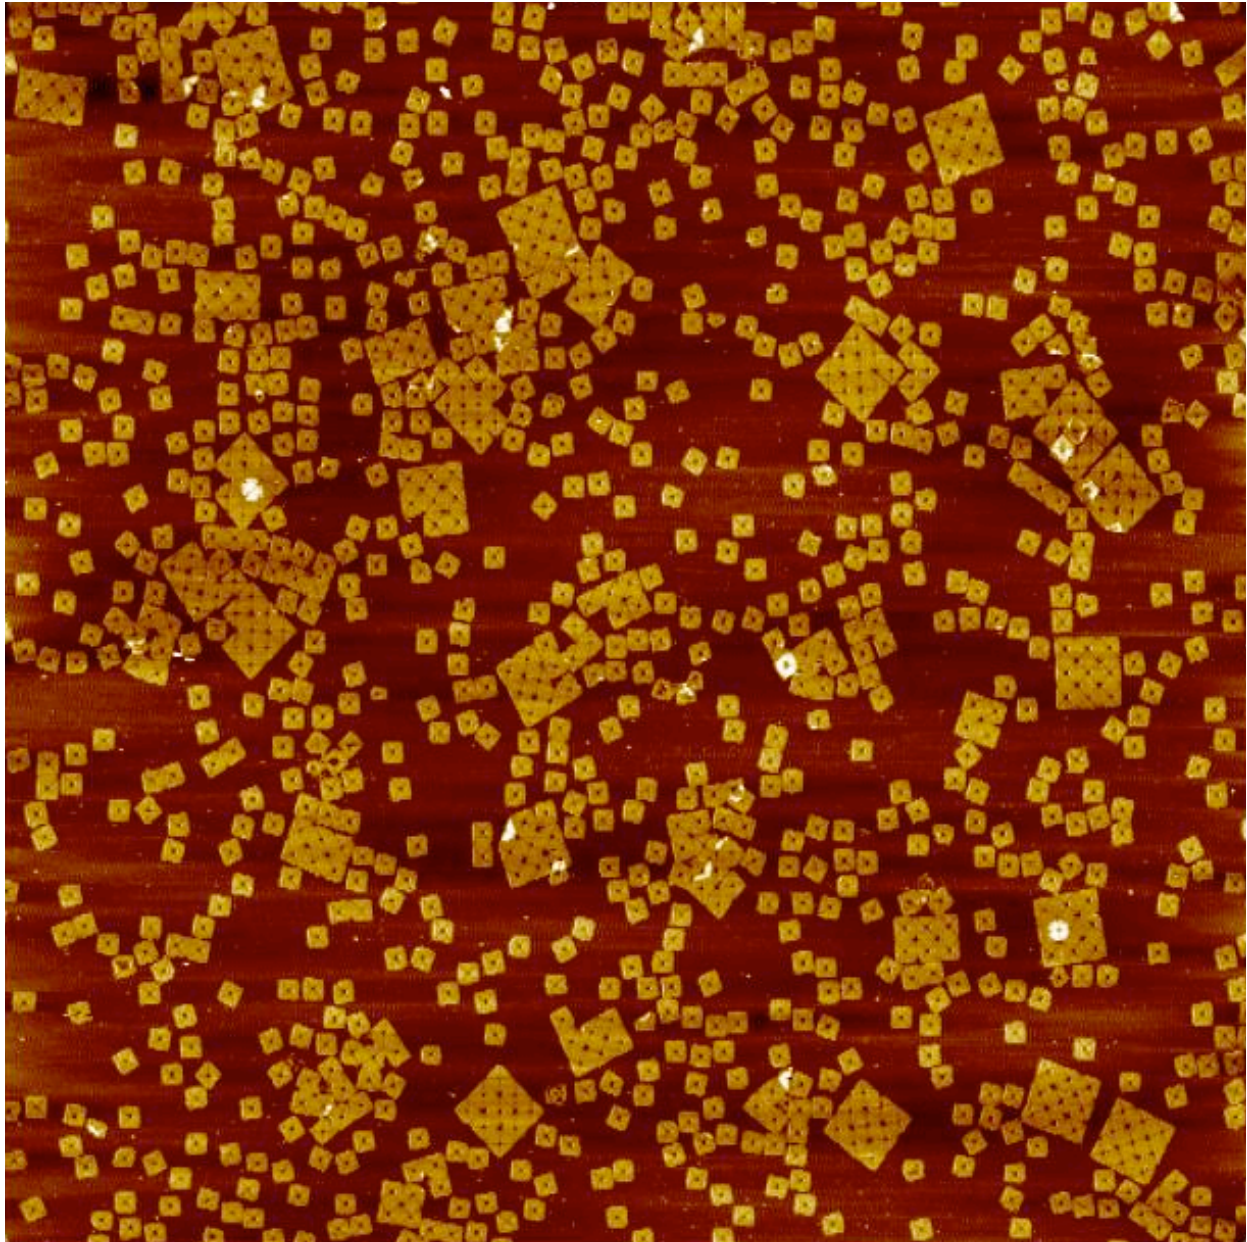



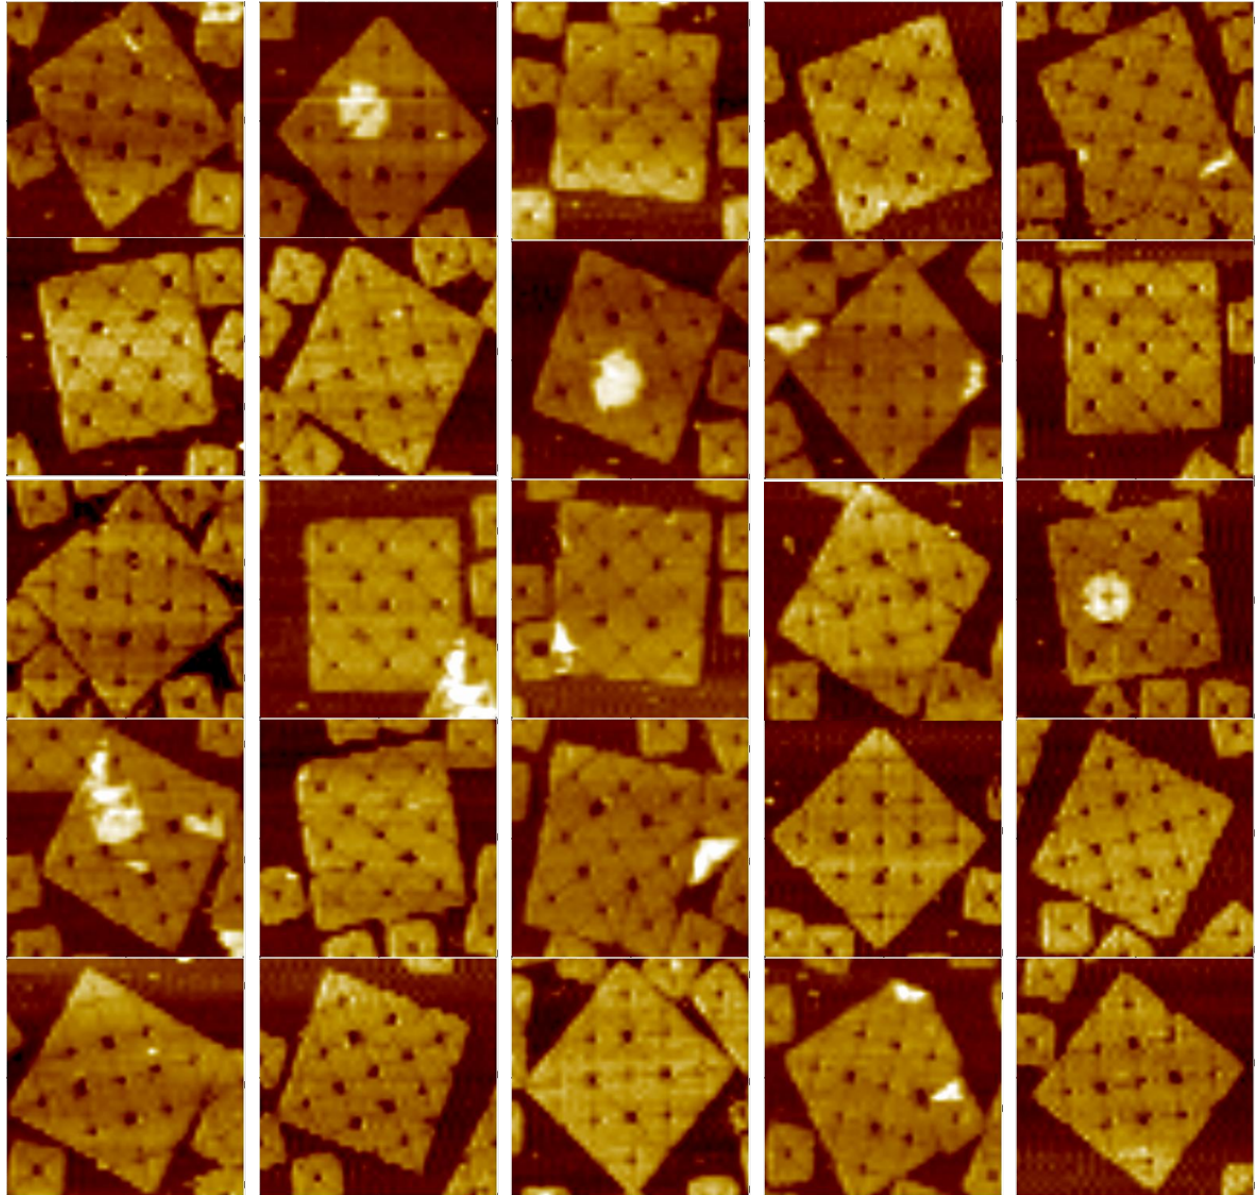

**Figure S11.** Design of the hexagonal DNA origami staple tile. The red strand represents the M13 scaffold. The black strands are the staple strands with arrows pointing to the 3' ends. The design principle is the same as for the square origami. 9 parallel helices are arranged in a plane forming each side. The spacing between consecutive crossovers connecting neighboring parallel helices is 32 bps. The outermost helices are 160 bps or approximately 15 full turns. To make 120 degree turns at each corner, each consecutive helix is 4 bps shorter (on both ends) than the outer, adjacent helix.

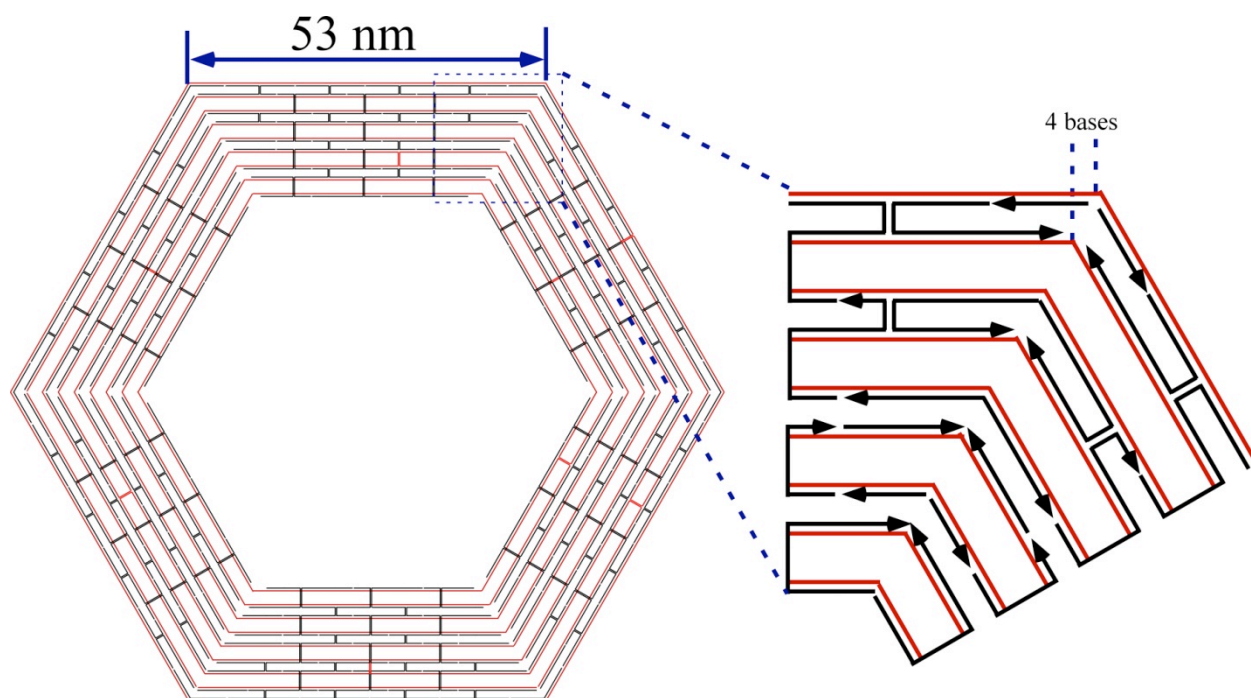

**Figure S12.** AFM image of individual hexagonal DNA origami staple tiles. The size of image is 5  $\mu\text{m}$   $\times$  5  $\mu\text{m}$ .

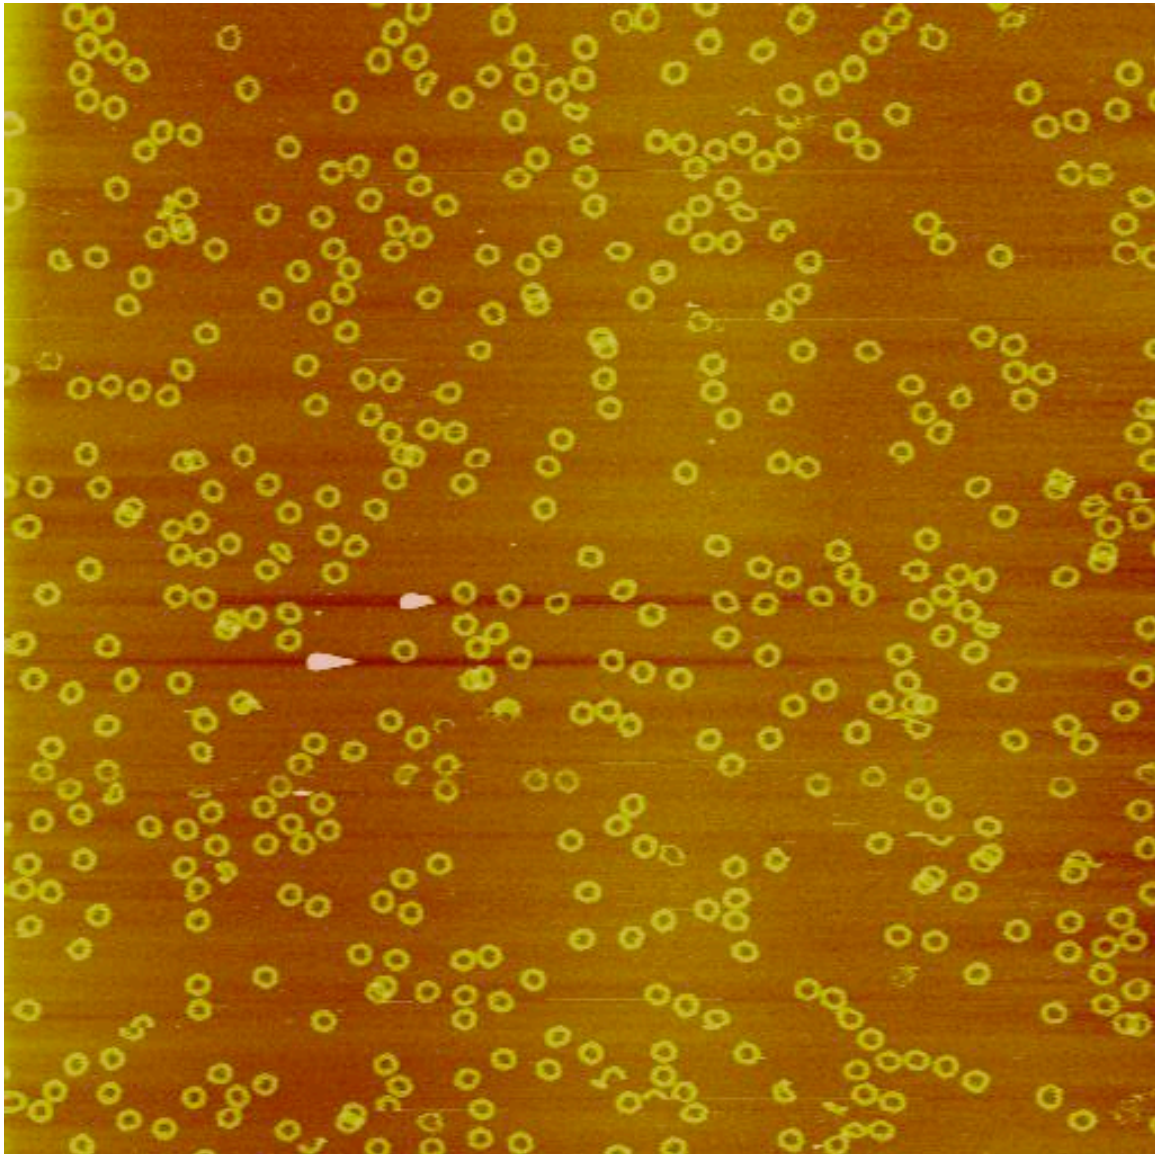

**Figure S13.** Agarose gel electrophoresis result for hexagonal shaped DNA Origami.

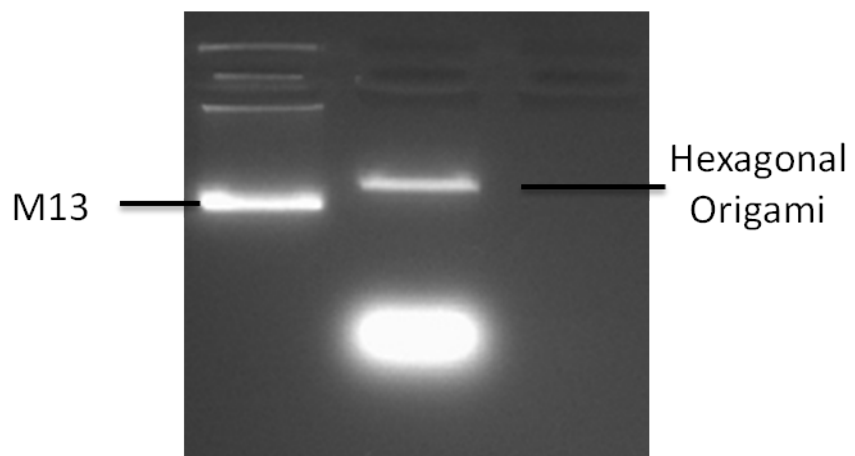

**Figure S14.** Zoom out and zoom in AFM images of 3 x 3 hexagonal staple tile based origami super-structures. The size of the zoom out images are 5  $\mu\text{m} \times 5 \mu\text{m}$ , and the size of the zoom in images are 470 nm x 470 nm.

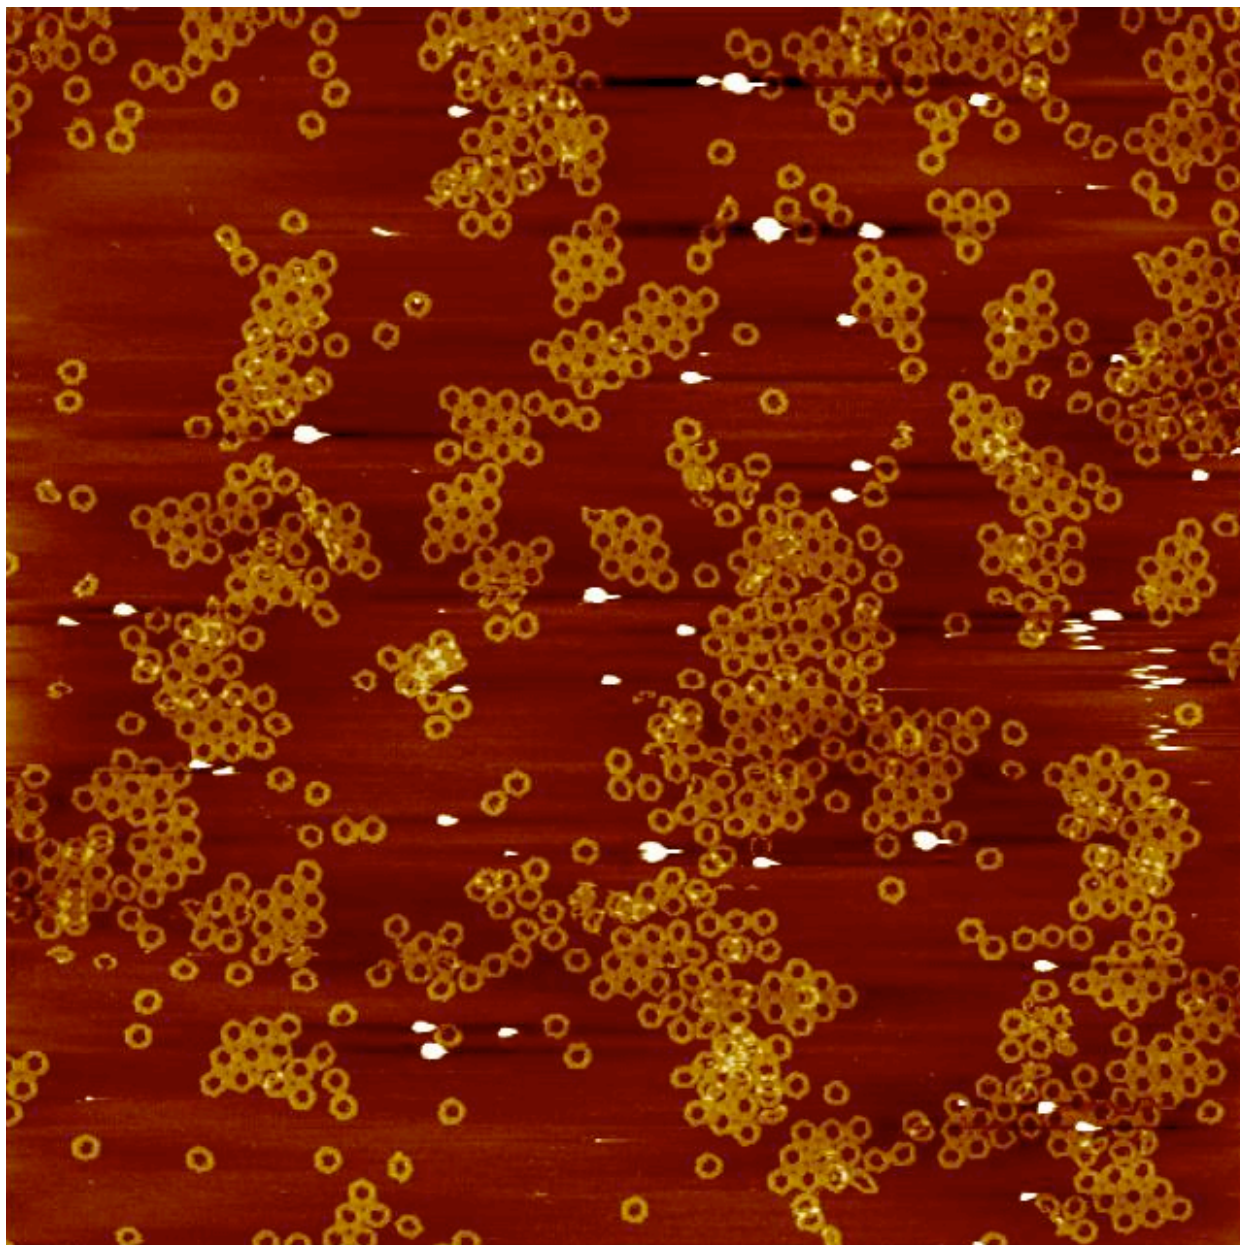

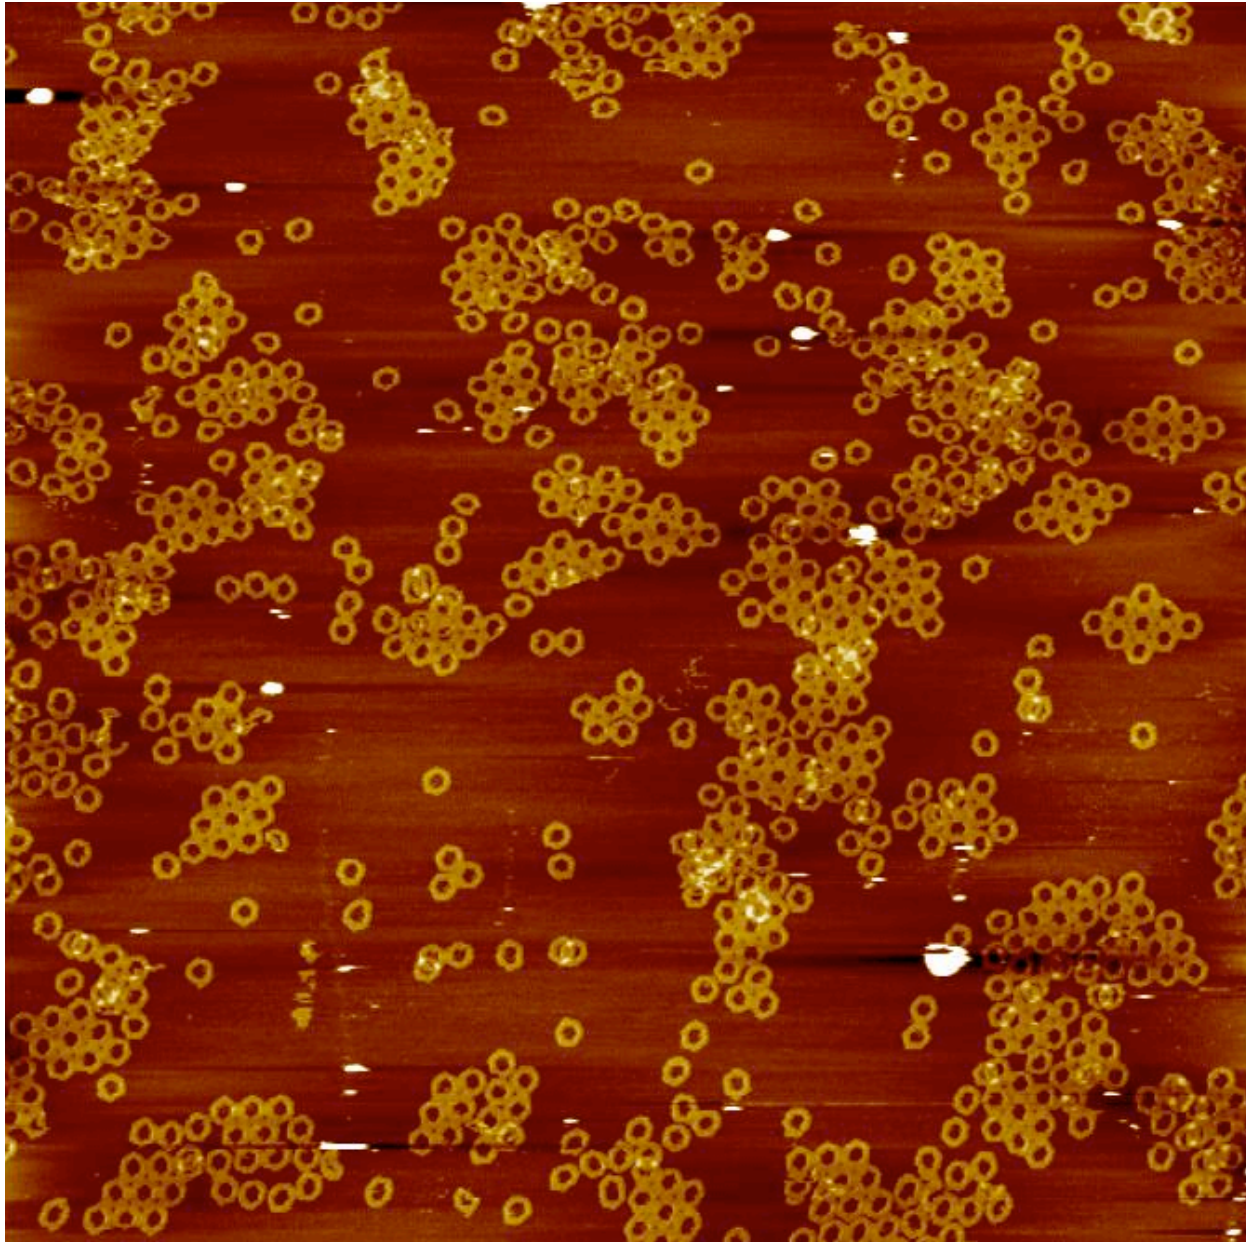

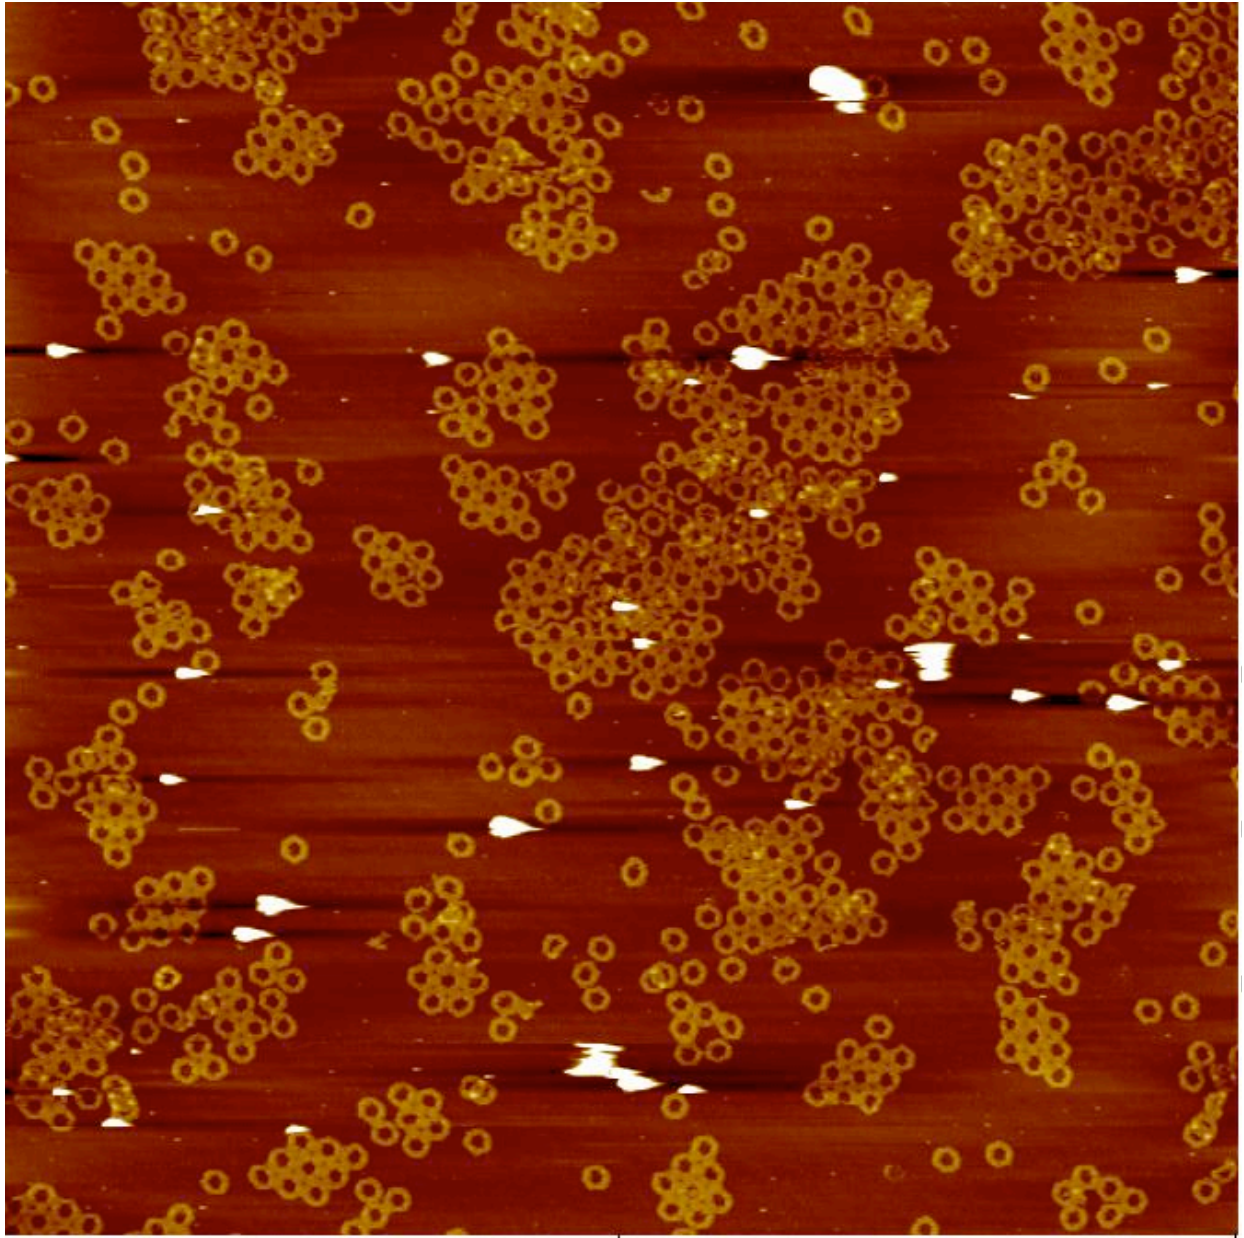

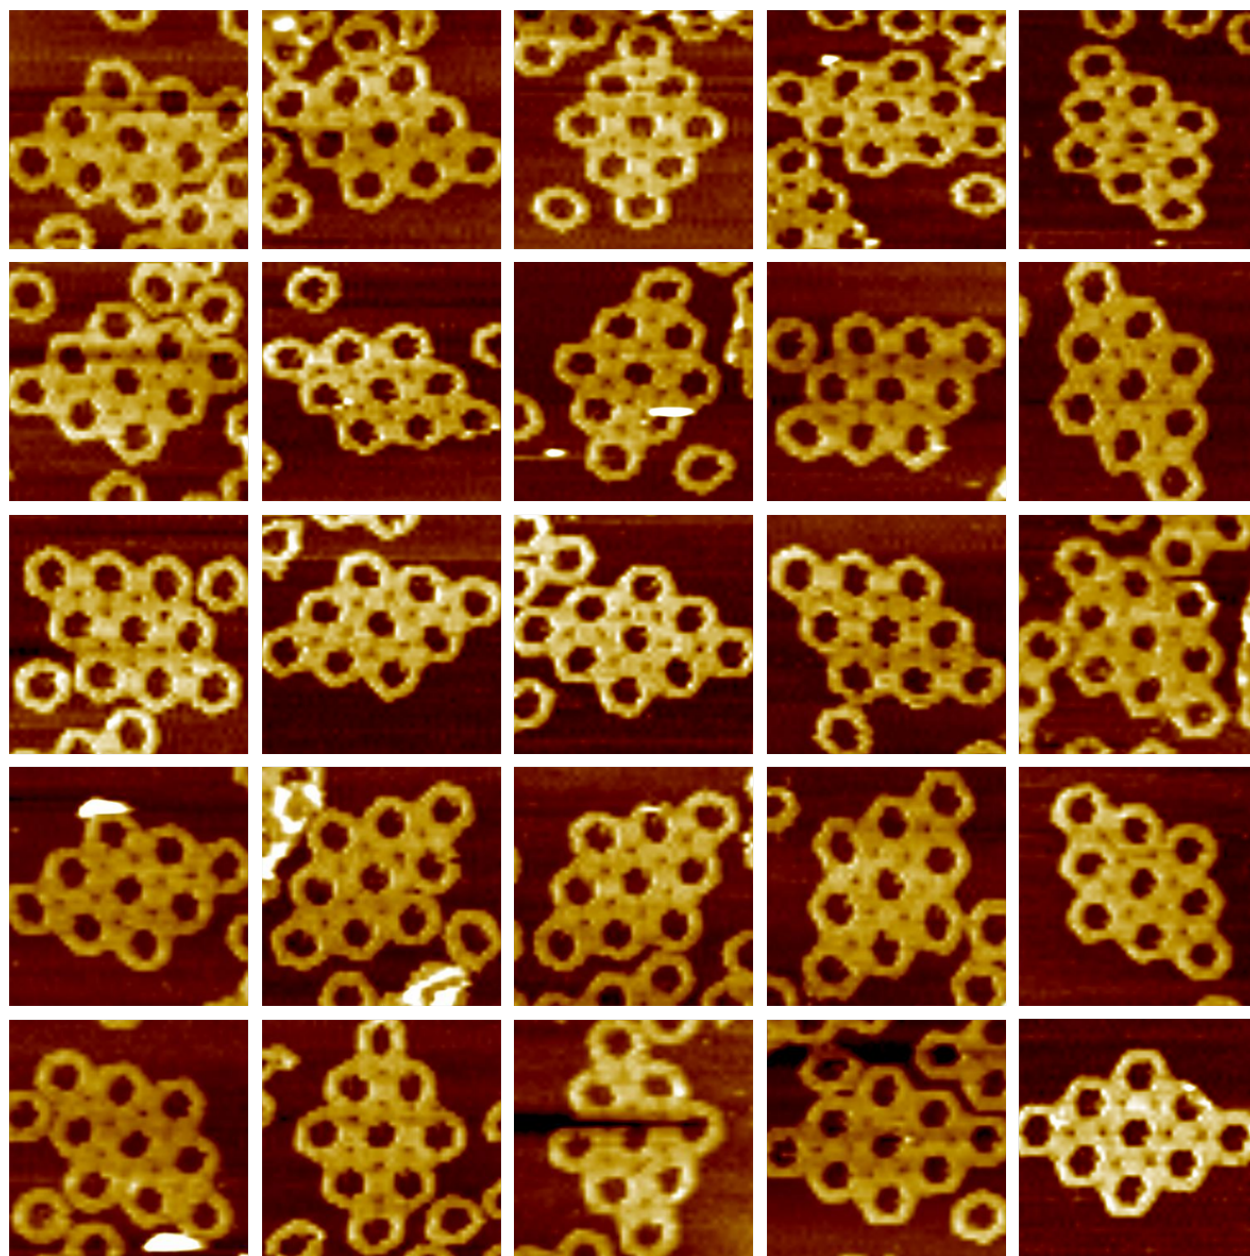



**Figure S15.** Design for the diamond shaped DNA origami staple tiles.

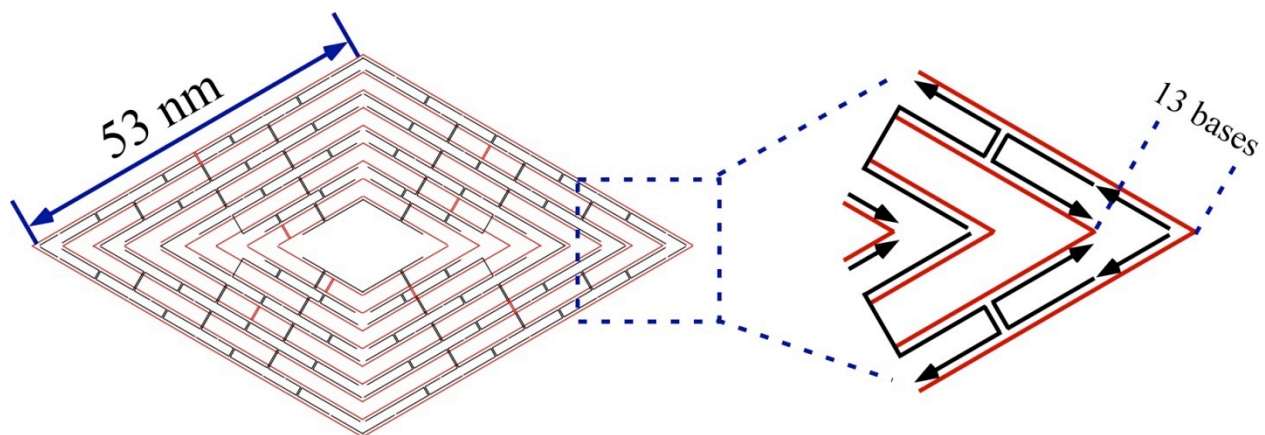

**Figure S16.** AFM image of the individual diamond shaped DNA origami staple tiles. The size of the image is 3  $\mu\text{m}$   $\times$  3  $\mu\text{m}$ .

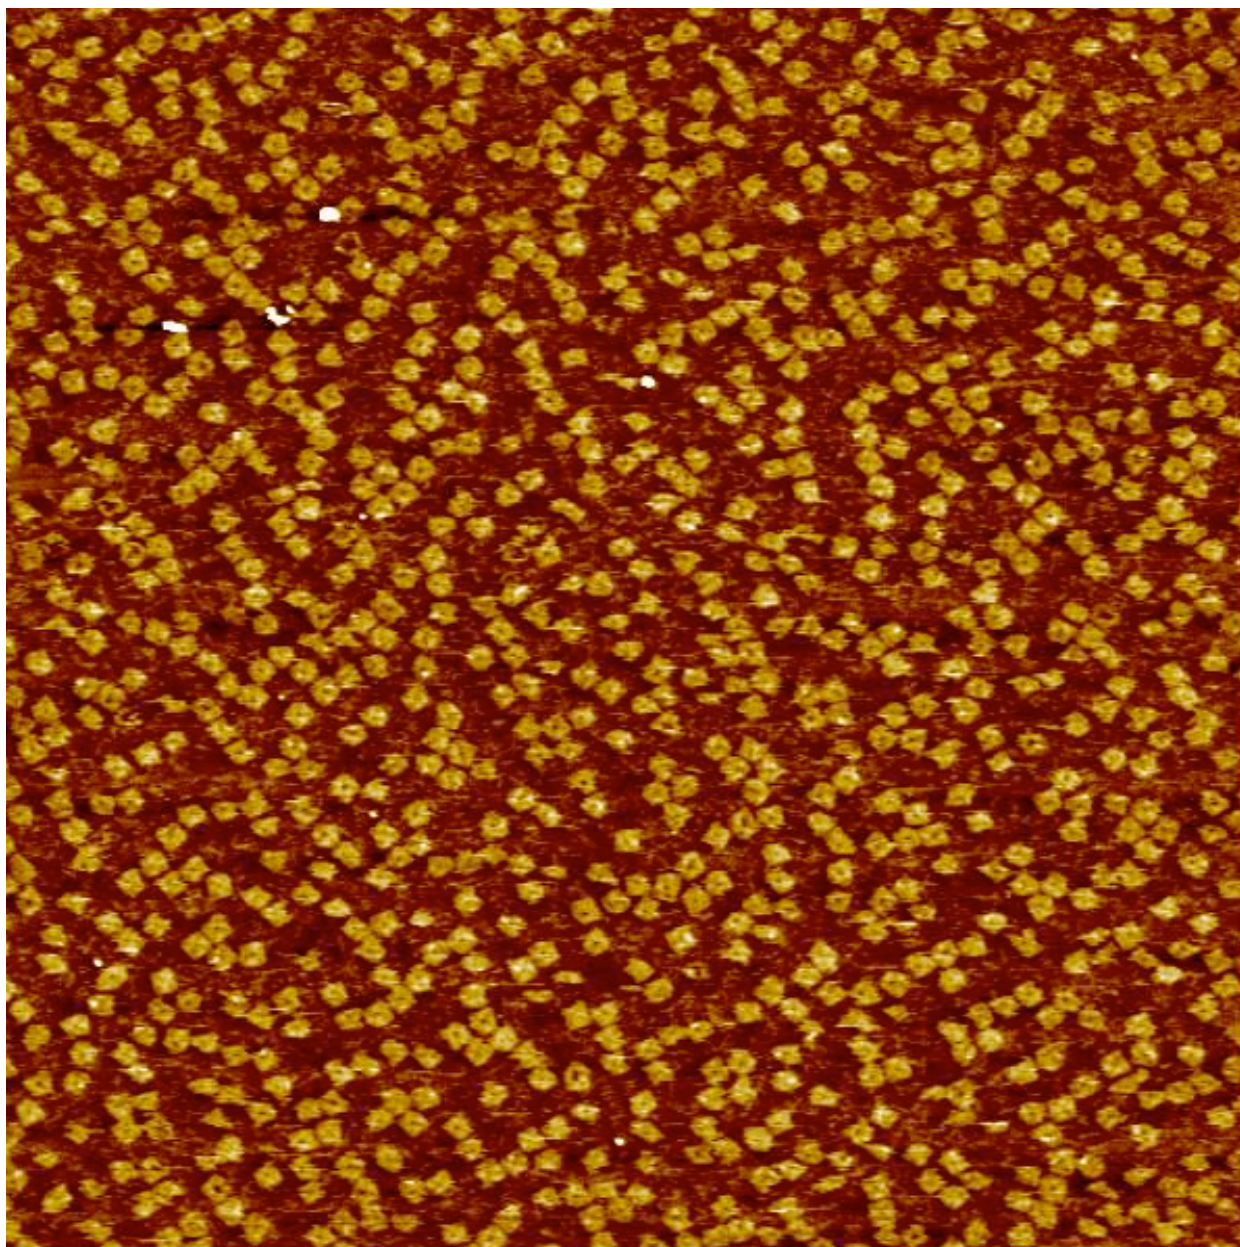

**Figure S17.** Agarose gel electrophoresis result for the diamond shaped DNA Origami.

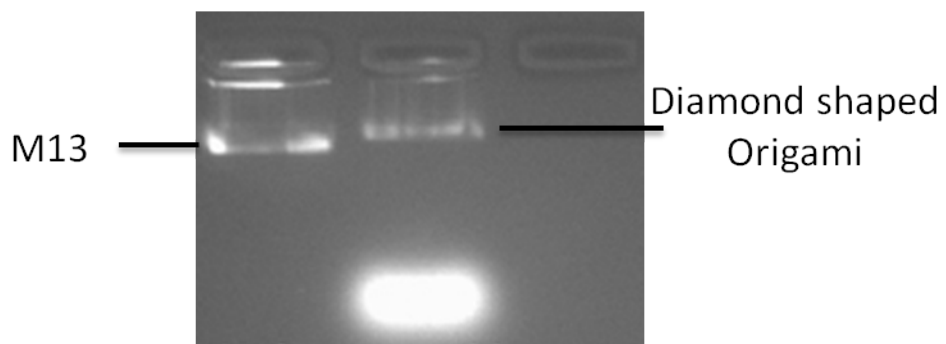

**Figure S18.** Zoom out and zoom in AFM images of the origami super-structures assembled from a mixture of hexagonal and diamond shaped origami into a 3 row closely packed pattern. The size of the zoom out images are  $5\ \mu\text{m} \times 5\ \mu\text{m}$  and the size of the zoom in images are  $400\ \text{nm} \times 400\ \text{nm}$ .

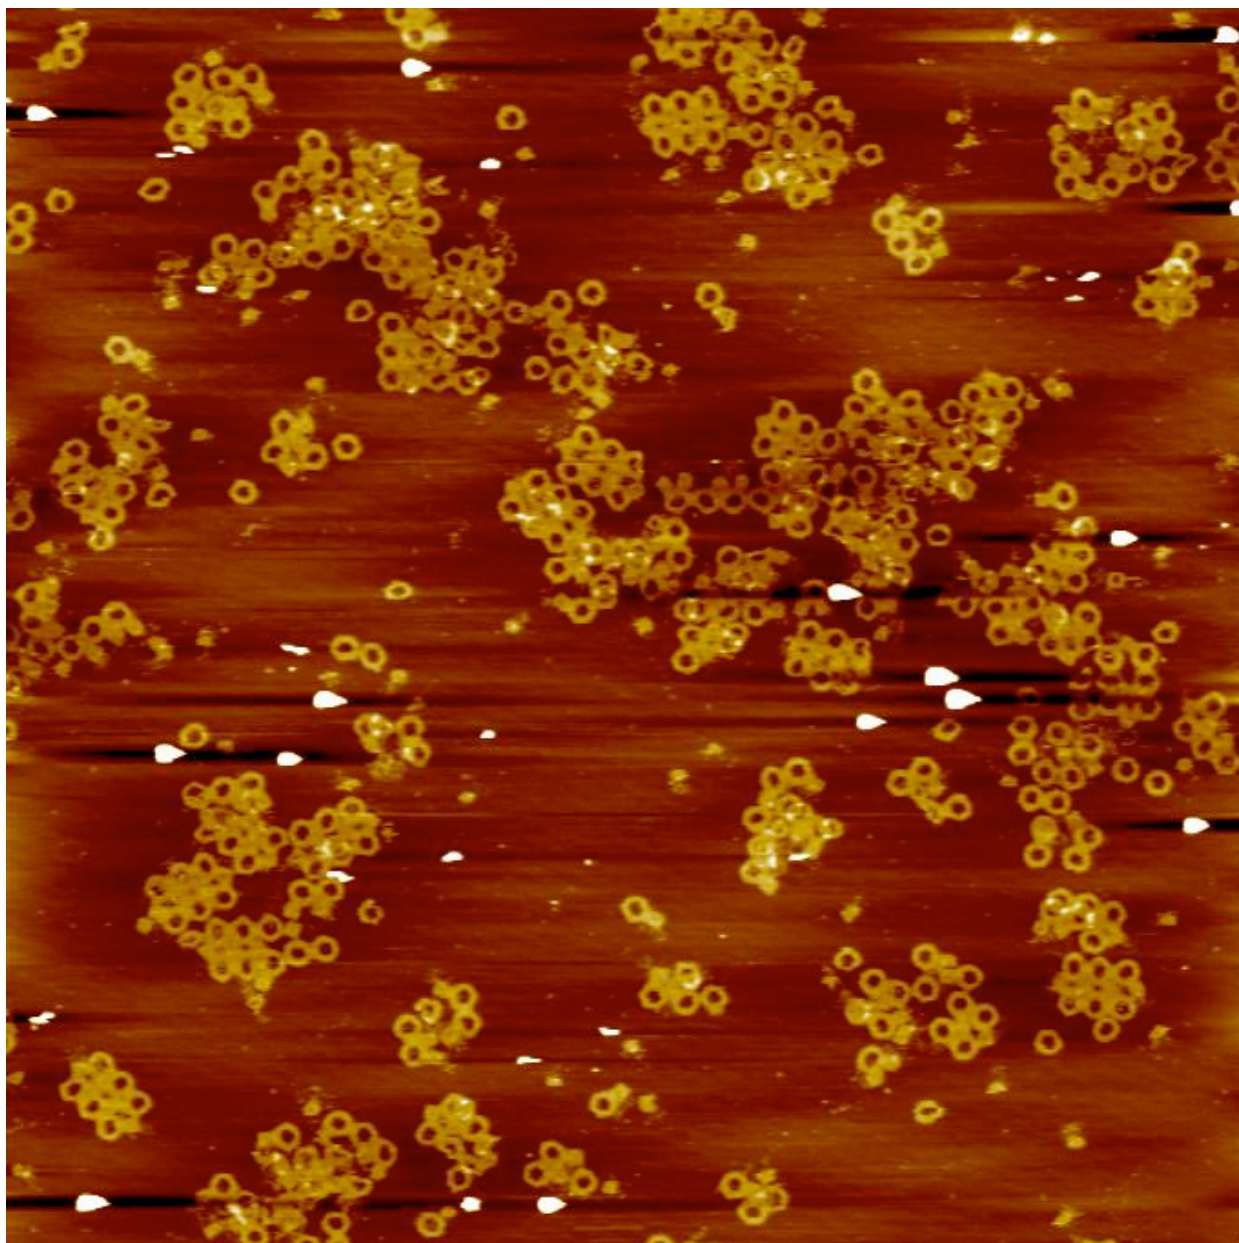

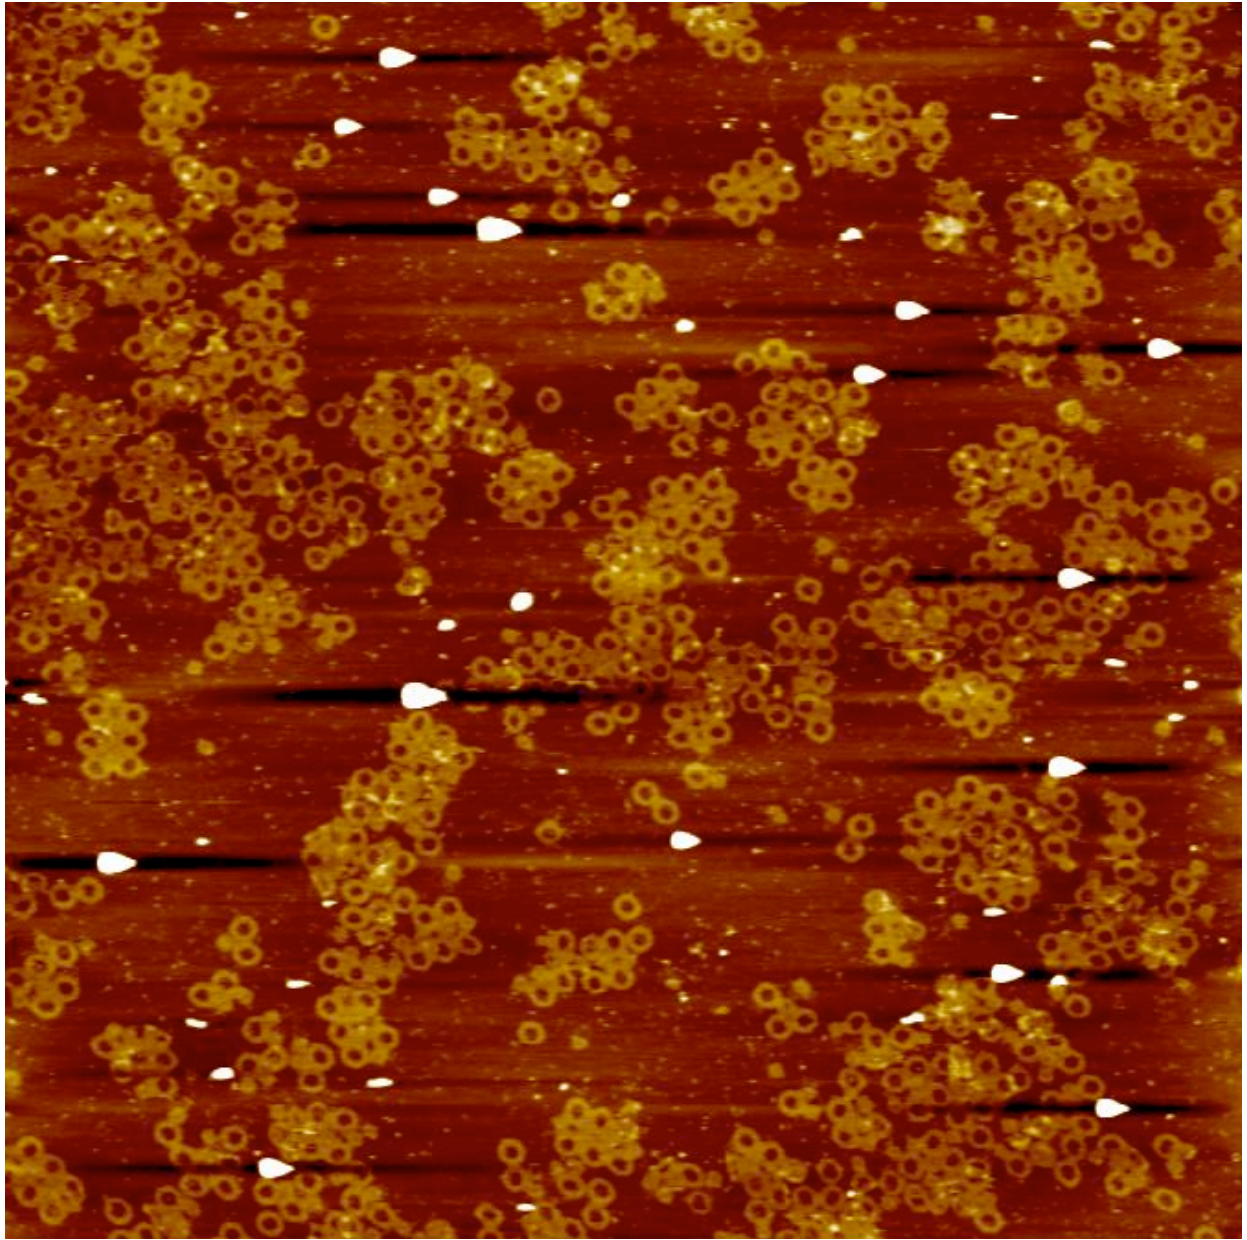

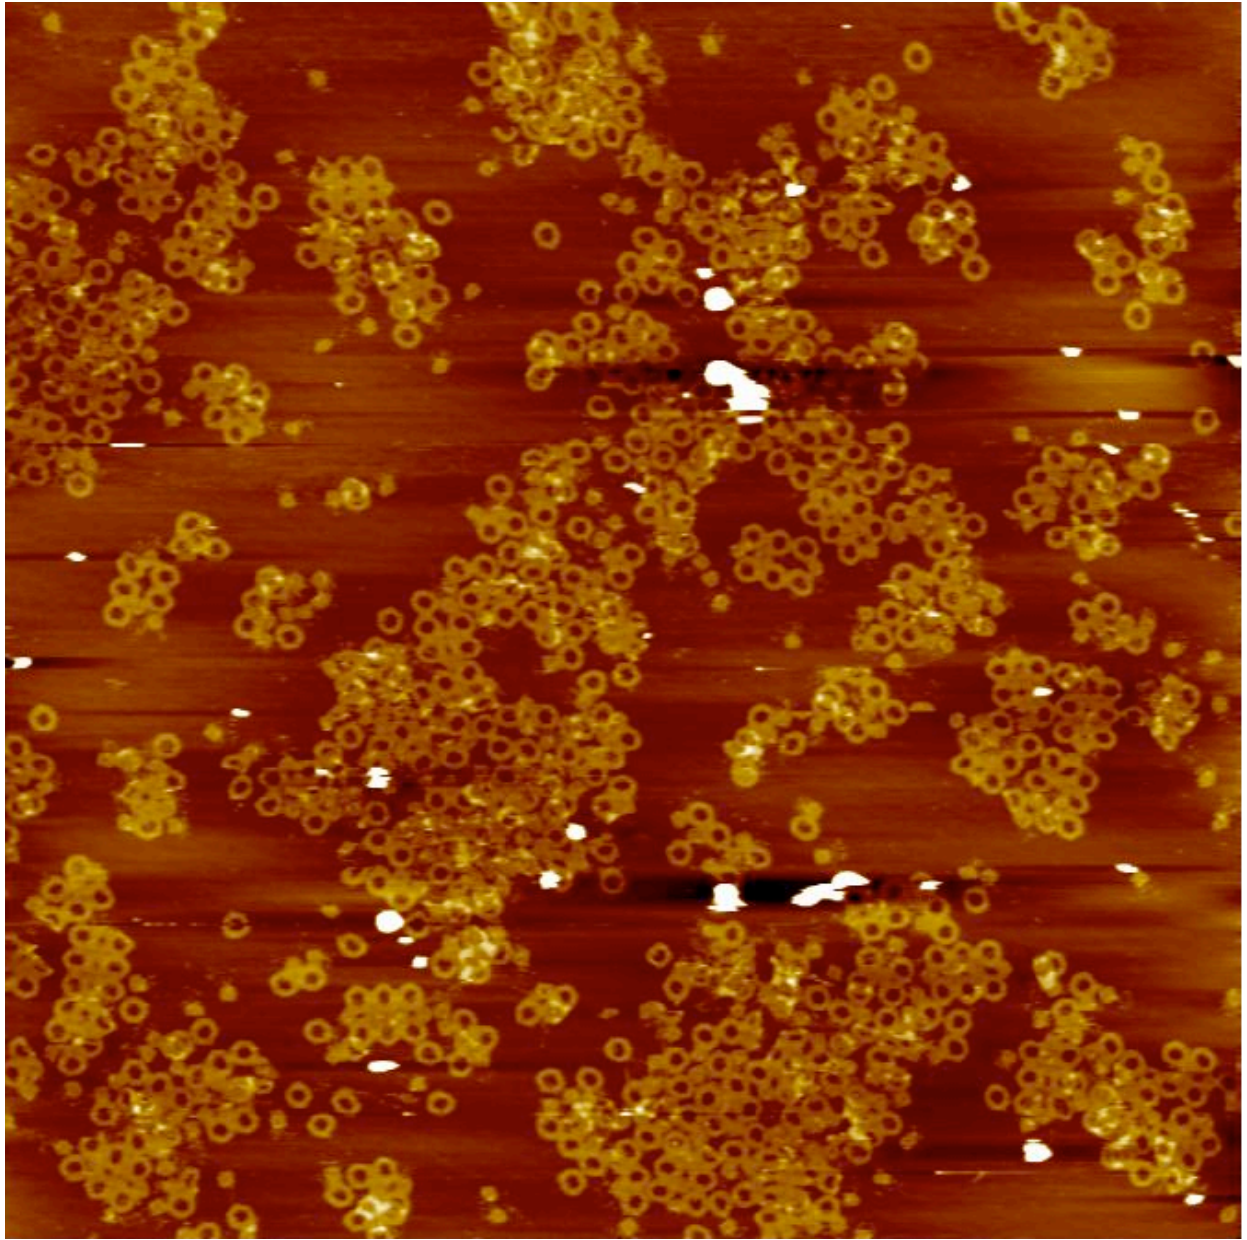

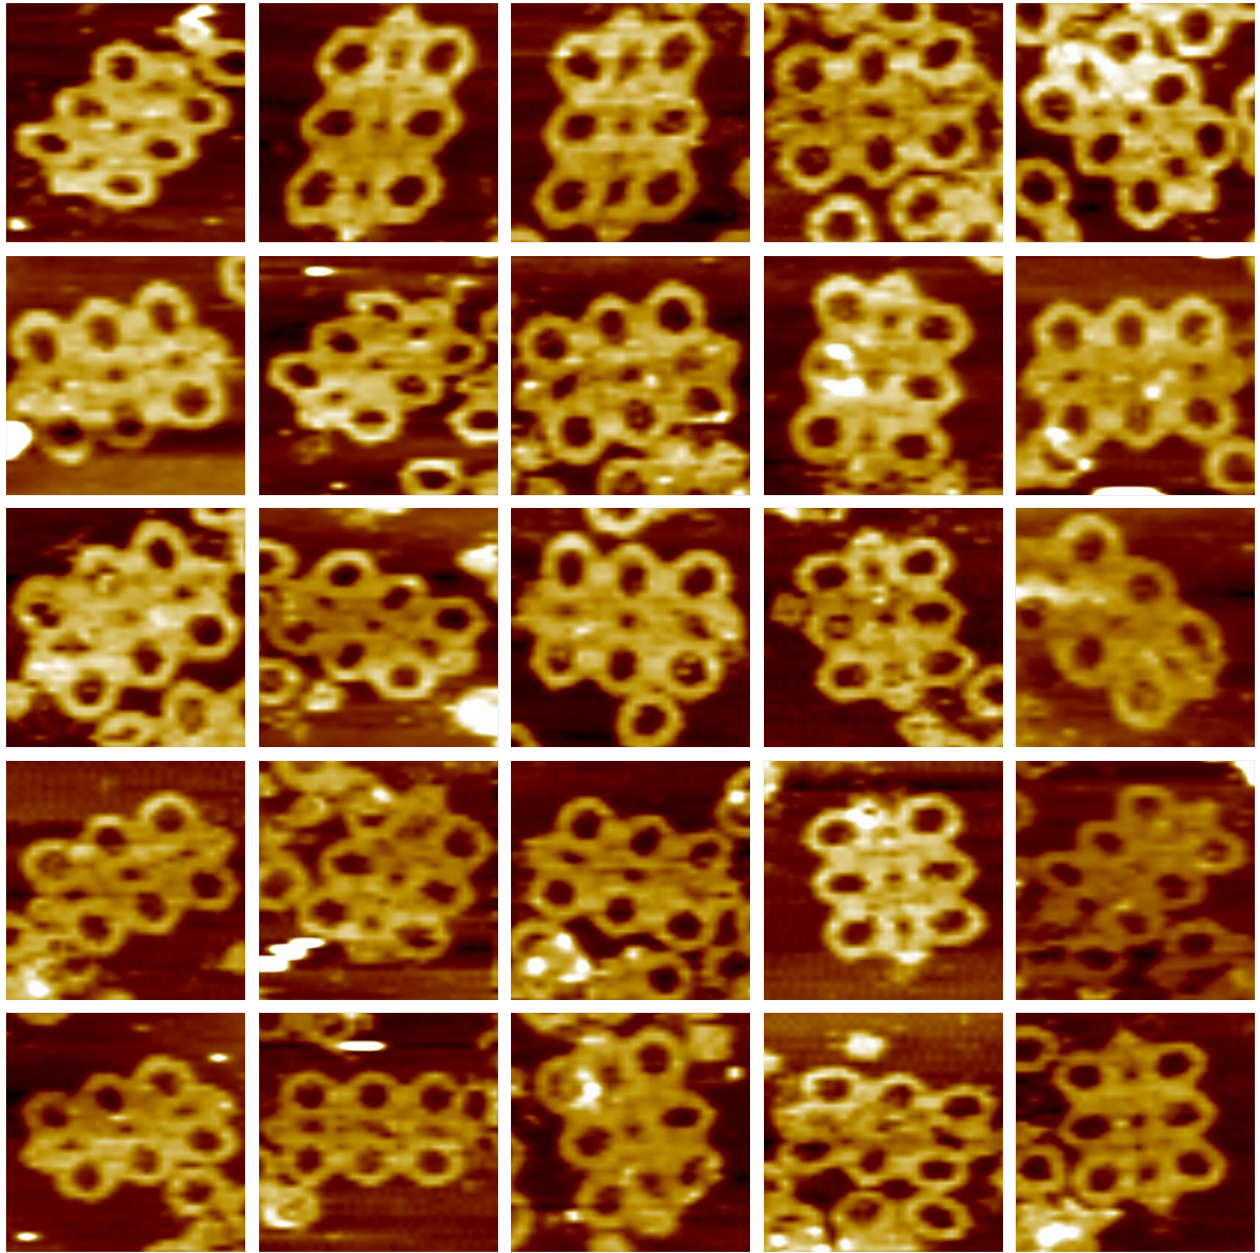

**Figure S19.** AFM images of the pre-formed scaffold frames used in Figure 2 of the main text. The size of each zoom-out AFM image is  $5\text{ }\mu\text{m} \times 5\text{ }\mu\text{m}$ . As these pre-formed scaffold frames are quite flexible, their structures do not appear to be well defined, although branching of the arms can sometimes be seen. Random deposition of these flexible structures onto mica surface and AFM cantilever perturbation of such highly loose structures made it difficult to see the details of these frames, but the branched morphologies suggest that the M13 strand is partially folded. It is possible that the flexible frame and the rigid origami unit tiles serve as scaffolds for each other to cooperatively and collectively assemble into the final super-origami structure.

### Strategy 1

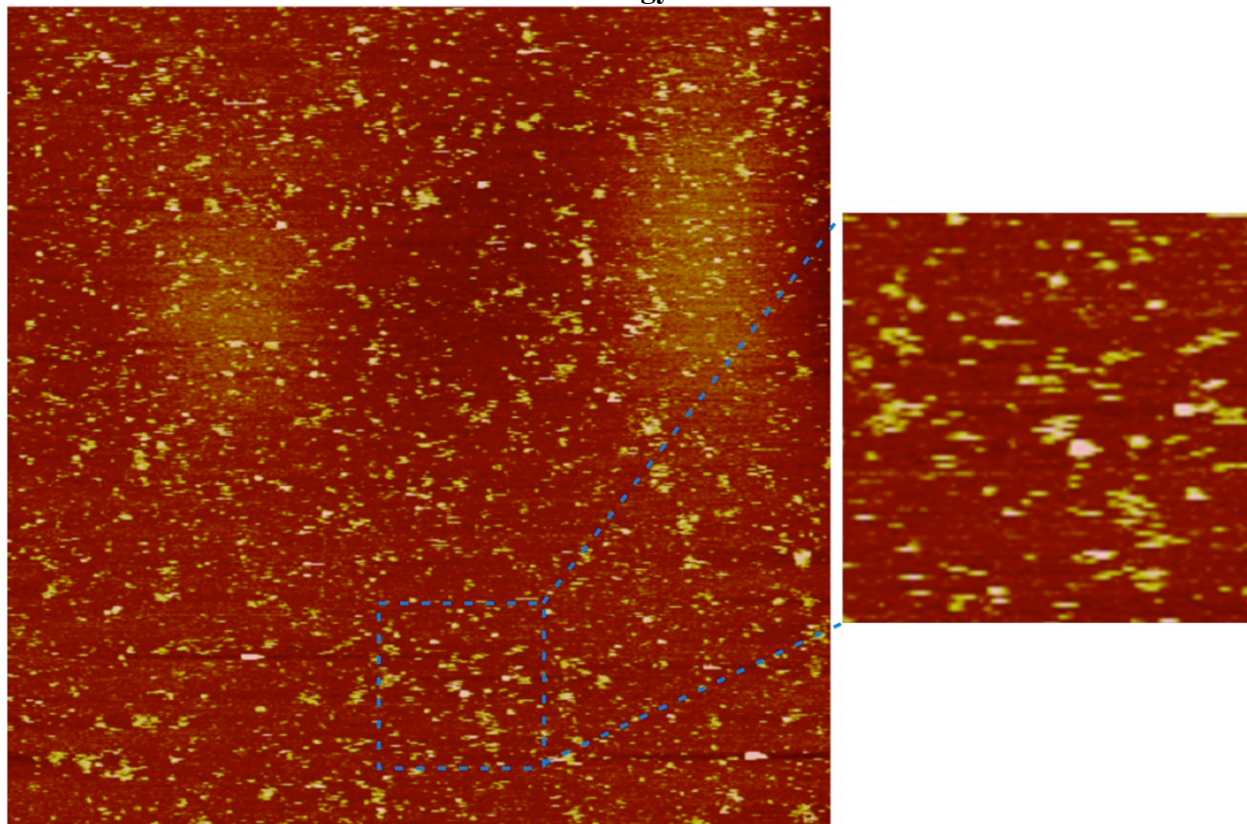



**Strategy 2**

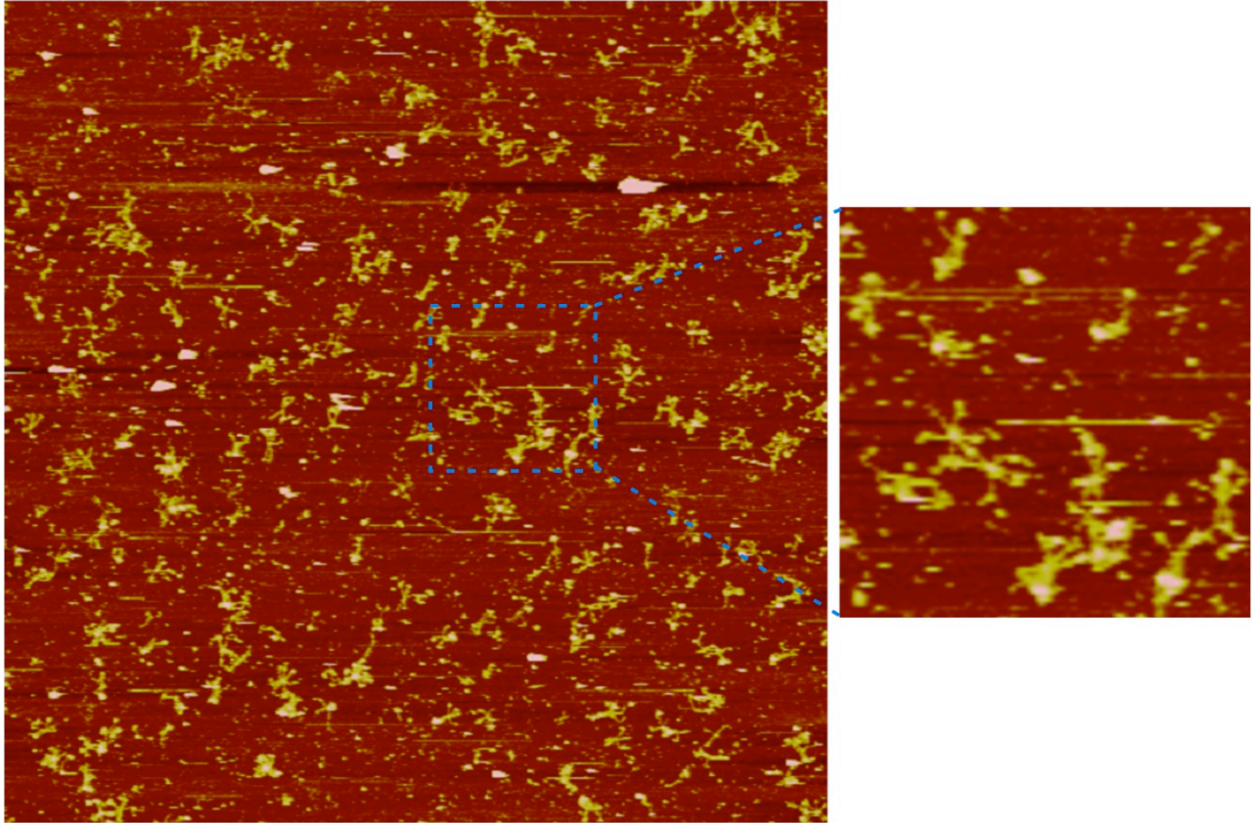

### Strategy 3

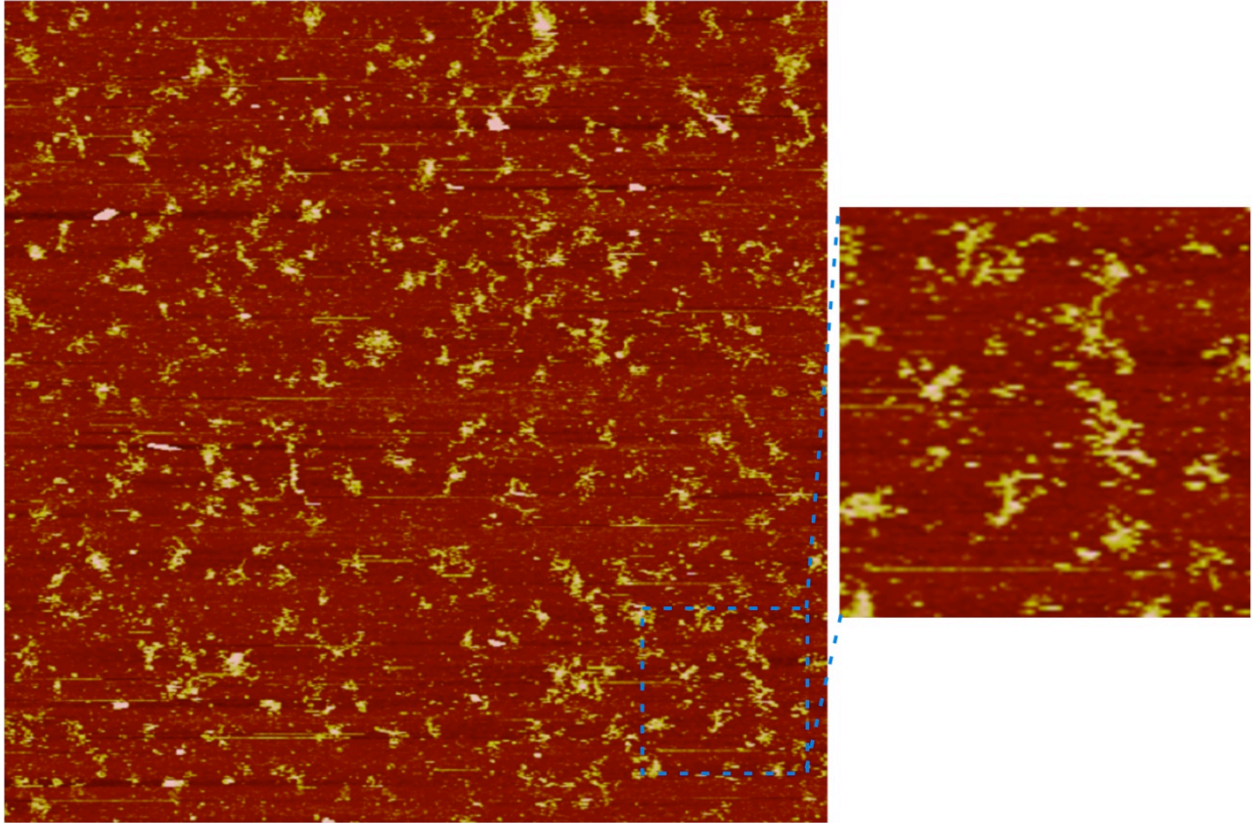

**DNA sequences:**

**Table S1. Unmodified triangle origami staples**

A01, CGGGGTTTCCTCAAGAGAAGGATTTTGAATTA,  
A02, AGCGTCATGTCTCTGAATTTACCGACTACCTT,  
A03, TTCATAATCCCCTTATTAGCGTTTTTCTTACC,  
A04, ATGGTTTATGTCACAATCAATAGATATTA AAC,  
A05, TTTGATGATTAAGAGGCTGAGACTTGCTCAGTACCAGGCG,  
A06, CCGGAACCCAGAATGGAAAGCGCAACATGGCT,  
A07, AAAGACAACATTTTCGGTTCATAGCCAAAATCA,  
A08, GACGGGAGAATTA ACTCGGAATAAGTTTATTTCCAGCGCC,  
A09, GATAAGTGCCGTCGAGCTGAAACATGAAAGTATACAGGAG,  
A10, TGTACTGGAAATCCTCATTAAAGCAGAGCCAC,  
A11, CACCGGAAAGCGCGTTTTTCATCGGAAGGGCGA,  
A12, CATTCAACAAACGCAAAGACACCAGAACCCTGAACAAA,  
A13, TTTAACGGTTCGGAACCTATTATTAGGGTTGATATAAGTA,  
A14, CTCAGAGCATATTCACAAACAAATTAATAAGT,  
A15, GGAGGGAAATTTAGCGTCAGACTGTCCGCCTCC,  
A16, GTCAGAGGGTAATTGATGGCAACATATAAAAGCGATTGAG,  
A17, TAGCCCGGAATAGGTGAATGCCCCCTGCCTATGGTCAGTG,  
A18, CCTTGAGTCAGACGATTGGCCTTGCGCCACCC,  
A19, TCAGAACCCAGAATCAAGTTTGCCGGTAAATA,  
A20, TTGACGGAAATACATACATAAAGGGCGCTAATATCAGAGA,  
A21, CAGAGCCAGGAGGTTGAGGCAGGTAACAGTGCCCG,  
A22, ATTAAGGCCGTAATCAGTAGCGAGCCACCCT,  
A23, GATAACCCACAAGAATGTTAGCAAACGTAGAAAATTATTC,  
A24, GCCGCCAGCATTGACACCACCCTC,  
A25, AGAGCCGCACCATCGATAGCAGCATGAATTAT,  
A26, CACCGTCACCTTATTACGCAGTATTGAGTTAAGCCCAATA,  
A27, AGCCATTTAAACGTCACCAATGAACACCAGAACCA,  
A28, ATAAGAGCAAGAAACATGGCATGATTAAGACTCCGACTTG,  
A29, CCATTAGCAAGGCCGGGGGAATTA,  
A30, GAGCCAGCGAATACCCAAAAGAACATGAAATAGCAATAGC,  
A31, TATCTTACCGAAGCCCAAACGCAATAATAACGAAAATCACCAG,  
A32, CAGAAGGAAACCGAGGTTTTTTAAGAAAAGTAAGCAGATAGCCG,  
A33, CCTTTTTTCATTTAACAATTTTCATAGGATTAG,  
A34, TTTAACCTATCATAGGTCTGAGAGTTCCAGTA,  
A35, AGTATAAAATATGCGTTATACAAAGCCATCTT,  
A36, CAAGTACCTCATTCCAAGAACGGGAAATTCAT,  
A37, AGAGAATAACATAAAAACAGGGGAAGCGCATTAA,  
A38, AAAACAAAATTAATTAATGGAAACAGTACATTAGTGAAT,  
A39, TTATCAAACCGGCTTAGGTTGGGTAAGCCTGT,  
A40, TTAGTATCGCCAACGCTCAACAGTCGGCTGTC,  
A41, TTTCCCTTAGCACTCATCGAGAACAATAGCAGCCTTTACAG,  
A42, AGAGTCAAAAATCAATATATGTGATGAAACAAACATCAAG,  
A43, ACTAGAAATATATAACTATATGTACGCTGAGA,

A44, TCAATAATAGGGCTTAATTGAGAATCATAATT,  
A45, AACGTCAAAAATGAAAAGCAAGCCGTTTTTATGAAACCAA,  
A46, GAGCAAAAGAAGATGAGTGAATAACCTTGCTTATAGCTTA,  
A47, GATTAAGAAATGCTGATGCAAATCAGAATAAA,  
A48, CACCGGAATCGCCATATTTAACAAAATTTACG,  
A49, AGCATGTATTTTCATCGTAGGAATCAAACGATTTTTTTGTTT,  
A50, ACATAGCGCTGTAAATCGTCGCTATTCATTTCAATTACCT,  
A51, GTTAAATACAATCGCAAGACAAAGCCTTGAAA,  
A52, CCCATCCTCGCCAACATGTAATTTAATAAGGC,  
A53, TCCCAATCCAAATAAGATTACCGCGCCAATAAATAATAT,  
A54, TCCCTTAGAATAACGCGAGAAAACCTTTTACCGACC,  
A55, GTGTGATAAGGCAGAGGCATTTTCAGTCCTGA,  
A56, ACAAGAAAGCAAGCAAATCAGATAACAGCCATATTATTTA,  
A57, GTTTGAAATTCAAATATATTTTAG,  
A58, AATAGATAGAGCCAGTAATAAGAGATTTAATG,  
A59, GCCAGTTACAAAATAATAGAAGGCTTATCCGGTTATCAAC,  
A60, TTCTGACCTAAAATATAAAGTACCGACTGCAGAAC,  
A61, GCGCCTGTTATTCTAAGAACGCGATTCCAGAGCCTAATTT,  
A62, TCAGCTAAAAAAGGTAAAGTAATT,  
A63, ACGCTAACGAGCGTCTGGCGTTTTAGCGAACCCAACATGT,  
A64, ACGACAATAAATCCCGACTTGCGGGAGATCCTGAATCTTACCA,  
A65, TGCTATTTTGCACCCAGCTACAATTTTGTTTTGAAGCCTTAAA,

B01, TCATATGTGTAATCGTAAAACCTAGTCATTTTC,  
B02, GTGAGAAAATGTGTAGGTAAAGATACAACCTTT,  
B03, GGCATCAAATTTGGGGCGCGAGCTAGTTAAAG,  
B04, TTCGAGCTAAGACTTCAAATATCGGGAACGAG,  
B05, ACAGTCAAAGAGAATCGATGAACGACCCCGGTTGATAATC,  
B06, ATAGTAGTATGCAATGCCTGAGTAGGCCGGAG,  
B07, AACCAGACGTTTAGCTATATTTTCTTCTACTA,  
B08, GAATACCACATTCAACTTAAGAGGAAGCCCGATCAAAGCG,  
B09, AGAAAAGCCCCAAAAGAGTCTGGAGCAAACAATCACCAT,  
B10, CAATATGACCCTCATATATTTTAAAGCATTAA,  
B11, CATCCAATAAATGGTCAATAACCTCGGAAGCA,  
B12, AACTCCAAGATTGCATCAAAAAGATAATGCAGATACATAA,  
B13, CGTTCTAGTCAGGTCATTGCCTGACAGGAAGATTGTATAA,  
B14, CAGGCAAGATAAAAATTTTTAGAAATATTCAAC,  
B15, GATTAGAGATTAGATACATTTTCGCAAATCATA,  
B16, CGCCAAAAGGAATTACAGTCAGAAGCAAAGCGCAGGTCAG,  
B17, GCAAATATTTAAATTGAGATCTACAAAGGCTACTGATAAA,  
B18, TTAATGCCTTATTTCAACGCAAGGGCAAAGAA,  
B19, TTAGCAAATAGATTTAGTTTTGACCAGTACCTT,  
B20, TAATTGCTTTACCCTGACTATTATGAGGCATAGTAAGAGC,  
B21, ATAAAGCCTTTGCGGGAGAAGCCTGGAGAGGGTAG,  
B22, TAAGAGGTCAATTCTGCGAACGAGATTAAGCA,

B23, AACACTATCATAACCCATCAAAAATCAGGTCTCCTTTTGA,  
B24, ATGACCCTGTAATACTTCAGAGCA,  
B25, TAAAGCTATATAACAGTTGATTCCCATTTTTG,  
B26, CGGATGGCACGAGAATGACCATAATCGTTTACCAGACGAC,  
B27, TAATTGCTTGGAAGTTTCATTCCAAATCGGTTGTA,  
B28, GATAAAAACCAAATATTAACAGTTCAGAAATTAGAGCT,  
B29, ACTAAAGTACGGTGTCTGAATATAA,  
B30, TGCTGTAGATCCCCCTCAAATGCTGCGAGAGGCTTTTTGCA,  
B31, AAAGAAGTTTTGCCAGCATAAATATTCATTGACTCAACATGTT,  
B32, AATACTGCGGAATCGTAGGGGGTAATAGTAAAATGTTTAGACT,  
B33, AGGGATAGCTCAGAGCCACCACCCCATGTCAA,  
B34, CAACAGTTTATGGGATTTTGCTAATCAAAGG,  
B35, GCCGCTTTGCTGAGGCTTGCAGGGGAAAAGGT,  
B36, GCGCAGACTCCATGTTACTTAGCCCGTTTTAA,  
B37, ACAGGTAGAAAGATTCATCAGTTGAGATTTAG,  
B38, CCTCAGAACCGCCACCCAAGCCCAATAGGAACGTAAATGA,  
B39, ATTTTCTGTCAGCGGAGTGAGAATACCGATAT,  
B40, ATTCGGTCTGCGGGATCGTCACCCGAAATCCG,  
B41, CGACCTGCGGTCAATCATAAGGGAACGGAACAACATTATT,  
B42, AGACGTTACCATGTACCGTAACACCCCTCAGAACCGCCAC,  
B43, CACGCATAAGAAAGGAACAATAAGTCTTTCC,  
B44, ATGTGTCTCAGCAGCGAAAGACACCATCGCC,  
B45, TTAATAAAACGAACTAACCGAACTGACCAACTCCTGATAA,  
B46, AGGTTTAGTACCGCCATGAGTTTCGTCACCAGGATCTAAA,  
B47, GTTTTGTCAGGAATTGCGAATAATCCGACAAT,  
B48, GACAACAAGCATCGGAACGAGGGTGAGATTTG,  
B49, TATCATCGTTGAAAGAGGACAGATGGAAGAAAAATCTACG,  
B50, AGCGTAACTACAACTACAACGCCTATCACCGTACTCAGG,  
B51, TAGTTGCGAATTTTTTCACGTTGATCATAGTT,  
B52, GTACAACGAGCAACGGCTACAGAGGATACCGA,  
B53, ACCAGTCAGGACGTTGGAACGGTGTACAGACCGAAACAAA,  
B54, ACAGACAGCCCAAATCTCCAAAAAAAATTTCTTA,  
B55, AACAGCTTGCTTTGAGGACTAAAGCGATTATA,  
B56, CCAAGCGCAGGCGCATAGGCTGGCAGAACTGGCTCATTAT,  
B57, CGAGGTGAGGCTCCAAAAGGAGCC,  
B58, ACCCCCAGACTTTTTTCATGAGGAACTTGCTTT,  
B59, ACCTTATGCGATTTTATGACCTTCATCAAGAGCATCTTTG,  
B60, CGGTTTATCAGGTTTCCATTAAACGGGAATACACT,  
B61, AAAACACTTAATCTTGACAAGA ACTTAATCATTGTGAATT,  
B62, GGCAAAAAGTAAAATACGTAATGCC,  
B63, TGGTTTAATTTCAACTCGGATATTCATTACCCACGAAAGA,  
B64, ACCAACCTAAAAAATCAACGTAACAAATAAATTGGGCTTGAGA,  
B65, CCTGACGAGAAACACCAGAACGAGTAGGCTGCTCATTAGTGA,  
Link-A1C, TTAATTAATTTTTTACCATATCAAA,  
Link-A2C, TTAATTTTCATCTTAGACTTTACAA,  
Link-A3C, CTGTCCAGACGTATACCGAACGA,

Link-A4C, TCAAGATTAGTGTAGCAATACT,  
Link-B1A, TGTAGCATTTCCTTTTATAAACAGTT,  
Link-B2A, TTTAATTGTATTTCCACCAGAGCC,  
Link-B3A, ACTACGAAGGCTTAGCACCATTA,  
Link-B4A, ATAAGGCTTGCAACAAAGTTAC,  
Link-C1B, GTGGGAACAAATTTCTATTTTTGAG,  
Link-C2B, CGGTGCGGGCCTTCCAAAAACATT,  
Link-C3B, ATGAGTGAGCTTTTAAATATGCA,  
Link-C4B, ACTATTAAAGAGGATAGCGTCC,  
Loop, GCGCTTAATGCGCCGCTACAGGGC,

C01, TCGGGAGATATACAGTAACAGTACAAATAATT,  
C02, CCTGATTAAAGGAGCGGAATTATCTCGGCCTC,  
C03, GCAAATCACCTCAATCAATATCTGCAGGTCGA,  
C04, CGACCAGTACATTGGCAGATTCACCTGATTGC,  
C05, TGGCAATTTTTAACGTCAGATGAAAACAATAACGGATTCG,  
C06, AAGGAATTACAAAGAAACCACCAGTCAGATGA,  
C07, GGACATTCACCTCAAATATCAAACACAGTTGA,  
C08, TTGACGAGCACGTATACTGAAATGGATTATTTAATAAAAAG,  
C09, CCTGATTGCTTTGAATTGCGTAGATTTTCAGGCATCAATA,  
C10, TAATCCTGATTATCATTTTGCGGAGAGGAAGG,  
C11, TTATCTAAAGCATCACCTTGCTGATGGCCAAC,  
C12, AGAGATAGTTTGACGCTCAATCGTACGTGCTTTCCTCGTT,  
C13, GATTATACACAGAAATAAAGAAATACCAAGTTACAAAATC,  
C14, TAGGAGCATAAAAAGTTTGAGTAACATTGTTTG,  
C15, TGACCTGACAAATGAAAAATCTAAAATATCTT,  
C16, AGAATCAGAGCGGGAGATGGAAATACCTACATAACCCTTC,  
C17, GCGCAGAGGCGAATTAATTATTTGCACGTAAATTCTGAAT,  
C18, AATGGAAGCGAACGTTATTAATTTCTAACAAC,  
C19, TAATAGATCGCTGAGAGCCAGCAGAAGCGTAA,  
C20, GAATACGTAAACAGGAAAAACGCTCCTAAACAGGAGGCCGA,  
C21, TCAATAGATATTAATCCTTTGCCGGTTAGAACCT,  
C22, CAATATTTGCCTGCAACAGTGCCATAGAGCCG,  
C23, TTAAAGGGATTTTAGATACCGCCAGCCATTGCGGCACAGA,  
C24, ACAATTCGACAACCTCGTAATACAT,  
C25, TTGAGGATGGTCAGTATTAACACCTTGAATGG,  
C26, CTATTAGTATATCCAGAACAATATCAGGAACGGTACGCCA,  
C27, CGCGAACTAAAACAGAGGTGAGGCTTAGAAGTATT,  
C28, GAATCCTGAGAAGTGTATCGGCCTTGCTGGTACTTTAATG,  
C29, ACCACCAGCAGAAGATGATAGCCC,  
C30, TAAAACATTAGAAGAACTCAAACCTTTTTATAATCAGTGAG,  
C31, GCCACCGAGTAAAAGAACATCACTTGCCCTGAGCGCCATTAATAA,  
C32, TCTTTGATTAGTAATAGTCTGTCCATCACGCAAATTAACCGTT,  
C33, CGCGTCTGATAGGAACGCCATCAACTTTTACA,

C34, AGGAAGATGGGGACGACGACAGTAATCATATT,  
 C35, CTCTAGAGCAAGCTTGCATGCCTGGTCAGTTG,  
 C36, CCTTCACCGTGAGACGGGCAACAGCAGTCACA,  
 C37, CGAGAAAGGAAGGGAAGCGTACTATGGTTGCT,  
 C38, GCTCATTTTTTAACCAGCCTTCCTGTAGCCAGGCATCTGC,  
 C39, CAGTTTGACGCACTCCAGCCAGCTAAACGACG,  
 C40, GCCAGTGCATCCCCGGGTACCGAGTTTTTCT,  
 C41, TTTACCAGCCTGGCCCTGAGAGAAAGCCGGCGAACGTGG,  
 C42, GTAACCGTCTTTCATCAACATTAATAATTTTTGTAAATCA,  
 C43, ACGTTGTATTCCGGCACCGCTTCTGGCGCATC,  
 C44, CCAGGGTGGCTCGAATTCGTAATCCAGTCACG,  
 C45, TAGAGCTTGACGGGGAGTTGCAGCAAGCGGTCATTGGGGCG,  
 C46, GTTAAAATTCGCATTAATGTGAGCGAGTAACACACGTTGG,  
 C47, TGTAGATGGGTGCCGGAACCAGGAACGCCAG,  
 C48, GGTTTTCCATGGTCATAGCTGTTTGAGAGGCG,  
 C49, GTTTGCGTCACGCTGGTTTGCCCCAAGGGAGCCCCGATT,  
 C50, GGATAGGTACCCGTCGGATTCTCCTAAACGTTAATATTTT,  
 C51, AGTTGGGTCAAAGCGCCATTCGCCCCGTAATG,  
 C52, CGCGCGGGCCTGTGTGAAATTGTTGGCGATTA,  
 C53, CTAAATCGGAACCCTAAGCAGGCGAAAATCCTTCGGCCAA,  
 C54, CGGCGGATTGAATTCAGGCTGCGCAACGGGGGATG,  
 C55, TGCTGCAAATCCGCTCACAATTCCCAGCTGCA,  
 C56, TTAATGAAGTTTGATGGTGGTTCCGAGGTGCCGTAAAGCA,  
 C57, TGGCGAAATGTTGGGAAGGGCGAT,  
 C58, TGTCGTGCACACAACATACGAGCCACGCCAGC,  
 C59, CAAGTTTTTTGGGGTCGAAATCGGCAAAATCCGGGAAACC,  
 C60, TCTTCGCTATTGGAAGCATAAAGTGTATGCCCGCT,  
 C61, TTCCAGTCCTTATAAATCAAAGAGAACCATCACCCAAAT,  
 C62, GCGCTCACAAGCCTGGGGTGCCTA,  
 C63, CGATGGCCCACTACGTATAGCCCGAGATAGGGATTGCGTT,  
 C64, AACTCACATTATTGAGTGTTGTTCCAGAAACCGTCTATCAGGG,  
 C65, ACGTGGACTCCAACGTCAAAGGGCGAATTTGGAACAAGAGTCC,

**Table S2. Triangle origami modified staples and bridges that hybridize with  $\Phi$ X 174 scaffolds for design 1**

**Modified helpers for each triangle origami**

6B Part

6B32;AATACTGCGGAATCGTAGGGGGTAATAGTAAACATGGTCA  
 6B31-1;TAACAGTCAAAGAAGTTTTGCCAGCATAAATA  
 6B30;TGCTGTAGATCCCCCTCAAATGCTGCGAGAGGCTTTTGCAGGGAGAGG  
 6B28-1;TCCTTCATGATAAAAACCAAATATTAACAG  
 6B26;CGGATGGCACGAGAATGACCATAATCGTTTACCAGACGACGAACTTAA  
 6B23-1;AACGTGACAACACTATCATAACCCATCAAAAA  
 6B20;TAATTGCTTTACCCTGACTATTATGAGGCATAGTAAGAGCGATGAGGG  
 6B16-1;TGTCTACACGCCAAAAGGAATTACAGTCAGAA  
 6B12;AACTCCAAGATTGCATCAAAAAGATAATGCAGATACATAAGTAGAGTC

6B08-1;CGCAATGGGAATACCACATTCAACTTAAGAGG  
6B37;GTCCATCTACAGGTAGAAAGATTCATCAGTTGAGATTTAGAGAAAGAC  
6B41;CGACCTGCGGTCAATCATAAGGGAACGGAACAACATTATTCGAAGGAG  
6B45-1;GAGTAGTTTTAATAAAAACGAACTAACCGAACT  
6B49;TATCATCGTTGAAAGAGGACAGATGGAAGAAAAATCTACGGAAATGGT  
6B53-1;TGACCAGCACCAGTCAGGACGTTGGAACGGTG  
6B56;CCAAGCGCAGGCGCATAGGCTGGCAGAAGTGGCTCATTATAAGGAAGC  
6B59-1;ATGCGGCAACCTTATGCGATTTTATGACCTTC  
6B61;AAAACACTTAATCCTTGACAAGAAGTAAATCATTGTGAATTTACGCTCG  
6B63-1;TAGACATATGGTTTAATTTCAACTCGGATATT  
6B64;ACCAACCTAAAAAATCAACGTAACAAATAAATTTGGGCTTGAGAATTTATCC  
6B65;AGCCCCTGACACCAGAACGAGTAGGCTGCTCATTAGTGA

#### 6A Part

6A32;CAGAAGGAAACCGAGGTTTTTAAGAAAAGTAAACCACCTA  
6A31-1;GCCTTTACTATCTTACCGAAGCCCAAACGCAA  
6A30;GAGCCAGCGAATACCCAAAAGAACATGAAATAGCAATAGCGCTTGCCT  
6A28-1;GCTGCGGAATAAGAGCAAGAAACATGGCATGA  
6A26;CACCGTCACCTTATTACGCAGTATTGAGTTAAGCCCAATACGACCAGG  
6A23-1;TTTTTACCGATAACCCACAAGAATGTTAGCAA  
6A20;TTGACGGAAATACATACATAAAGGGCGCTAATATCAGAGATTTAGACA  
6A16-1;GCACGTAAGTCAGAGGGTAATTGATGGCAACA  
6A12;CATTCAACAAACGCAAAGACACCAGAACACCCTGAACAAATTTTTGAC  
6A08-1;GTCAGTAAGACGGGAGAATTAACCTCGGAATAA  
6A37;CACGCAAGAGAGAATAACATAAAAACAGGGAAGCGCATTAGAACGTCA  
6A41;TTTCCTTAGCACTCATCGAGAACAATAGCAGCCTTTACAGGTAAACGC  
6A45-1;TTAACCGGAACGTCAAAAATGAAAAGCAAGCC  
6A49;AGCATGTATTTTCATCGTAGGAATCAAACGATTTTTTTGTTTACGCTCGA  
6A53-1;TTCCGTAATCCCAATCCAAATAAGATTACCGC  
6A56;ACAAGAAAGCAAGCAAATCAGATAACAGCCATATTATTTAATTCAGCG  
6A59-1;AGGCCGTTGCCAGTTACAAAATAATAGAAGGC  
6A61;GCGCCTGTTATTCTAAGAACGCGATTCCAGAGCCTAATTTTGAATGTT  
6A63-1;TAAGCAATACGCTAACGAGCGTCTGGCGTTTT  
6A64;ACGACAATAAATCCCGACTTGCGGGAGATCCTGAATCTTACCAGACGGCAG  
6A65;AGCAGGAAACCCAGCTACAATTTTGTTTTGAAGCCTTAA

#### 5B Part

5B32;AATACTGCGGAATCGTAGGGGGTAATAGTAAAAGCGAGGG  
5B31-1;GCGTACCAAAGAAGTTTTGCCAGCATAAATA  
5B30;TGCTGTAGATCCCCCTCAAATGCTGCGAGAGGCTTTTGCATAAACGCA  
5B28-1;CGAGCACGGATAAAAACCAAATATTAACAG  
5B26;CGGATGGCACGAGAATGACCATAATCGTTTACCAGACGACAGAGCGGT  
5B23-1;TTTGTTACAACACTATCATAACCCATCAAAAA  
5B20;TAATTGCTTTACCCTGACTATTATGAGGCATAGTAAGAGCTCGTCAGA  
5B16-1;CGGTTAAACGCCAAAAGGAATTACAGTCAGAA  
5B12;AACTCCAAGATTGCATCAAAAAGATAATGCAGATACATAATCCAAAAC



5B08-1;AGCTTAATGAATACCACATTCAACTTAAGAGG  
5B37;TACGGATTACAGGTAGAAAGATTCATCAGTTGAGATTTAGAGAGGCCA  
5B41;CGACCTGCGGTCAATCATAAGGGAACGGAACAACATTATTGTTTCAGTA  
5B45-1;CTTACCTATTAATAAAAACGAACTAACCGAACT  
5B49;TATCATCGTTGAAAGAGGACAGATGGAAGAAAAATCTACGTTAGTGGT  
5B53-1;CAGATAGTACCAGTCAGGACGTTGGAACGGTG  
5B56;CCAAGCGCAGGCGCATAGGCTGGCAGAAGTGGCTCATTATAATCCACG  
5B59-1;ACAAGAGAACCTTATGCGATTTTATGACCTTC  
5B61;AAAACACTTAATCCTTGACAAGAAGTAAATCATTGTGAATTATCTCTAC  
5B63-1;CTCATATCTGGTTTAATTTCAACTCGGATATT  
5B64;ACCAACCTAAAAAATCAACGTAACAAATAAATTGGGCTTGAGATAAACCCAG  
5B65;CAAGCATAACACCAGAACGAGTAGGCTGCTCATTTCAGTGA

#### 5A Part

5A32;CAGAAGGAAACCGAGGTTTTTAAGAAAAGTAATCATCCAA  
5A31-1;AGAATCGTTATCTTACCGAAGCCCAAACGCAA  
5A30;GAGCCAGCGAATACCCAAAAGAACATGAAATAGCAATAGCTAGTTGAT  
5A28-1;GTAAGAGCATAAGAGCAAGAAACATGGCATGA  
5A26;CACCGTCACCTTATTACGCAGTATTGAGTTAAGCCCAATATTCTCGAG  
5A23-1;CGAATTTTGATAACCCACAAGAATGTTAGCAA  
5A20;TTGACGGAAATACATACATAAAGGGCGCTAATATCAGAGACTCATTTT  
5A16-1;TCGATTTAGTCAGAGGGTAATTGATGGCAACA  
5A12;CATTCAACAAACGCAAAGACACCAGAACACCCTGAACAAAATTCGTAA  
5A08-1;CCTGCTTTGACGGGAGAATTAACCTCGGAATAA  
5A37;AGAAATATAGAGAATAACATAAAAACAGGGAAGCGCATTAAATCAAGAT  
5A41;TTTCTTAGCACTCATCGAGAACAATAGCAGCCTTTACAGCCGAAAGT  
5A45-1;TGGAAGCGAACGTCAAAAATGAAAAGCAAGCC  
5A49;AGCATGTATTTTCATCGTAGGAATCAAACGATTTTTTTGTTTATAAAACT  
5A53-1;CCAATCATTCCCAATCCAATAAGATTACCGC  
5A56;ACAAGAAAGCAAGCAAATCAGATAACAGCCATATTATTTATTTTATCG  
5A59-1;GAGCAGATGCCAGTTACAAAATAATAGAAGGC  
5A61;GCGCCTGTTATTCTAAGAACGCGATTCCAGAGCCTAATTTTTGTCGTC  
5A63-1;AACGTCGACGCTAACGAGCGTCTGGCGTTTT  
5A64;ACGACAATAAATCCCGACTTGCGGGAGATCCTGAATCTTACCAGCTACAGT  
5A65;AATCTCATACCCAGCTACAATTTTGTTTTGAAGCCTTAA

#### 4B Part

4B32;AATACTGCGGAATCGTAGGGGGTAATAGTAAACTCTCTTT  
4B31-1;TATCTGGTAAAGAAGTTTTTGCCAGCATAAATA  
4B30;TGCTGTAGATCCCCCTCAAATGCTGCGAGAGGCTTTTGCATGAACGGC  
4B28-1;GCTTGGTAGATAAAAACCAAAATATTAACAG  
4B26;CGGATGGCACGAGAATGACCATAATCGTTTACCAGACGACAGTTGGAT  
4B23-1;AGATTTGTAACACTATCATAACCCATCAAAAA  
4B20;TAATTGCTTTACCCTGACTATTATGAGGCATAGTAAGAGCCATTGTGA  
4B16-1;GTTGCGGCCGCCAAAAGGAATTACAGTCAGAA  
4B12;AACTCCAAGATTGCATCAAAAAGATAATGCAGATACATAATCATTCTG

4B08-1;TGGGAAGTGAATACCACATTCAACTTAAGAGG  
4B37;TTGTTCCAACAGGTAGAAAGATTCATCAGTTGAGATTTAGAGCGACAG  
4B41;CGACCTGCGGTCAATCATAAGGGAACGGAACAACATTATTTTCTTTAG  
4B45-1;AGCAAGGTTTAATAAAAACGAACTAACCGAACT  
4B49;TATCATCGTTGAAAGAGGACAGATGGAAGAAAAATCTACGCCATATCT  
4B53-1;ATTTAGCCACCAGTCAGGACGTTGGAACGGTG  
4B56;CCAAGCGCAGGCGCATAGGCTGGCAGAAGTGGCTCATTATACATAGAA  
4B59-1;CTGGTAGCACCTTATGCGATTTTATGACCTTC  
4B61;AAAACACTTAATCCTTGACAAGAAGTAAATCATTGTGAATTTTTAAGCG  
4B63-1;AACAGGCCTGGTTTAATTTCAACTCGGATATT  
4B64;ACCAACCTAAAAAATCAACGTAACAAATAAATTTGGGCTTGAGAACAACCAA  
4B65;CGTCCTGCACACCAGAACGAGTAGGCTGCTCATTTCAGTGA

#### 4A Part

4A32;CAGAAGGAAACCGAGGTTTTTAAGAAAAGTAAATGGGCAT  
4A31-1;CACGTATTTATCTTACCGAAGCCCAAACGCAA  
4A30;GAGCCAGCGAATACCCAAAAGAACATGAAATAGCAATAGCTTGCAAGC  
4A28-1;ATTGCGTAATAAGAGCAAGAAACATGGCATGA  
4A26;CACCGTCACCTTATTACGCAGTATTGAGTTAAGCCCAATACCCGACGA  
4A23-1;CGCTACCTGATAACCCACAAGAATGTTAGCAA  
4A20;TTGACGGAAATACATACATAAAGGGCGCTAATATCAGAGAGTAGGAAG  
4A16-1;ACCGCATGGTCAGAGGGTAATTGATGGCAACA  
4A12;CATTCAACAAACGCAAAGACACCAGAACACCCTGAACAAAGAAATGAA  
4A08-1;ACCATACTGACGGGAGAATTAACCTCGGAATAA  
4A37;AGTCGGCGAGAGAATAACATAAAAACAGGGAAGCGCATTACAGGCACA  
4A41;TTTCCTTAGCACTCATCGAGAACAATAGCAGCCTTTACAGTGTGAATC  
4A45-1;TCGGCAGCAACGTCAAAAATGAAAAGCAAGCC  
4A49;AGCATGTATTTTCATCGTAGGAATCAAACGATTTTTTTGTTTAAGAACCA  
4A53-1;AAAATAGTTCCCAATCCAAATAAGATTACCGC  
4A56;ACAAGAAAGCAAGCAAATCAGATAACAGCCATATTATTTACACGCAAA  
4A59-1;AAAACGCCGCCAGTTACAAAATAATAGAAGGC  
4A61;GCGCCTGTTATTCTAAGAACGCGATTCCAGAGCCTAATTTTCTAATCG  
4A63-1;AGAGTGTACGCTAACGAGCGTCTGGCGTTTT  
4A64;ACGACAATAAATCCCGACTTGCGGGAGATCCTGAATCTTACCAAAAAACGA  
4A65;ATGAGCCTACCCAGCTACAATTTTGTTTTGAAGCCTTAA

#### 3B Part

3B32;AATACTGCGGAATCGTAGGGGGTAATAGTAAAGTCGCATT  
3B31-1;GAATAGCAAAAAGAAGTTTTGCCAGCATAAATA  
3B30;TGCTGTAGATCCCCCTCAAATGCTGCGAGAGGCTTTTGCAAAGCCTCT  
3B28-1;GAGGCCTCGATAAAAACCAAATATTTAAACAG  
3B26;CGGATGGCACGAGAATGACCATAATCGTTTACCAGACGACCAGCAATC  
3B23-1;AATACCTTAACACTATCATAACCCATCAAAAA  
3B20;TAATTGCTTTACCCTGACTATTATGAGGCATAGTAAGAGCTCTTTTTG  
3B16-1;CGCGAATACGCCAAAAGGAATTACAGTCAGAA  
3B12;AACTCCAAGATTGCATCAAAAAGATAATGCAGATACATAATCCTTAAG

3B08-1;AGCTTGCGGAATACCACATTCAACTTAAGAGG  
3B37;GTTCTCTAACAGGTAGAAAGATTCATCAGTTGAGATTTAGGCAAAACT  
3B41;CGACCTGCGGTCAATCATAAGGGAACGGAACAACATTATTAACCAT  
3B45-1;GGCGGTGGTTAATAAAACGAACTAACCGAACT  
3B49;TATCATCGTTGAAAGAGGACAGATGGAAGAAAAATCTACGTCTATAGT  
3B53-1;TGGGGGAGACCAGTCAGGACGTTGGAACGGTG  
3B56;CCAAGCGCAGGCGCATAGGCTGGCAGAAGTGGCTCATTATCACATTGT  
3B59-1;ATCCATTAACCTTATGCGATTTTATGACCTTC  
3B61;AAAACACTTAATCCTTGACAAGAAGTAAATCATTGTGAATTACTTCTCA  
3B63-1;CATCACGATGGTTTAATTTCAACTCGGATATT  
3B64;ACCAACCTAAAAAATCAACGTAACAAATAAATTGGGCTTGAGAACGTCAGA  
3B65;TCAACATAACACCAGAACGAGTAGGCTGCTCATTAGTGA

### 3A Part

3A32;CAGAAGGAAACCGAGGTTTTTAAGAAAAGTAAGAAGTCAA  
3A31-1;AGACAGAATATCTTACCGAAGCCCAAACGCAA  
3A30;GAGCCAGCGAATACCCAAAAGAACATGAAATAGCAATAGCTCTCTTCC  
3A28-1;TATCCATCATAAGAGCAAGAAACATGGCATGA  
3A26;CACCGTCACCTTATTACGCAGTATTGAGTTAAGCCCAATATGCTTATG  
3A23-1;GATTGAGAGATAACCCACAAGAATGTTAGCAA  
3A20;TTGACGGAAATACATACATAAAGGGCGCTAATATCAGAGAAAGAGTAG  
3A16-1;AATAGCAGGTCAGAGGGTAATTGATGGCAACA  
3A12;CATTCAACAAACGCAAAGACACCAGAACACCCTGAACAAAGTTTAAGA  
3A08-1;AGTCAAAAGACGGGAGAATTAACCTCGGAATAA  
3A37;TAATAAGAAGAGAATAACATAAAAACAGGGAAGCGCATTATAATCAGC  
3A41;TTTCTTAGCACTCATCGAGAACAATAGCAGCCTTTACAGACGAACCA  
3A45-1;ATTTGGAGAACGTCAAAAATGAAAAGCAAGCC  
3A49;AGCATGTATTTTCATCGTAGGAATCAAACGATTTTTTTGTTTGCATGAAA  
3A53-1;GTGTCAATTCCCAATCCAATAAGATTACCGC  
3A56;ACAAGAAAGCAAGCAAATCAGATAACAGCCATATTATTTACCTGACGG  
3A59-1;TTAGAGCCGCCAGTTACAAAATAATAGAAGGC  
3A61;GCGCCTGTTATTCTAAGAACGCGATTCCAGAGCCTAATTTAATACCAT  
3A63-1;CCAGAAATACGCTAACGAGCGTCTGGCGTTTT  
3A64;ACGACAATAAATCCCGACTTGCGGGAGATCCTGAATCTTACCATGTTCCAA  
3A65;TATCAATAACCCAGCTACAATTTTGTTTTGAAGCCTTAA

### 2B Part

2B32;AATACTGCGGAATCGTAGGGGGTAATAGTAAACCATGAAA  
2B31-1;GAAGCAGCAAAGAAGTTTTGCCAGCATAAATA  
2B30;TGCTGTAGATCCCCCTCAAATGCTGCGAGAGGCTTTTGCAATCAGTGA  
2B28-1;CTTTGCAGGATAAAAACCAAATATTAACAG  
2B26;CGGATGGCACGAGAATGACCATAATCGTTTACCAGACGACTAGCGCCA  
2B23-1;ACCGCTGAAACACTATCATAACCCATCAAAAA  
2B20;TAATTGCTTTACCCTGACTATTATGAGGCATAGTAAGAGCTTCTGCGT  
2B16-1;TCAACCTCCGCCAAAAGGAATTACAGTCAGAA  
2B12;AACTCCAAGATTGCATCAAAAAGATAATGCAGATACATAAAGCACTAA

2B08-1;TTTGATTTGAATACCACATTCAACTTAAGAGG  
2B37;CCGTTTGAACAGGTAGAAAGATTCATCAGTTGAGATTTAGGGTCATTG  
2B41;CGACCTGCGGTCAATCATAAGGGAACGGAACAACATTATTGCTTGAGT  
2B45-1;ATCTCGGATTAATAAAACGAACTAACCGAACT  
2B49;TATCATCGTTGAAAGAGGACAGATGGAAGAAAAATCTACGAACCTGCT  
2B53-1;GGTGTTTTACCAGTCAGGACGTTGGAACGGTG  
2B56;CCAAGCGCAGGCGCATAGGCTGGCAGAACTGGCTCATTATCCATAATA  
2B59-1;TAGACTCCACCTTATGCGATTTTATGACCTTC  
2B61;AAAACACTTAATCCTTGACAAGAACTTAATCATTGTGAATTTTCTGTTG  
2B63-1;TTTTGTGCTGGTTTAATTTCAACTCGGATATT  
2B64;ACCAACCTAAAAAATCAACGTAACAAATAAATTGGGCTTGAGAATATACCT  
2B65;GCGTGAAGACACCAGAACGAGTAGGCTGCTCATTGAGTGA

#### 2A Part

2A32;CAGAAGGAAACCGAGGTTTTTAAGAAAAGTAACAGCAATC  
2A31-1;TTTGCATCTATCTTACCGAAGCCCAAACGCAA  
2A30;GAGCCAGCGAATACCCAAAAGAACATGAAATAGCAATAGCTCGGCAAT  
2A28-1;AGTTGCATATAAGAGCAAGAAACATGGCATGA  
2A26;CACCGTCACCTTATTACGCAGTATTGAGTTAAGCCCAATATTTAGTAA  
2A23-1;AAATCCGGGATAACCCACAAGAATGTTAGCAA  
2A20;TTGACGGAAATACATACATAAAGGGCGCTAATATCAGAGACGTCAACC  
2A16-1;CATCAGCAGTCAGAGGGTAATTGATGGCAACA  
2A12;CATTCAACAAACGCAAAGACACCAGAACACCCTGAACAAACCAGCACG  
2A08-1;TCAGGAAAGACGGGAGAATTAACCTCGGAATAA  
2A37;ATCCTTTCAGAGAATAACATAAAAACAGGGAAGCGCATTATGCAGCAG  
2A41;TTTCTTAGCACTCATCGAGAACAATAGCAGCCTTTACAGCTTTATCA  
2A45-1;CAAGTCCAAACGTCAAAAATGAAAAGCAAGCC  
2A49;AGCATGTATTTTCATCGTAGGAATCAAACGATTTTTTTGTTTACCAAATC  
2A53-1;ACGGCAGATCCCAATCCAAATAAGATTACCGC  
2A56;ACAAGAAAGCAAGCAAATCAGATAACAGCCATATTATTTAAGTGCCAG  
2A59-1;AAGAAGTCGCCAGTTACAAAATAATAGAAGGC  
2A61;GCGCCTGTTATTCTAAGAACGCGATTCCAGAGCCTAATTTCTTTACCA  
2A63-1;CAGAAACAACGCTAACGAGCGTCTGGCGTTTT  
2A64;ACGACAATAAATCCCGACTTGCGGGAGATCCTGAATCTTACCAAAACTAGG  
2A65;TTAGGAACACCAGCTACAATTTTGTTTTGAAGCCTTAA

#### 1B Part

1B32;AATACTGCGGAATCGTAGGGGGTAATAGTAAAATTAGAGC  
1B31-1;AATACCAGAAAGAAGTTTTTGCCAGCATAAATA  
1B30;TGCTGTAGATCCCCCTCAAATGCTGCGAGAGGCTTTTGCACATCACCC  
1B28-1;TATCGGTAGATAAAAACCAAAATATTTAAACAG  
1B26;CGGATGGCACGAGAATGACCATAATCGTTTACCAGACGACGCAAGCAC  
1B23-1;CCGGAGGCAACACTATCATAACCCATCAAAAA  
1B20;TAATTGCTTTACCCTGACTATTATGAGGCATAGTAAGAGCGGCTTTTT  
1B16-1;TTTAGACACGCCAAAAGGAATTACAGTCAGAA  
1B12;AACTCCAAGATTGCATCAAAAAGATAATGCAGATACATAATGGCGCCA

1B08-1;CAATACCGGAATACCACATTCAACTTAAGAGG  
1B37;CACCTCACACAGGTAGAAAGATTCATCAGTTGAGATTTAGCCAGCAAT  
1B41;CGACCTGCGGTCAATCATAAGGGAACGGAACAACATTATTTTAAGTGG  
1B45-1;TCTTTAATTTAATAAAAACGAACTAACCGAACT  
1B49;TATCATCGTTGAAAGAGGACAGATGGAAGAAAAATCTACGAACCTGAT  
1B53-1;GCGGCATTACCAGTCAGGACGTTGGAACGGTG  
1B56;CCAAGCGCAGGCGCATAGGCTGGCAGAAGCTGGCTCATTATTAGTAGCG  
1B59-1;CCATGAAAACCTTATGCGATTTTATGACCTTC  
1B61;AAAACACTTAATCCTTGACAAGAAGCTTAATCATTGTGAATTCCAACATA  
1B63-1;GTACGGGGTGGTTTAATTTCAACTCGGATATT  
1B64;ACCAACCTAAAAAATCAACGTAACAAATAAATTGGGCTTGAGAAAGGACGT  
1B65;CTTGACGGACACCAGAACGAGTAGGCTGCTCATTAGTGA

#### 1A Part

1A32;CAGAAGGAAACCGAGGTTTTTAAGAAAAGTAACATGGCGA  
1A31-1;CATCATAGTATCTTACCGAAGCCCAAACGCAA  
1A30;GAGCCAGCGAATACCCAAAAGAACATGAAATAGCAATAGCGCAGTCGG  
1A28-1;GAAGAAGAATAAGAGCAAGAAACATGGCATGA  
1A26;CACCGTCACCTTATTACGCAGTATTGAGTTAAGCCCAATACTCAAAGC  
1A23-1;AAATTTAGGATAACCCACAAGAATGTTAGCAA  
1A20;TTGACGGAAATACATACATAAAGGGCGCTAATATCAGAGAGGTCGGCA  
1A16-1;CACCAACAGTCAGAGGGTAATTGATGGCAACA  
1A12;CATTCAACAAACGCAAAGACACCAGAACACCCTGAACAAAGAAACAAC  
1A08-1;ACAGATGTGACGGGAGAATTAACCTCGGAATAA  
1A37;ACCACCATAGAGAATAACATAAAAACAGGGAAGCGCATTAAATCCATCT  
1A41;TTTCCTTAGCACTCATCGAGAACAATAGCAGCCTTTACAGTACCAGCA  
1A45-1;CAAAATATAACGTCAAAAATGAAAAGCAAGCC  
1A49;AGCATGTATTTTCATCGTAGGAATCAAACGATTTTTTTGTTTAACGTTGA  
1A53-1;GTCTGTAATCCCAATCCAAATAAGATTACCGC  
1A56;ACAAGAAAGCAAGCAAATCAGATAACAGCCATATTATTTAAACAGGTG  
1A59-1;AACAGAAGGCCAGTTACAAAATAATAGAAGGC  
1A61;GCGCCTGTTATTCTAAGAACGCGATTCCAGAGCCTAATTTTGAGAACC  
1A63-1;AGTTTGAAACGCTAACGAGCGTCTGGCGTTTT  
1A64;ACGACAATAAATCCCGACTTGCGGGAGATCCTGAATCTTACCATTATGGCG  
1A65;AACATGATACCCAGCTACAATTTTGTTTTGAAGCCTTAAA

#### Bridges

611;ATATAACCAAGTCTGA  
612;AGAAATAAAGTAGTGT  
621;AGTGGCATAGAAAAAA  
622;AGCTTATCTAACACCA  
631;TCCACTGTGCTGGAGT  
632;CCGAAGAATCACCATA  
641;ACATAAAAACCTTTAGGT  
642;CGATGTAGAGTAAAAA  
651;AATAGCAACAACTAT

652;TTAACCGTGGCCACGA  
661;GGAGAGCGTGAAGAAA  
662;GAATGCAACCAACGGC

671;TCGCCAGCCGGCGTTG  
672;CTGATTAGGATAACCG  
681;AATAAGACAATATCAG  
682;TCAAAAGCGACCAATC  
691;CAAGATGGCAGGCAAA  
692;GAACCAAAGAAAGGTC  
6101;GCGCCAGTTCGGAACC  
6102;GAGGGTAGTTGAATAT  
6111;TCAAGTAAAGGATAAA  
6112;CCATTCAAGGGGCCGA

#### 5 Triangle Origami(65)

511;CATACCAAGAACGTGC  
512;TCCTTGACAGACGAGC  
521;TTAGTACCAAATGTGA  
522;CATGAACATCGCAACG  
531;GCGAGCGCAAATGTCA  
532;CTCTTTTACAGAACGT  
541;TTACATCAATCGGACT  
542;TGAACAGCCTCCTTCC  
551;GCACGTTTCATGATTT  
552;ACTTGACTTCTTCTGC

561;GTGTTTCCTGGAAACG  
562;AAGCGGTCTGCGCGTA  
571;GAACAATTCCTGAATG  
572;GGCAGAAGCAGCGGCT  
581;CGCCATTAATCATCTT  
582;AAATCGAAATAATGTT  
591;CCTTCCATATCCAAAC  
592;CAGTAGCAGATGAGAC  
5101;GACGGGATCGCAGCGA  
5102;AGCCTCAAGAACATAA  
5111;CAATAAACAAAGTCCA  
5112;TATCCCACTCAACAGG

#### 4 Triangle Origami(54)

411;CGCGTCAGTGAAAAAG  
412;CCAGAACGTTTTTGAC  
421;GGCGAAAGTTAGCATC  
422;GCTCACCTGTGCGAAA  
431;CTGCGCAACCATATAA

432;ACCAACAGGGATAGGT  
441;CCGCCAGCGTTAACGT  
442;GACTTTTTAGTCCACT  
451;ACAAGCAGCCTTTAGC  
452;CTCCTAGATAGTAATT

461;AATTTTTCTTAGTGAG  
462;CTTGGTTTGACTCATC  
471;GTAACTTCAGCTTCT  
472;ATTCTGAACTGCGTCA  
481;CTGCAGGTATCCCGAA  
482;GCATTTTCTGGATACG  
491;AAGCGCGCCCGTGGAC  
492;TAAGCACTATAAATTT  
4101;ACAGGTTGGTAACCCA  
4102;GTCGCGTCCGCCGCCA  
4111;AACTTTTCTGCTTCAA  
4112;TTGCGTCCCAGCCTC

### 3 Triangle Origami(43)

311;ACTGTAACTATGGCCG  
312;AGCAGCCTCATAAGGC  
321;TATTTAACTACAAACT  
322;GTAACAGATGGCGGCG  
331;CCAAAATTGCCAATTC  
332;AGCATTGTAGGGTCAA  
341;TGTCCGCATATCAAGT  
342;GTTATTAATAAAGTGC  
351;GACGGCCACCCTTCGG  
352;TTTTCGTCTTAGCTGT

361;CAAAAATAGTCTTCTC  
362;GCGTAACCCTGATAGC  
371;ATTAGCCTCAGCAGCC  
372;AGGGCGTTTGCGACCC  
381;TACGACCAATACTCAT  
382;GGGTAATTATATCACG  
391;GCATTGGGTCATCCTT  
392;TTGAACACATTATCAT  
3101;GTCGTCAGTCATAGTG  
3102;ACGCGATTCCAACGTG  
3111;TAAACCAACAAACGCT  
3112;GCATTCATCCATCAGC

### 2 Triangle Oriami(32)

211;CGCCCTGCGTATTCTG

212;GGTCTTTCATACGAAA  
221;AAGAGCTTGCATCTCA  
222;ATAAGCAAGATGCGGT  
231;GAAGCCAAGCGAGCAG  
232;GACGCAACGCATTGGG  
241;AAATGCCAGAAAGATT  
242;GTTGCTTGCAAGCCTC  
251;GCCTCGATGGCGCATA  
252;AAGCATTTACGCTCAA

261;GTGACATTCTGACCAG  
262;GTAAAATACAGAAGGG  
271;TAAAAAAGGTCATTTC  
272;CCTTGCGACCTCCAAG  
281;ACATACAAGA ACTAAG  
282;TTGCTGATTTGGGAGG  
291;TTATTTCCAGAGCCAT  
292;ATATGAGATAGACAAA  
2101;CAGCTTTAGAAATATC  
2102;CGACATTACCGTCTTT  
2111;GTATCGGCCCCACACCA  
2112;AATATCAAAACAGCTT

#### 1 Triangle Origami(21)

111;TCTTTTTGACACAGTC  
112;CAATAGTCAGTCTCAT  
121;CTCTTTCTTGCCCGGC  
122;AACGTTATGATTGTCC  
131;GCTCTTTTAGACCAA  
132;GTAAAGTTTGATTCTC  
141;ATACCAGCACCAATCC  
142;TCAGCGAAAGAGGAAG  
151;CTCCCAAGAAATAATC  
152;CTGGAGACCATTAAGC

161;CAAGATAAACATAAAT  
162;AGCACCAATCACGAGT  
171;GCGGCAGAAGCAGAAG  
172;CCAGCAAGCTTGCCAC  
181;AAGCAACTCCAAACAA  
182;GACCGCCTTATCAGAA  
191;CCTGCAACGAATGCCA  
192;ATCACCTTGTACCTTC  
1101;GCTTTAGCAGTATTGT  
1102;ATGCCTACCATAGCAC  
1111;GGCGGCCTGCAGATTT



1112;CTTGAATGCATCAGGG

**Table S3. Triangle origami modified staples and bridges that hybridize with  $\Phi$ X 174 scaffolds for design 2**

**Modified helpers for each triangle origami**

6I1;CGAAGGAGTCGCCAGCCGGCGTTGACAGATGT  
6I21;CACCAACAGAAACAACCTGATTAGGATAACCG  
6T22;GAGTAGTTGAAATGGTAATAAGACAATATCAG  
6I31;AAATTTAGGGTTCGGCATCAAAAGCGACCAATC  
6I32;TGACCAGCAAGGAAGCCAAGATGGCAGGCAAA  
6I41;GAAGAAGACTCAAAGCGAACCAAAAGAAAGGTC  
6I42;ATGCGGCATACGCTCGGCCGCCAGTTCGGAACC  
6I51;CATCATAGGCAGTCGGGAGGGTAGTTGAATAT  
6I52;TAGACATAAATTTATCCTCAAGTAAAGGATAAA  
6I6;CATGGCGACCATTCAAGGGGCCGAAGCCCCTG

5I1;GTTTCAGTAACTTGACTTCTTCTGCGTCAGTAA  
5I21;GCACGTAATTTTTGACGCACGTTTCATGATTT  
5T22;CTTACCTATTAGTGGTTGAACAGCCTCCTTCC  
5I31;TTTTTACCTTTAGACATTACATCAATCGGACT  
5I32;CAGATAGTAATCCACGCTCTTTTACAGAACGT  
5I41;GCTGCGGACGACCAGGGCGAGCGCAAATGTCA  
5I42;ACAAGAGAATCTCTACCATGAACATCGCAACG  
5I51;GCCTTTACGCTTGCCTTTAGTACCAAATGTGA  
5I52;CTCATATCTAAACCAGTCCTTGACAGACGAGC  
5I6;ACCACCTACATACCAAGAACGTGCCAAGCATA

4I1;TTCTTTAGCTCCTAGATAGTAATTCCTGCTTT  
4I21;TCGATTTAATTCGTAACAAGCAGCCTTTAGC  
4T22;AGCAAGGTCCATATCTGACTTTTTAGTCCACT  
4I31;CGAATTTTCTCATTTTTCCGCCAGCGTTAACGT  
4I32;ATTTAGCCACATAGAAACCAACAGGGATAGGT  
4I41;GTAAGAGCTTCTCGAGCTGCGCAACCATATAA  
4I42;CTGGTAGCTTTAAGCGGCTCACCTGTGCGAAA  
4I51;AGAATCGTTAGTTGATGGCGAAAGTTAGCATC  
4I52;AACAGGCCACAACCAACCAGAACGTTTTTGAC  
4I6;TCATCCAACGCGTCAGTGAAAAAGCGTCCTGC

3I1;AAAACCATTTTTTCGTCTTAGCTGTACCATACT  
3I21;GGCGGTGGTCTATAGTGTTATTAATAAAGTGC  
3I22;ACCGCATGGAAATGAAGACGGCCACCCTTCGG  
3I31;TGGGGGAGCACATTGTAGCATTGTAGGGTCAA  
3I32;CGCTACCTGTAGGAAGTGTCCGCATATCAAGT  
3I41;ATCCATTAACCTTCTCAGTAACAGATGGCGGCG  
3I42;ATTGCGTACCCGACGACCAAAAATTGCCAATTC  
3I51;CATCACGAACGTCAGAAGCAGCCTCATAAGGC

3T52;CACGTATTTTGTCAAGCTATTTAACTACAAACT  
3I6;ATGGGCATACTGTAAGCTATGGCCGTCAACATA

2I1;GCTTGAGTAAGCATTTACGCTCAAAGTCAAAA  
2I21;AATAGCAGGTTTAAGAGCCTCGATGGCGCATA  
2T22;ATCTCGGAAACCTGCTGTTGCTTGCAAGCCTC  
2I31;GATTGAGAAAGAGTAGAAATGCCAGAAAGATT  
2I32;GGTGTTTTCCATAATAGACGCAACGCATTGGG  
2I41;TATCCATCTGCTTATGGAAGCCAAGCGAGCAG  
2I42;TAGACTCCTTCTGTTGATAAGCAAGATGCGGT  
2I51;AGACAGAATCTCTTCCAAGAGCTTGCATCTCA  
2I52;TTTTGTGCATATACCTGGTCTTTCATACGAAA  
2I6;GAACTCAACGCCCTGCGTATTCTGGCGTGAAG

1I1;TTAAGTGGCTGGAGACCATTAAGCTCAGGAAA  
1I21;CATCAGCACCAGCACGCTCCCAAGAAATAATC  
1T22;TCTTTAATAACCTGATTCAGCGAAAGAGGAAG  
1I31;AAATCCGGCGTCAACCATAACCAGCACCAATCC  
1I32;GCGGCATTTAGTAGCGGTAAAGTTTGATTCTC  
1I41;AGTTGCATTTTAGTAAGCTCTTTTAGACCAA  
1I42;CCATGAAACCAACATAAACGTTATGATTGTCC  
1I51;TTTGCATCTCGGCAATCTCTTTCTTGCCCGGC  
1I52;GTACGGGGAAGGACGTCAATAGTCAGTCTCAT  
1I6;CAGCAATCTCTTTTGTACACAGTCCTTGACGG

**Table S4. Triangle origami modified staples and bridges that hybridize with  $\Phi$ X 174 scaffolds for design 3**

**Modified helpers for each triangle origami**

111;CATGGTCAATATAACCAAGTCTGA  
112;AGAAATAAAGTAGTGTTAACAGTC  
121;AGTGGCATAGAAAAAAGTTTGAA  
122;TGAGAACCAGCTTATCTAACACCA  
131;GAACTTAATCCACTGTGCTGGAGT  
132;CCGAAGAATCACCATAAACGTGAC  
141;ACATAAACTTTAGGTGTCTGTAA  
142;AACGTTGACGATGTAGAGTAAAAA  
151;GTAGAGTCAATAGCAACAACTAT  
152;TTAACCGTGGCCACGACGCAATGG  
161;GGAGAGCGTGAAGAAAACCACCAT  
162;ATCCATCTGAATGCAACCAACGGC  
171;CGAAGGAGTCGCCAGCCGGCGTTG  
172;CTGATTAGGATAACCGGAGTAGTT  
181;AATAAGACAATATCAGCACCAACA  
182;GGTCGGCATCAAAGCGACCAATC  
191;AAGGAAGCCAAGATGGCAGGCAA  
192;GAACCAAAGAAAGGTCATGCGGCA

1101;GCGCCAGTTCGGAACCGAAGAAGA  
1102;GCAGTCGGGAGGGTAGTTGAATAT  
1111;ATTTATCCTCAAGTAAAGGATAAA  
1112;CCATTCAAGGGGCCGAAGCCCCTG  
211;AGCGAGGGTATCCCCTCAACAGG  
212;CAATAAACAAAGTCCAGCGTACCA  
221;AGCCTCAAGAACATAATAAGCAAT  
222;TGAATGTTGACGGGATCGCAGCGA  
231;AGAGCGGTCAGTAGCAGATGAGAC  
232;CCTTCCATATCCAACTTTGTTAC  
241;AAATCGAAATAATGTTTTCCGTAA  
242;ACGCTCGACGCCATTAATCATCTT  
251;TCCAAAACGGCAGAAGCAGCGGCT  
252;GAACAATTCCTGAATGAGCTTAAT  
261;AAGCGGTCTGCGCGTACACGCAAG  
262;GAACGTCAGTGTTTCCTGGAAACG  
271;GTTTCAGTAACTTGACTTCTTCTGC  
272;GCACGTTTCATGATTTCTTACCTA  
281;TGAACAGCCTCCTTCCGCACGTAA  
282;TTTAGACATTACATCAATCGGACT  
291;AATCCACGCTCTTTTACAGAACGT  
292;GCGAGCGCAAATGTCAACAAGAGA  
2101;CATGAACATCGCAACGGCTGCGGA  
2102;GCTTGCCTTTAGTACCAAATGTGA  
2111;TAAACCAGTCCTTGACAGACGAGC  
2112;CATACCAAGAACGTGCCAAGCATA  
311;CTCTCTTTTTGCGTTCCCAGCCTC  
312;AACTTTTCTGCTTCAATATCTGGT  
321;GTCGCGTCCGCCGCCAAAACGTCG  
322;TTGTCGTACAGGTTGGTAACCCA  
331;AGTTGGATTAAGCACTATAAATTT  
332;AAGCGCGCCCGTGGACAGATTTGT  
341;GCATTTTCTGGATACGCCAATCAT  
342;ATAAACTCTGCAGGTATCCCGAA  
351;TCATTCTGATTCTGAACTGCGTCA  
352;GTTAACTTCAGCTTCTTGGGAAGT  
361;CTTGGTTTGA CTCATCAGAAATAT  
362;ATCAAGATAATTTTTCTTAGTGAG  
371;TTCTTTAGCTCCTAGATAGTAATT  
372;ACAAGCAGCCTTTAGCAGCAAGGT  
381;GACTTTTTAGTCCACTTCGATTTA  
382;CTCATTTTCCGCCAGCGTTAACGT  
391;ACATAGAAACCAACAGGGATAGGT  
392;CTGCGCAACCATATAACTGGTAGC  
3101;GCTCACCTGTCGCAAAGTAAGAGC  
3102;TAGTTGATGGCGAAAGTTAGCATC

3111;ACAACCAACCAGAACGTTTTTTGAC  
3112;CGCGTCAGTGAAAAAGCGTCCTGC  
411;GTCGCATTGCATTCATCCATCAGC  
412;TAAACCAACAAACGCTGAATAGCA  
421;ACGCGATTCCAACGTGAGAGTGTC  
422;TCTAATCGGTTCGTCAGTCATAGTG  
431;CAGCAATCTTGAACACATTATCAT  
432;GCATTGGGTCATCCTTAATACCTT  
441;GGGTAATTATATCACGAAAATAGT  
442;AAGAACCATACGACCAATACTCAT  
451;TCCTTAAGAGGGCGTTTGCGACCC  
452;ATTAGCCTCAGCAGCCAGCTTGCG  
461;GCGTAACCCTGATAGCAGTCGGCG  
462;CAGGCACACAAAAATAGTCTTCTC  
471;AAAACCATTTTTTCGTCTTAGCTGT  
472;GACGGCCACCCTTCGGGGCGGTGG  
481;GTTATTAATAAAGTGCACCGCATG  
482;GTAGGAAGTGTCCGCATATCAAGT  
491;CACATTGTAGCATTGTAGGGTCAA  
492;CCAAAATTGCCAATTCATCCATTA  
4101;GTAACAGATGGCGGCGATTGCGTA  
4102;TTGCAAGCTATTTAACTACAAACT  
4111;ACGTCAGAAGCAGCCTCATAAGGC  
4112;ACTGTA ACTATGGCCGTCAACATA

511;CCATGAAAAATATCAAAACAGCTT  
512;GTATCGGCCCCACACCAGAAGCAGC  
521;CGACATTACCGTCTTTCCAGAAAT  
522;AATACCATCAGCTTTAGAAATATC  
531;TAGCGCCAATATGAGATAGACAAA  
532;TTATTTCCAGAGCCATACCGCTGA  
541;TTGCTGATTTGGGAGGGTGTCAAT  
542;GCATGAAAACATACAAGA ACTAAG  
551;AGCACTAACCTTGCGACCTCCAAG  
552;TAAAAAAGGTCATTTCTTTGATTT  
561;GTAAAATACAGAAGGGTAATAAGA  
562;TAATCAGCGTGACATTCTGACCAG  
571;GCTTGAGTAAGCATTTACGCTCAA  
572;GCCTCGATGGCGCATAATCTCGGA  
581;GTTGCTTGCAAGCCTCAATAGCAG  
582;AAGAGTAGAAATGCCAGAAAGATT  
591;CCATAATAGACGCAACGCATTGGG  
592;GAAGCCAAGCGAGCAGTAGACTCC  
5101;ATAAGCAAGATGCGGTTATCCATC  
5102;TCTCTTCCAAGAGCTTGCATCTCA

5111;ATATACCTGGTCTTTCATACGAAA  
 5112;CGCCCTGCGTATTCTGGCGTGAAG  
 611;ATTAGAGCCTTGAATGCATCAGGG  
 612;GGCGGCCTGCAGATTTAATACCAG  
 621;ATGCCTACCATAGCACCAGAAACA  
 622;CTTTACCAGCTTTAGCAGTATTGT  
 631;GCAAGCACATCACCTTGTACCTTC  
 632;CCTGCAACGAATGCCACCGGAGGC  
 641;GACCGCCTTATCAGAAACGGCAGA  
 642;ACCAAATCAAGCAACTCCAAACAA  
 651;TGGCGCCACCAGCAAGCTTGCCAC  
 652;GCGGCAGAAGCAGAAGCAATACCG  
 661;AGCACCAATCACGAGTATCCTTTC  
 662;TGCAGCAGCAAGATAAACATAAAT  
 671;TTAAGTGGCTGGAGACCATTAAGC  
 672;CTCCCAAGAAATAATCTCTTTAAT  
 681;TCAGCGAAAGAGGAAGCATCAGCA  
 682;CGTCAACCATAACCAGCACCATCC  
 691;TAGTAGCGGTAAAGTTTGATTCTC  
 692;GCTCTTTTAGACCAAACCATGAAA  
 6101;AACGTTATGATTGTCCAGTTGCAT  
 6102;TCGGCAATCTCTTTCTTGCCCGGC  
 6111;AAGGACGTCAATAGTCAGTCTCAT  
 6112;TCTTTTTGACACAGTCCTTGACGG

**Table S5. Unmodified square DNA origami staples**

1 TTCAGGGATAGCAAG  
 2 GAACCGCCACCCTCAGCCCTTATT  
 3 TAGTACCGCCACCCTCAAATCAC  
 4 CGGAATAGGTGTATCACGCCTCCC  
 5 GTGCCGTCGAGAGGGTCCACCCTC  
 6 TAGCGGGGTTTTGCTCACCAGAAC  
 7 AGGCTGAGACTCCTCATGACAGGAGGTTGAGGCAGGTC  
 8 CATGAAAGTATTAAG  
 9 ATCGGCATTTTCGGTCATAGCCAGCCACCACCCTCATT  
 10 AGTTTTGCCCATCTTTTCATAATCAGAACCGCCACCCTCA  
 11 AAACCAAAGAGCCACCACCGGAACCCGTACTCAGGAGGTT  
 12 TATCATAAGCCACCCTCAGAACCGTGATATAAGTATAGCC  
 13 AAAGGAATCACCTCAGAGCCGCCAGTACCAGGCGGATAA  
 14 CCACATTTCGAGCCGCCGCCAGCATAGAGAAGGATTAGGAT  
 15 AACCTATTATTCTGA  
 16 TATAAACAGTTAATGCCAAATAAA  
 17 AACGGGGTCAGTGCCTGCGCAGTC  
 18 GATGATACAGGAGTGTGTCATACAT  
 19 AAACGGGTAAAATACGAAAGAGGC

20 ACTAAAGACTTTTTCACTTTGACC  
21 CGAGGGTAGCAACGGCACAAAGTACAACGGAGATTTGT  
22 AAGACAGCATCGGAA  
23 GATTGGCCTTGATATTCACAAACCCCTGCCTATTTCCG  
24 AAAACGAAAAAGCCAGAATGGAAATGAGTAACAGTGCCCCG  
25 TCAGGACGTACCGTTCCAGTAAGCACTGGTAATAAGTTTT  
26 ATGCGATTGCACCAACCTAAAACGTAATGCCACTACGAAG  
27 TAATTTCAACACTAAAACACTCATTGAGGAAGTTTCCATT  
28 AGAACGAGTTATACCAAGCGCGAATACAGAGGCTTTGAGG  
29 GTCACCCTCAGCAGC  
30 TGCAGGGAGTTAAAGGATCCGCGA  
31 ACGCATAACCGATATAACGAGGCG  
32 AGTTGCGCCGACAATGGAACCTGAC  
33 GAGGTGAATTTCTTAAAGTTTATT  
34 CTTTAATTGTATCGGTTATGGTTT  
35 AAAATCTCCAAAAAAAACATTCAACCGATTGAGGGAGG  
36 AATTTTTTCACGTTG  
37 TCGCCTGATAAATTGTGTGCGAACCGCTTTTGCGGGATC  
38 TACCCAAAATGTTACTTAGCCGGATTCCGGTCGCTGAGGCT  
39 AAGAGTAACAATCATAAGGGAACCACAACAACCATCGCCC  
40 AGACCAGGAAAGAGGACAGATGAAACAGCTTGATACCGAT  
41 GAAACGCAATCAATAGAAAATTCATTATCAGCTTGCTTTC  
42 AAATACATCAAAGACAAAAGGGCGAGGCTCCAAAAGGAGC  
43 AAGGAATTGCGAATA  
44 TTCAGCGGAGTGAGAACATTAAAG  
45 GTATGGGATTTTGCTAGAGCCATT  
46 CGTCTTCCAGACGTTCCAGTAGC  
47 CTCATAGTTAGCGTAAAACGTCAC  
48 ACTACAACGCCTGTAGCGTAATCA  
49 TACCGTAACACTGAGTTTAGCGTCAGACTGTAGCGCGT  
50 CAATAGGAACCCATG  
51 GTAAATATTGACGGAAATTATTTAGAAAGGAACAACATA  
52 GGAATACCTCACCGTCACCGACTTAACAACCTTCAACAGT  
53 CCAGAAGGAGAGCCAGCAAAATCAAGTAAATGAATTTTCT  
54 AATCAAAAACATTAGCAAGGCCGGACGATCTAAAGTTTTGT  
55 TTAAACACCATCGATAGCAGCACCATTCCACAGACAGCC  
56 TCATAAATAGAATCAAGTTTGCCTTTCGTCACCAGTACAA  
57 AGCGTTTGCAGAGGGGGTAATAGTATTCGAGC  
58 CGGAACCAATAGCGAGAGGCTTTTAAACTCCAACAGGTCAATAAGAGG  
59 TCAGAGCCCCCTCGTTTACCAGACTAAACCAAGTACCGCATTCCAAGA  
60 AGAGCCACTACGAGGCATAGTAAGAAGCCGTTTTTATTTTACCAATCA  
61 CACCACCAAATAATGCAGATACAACCGCGCCCAATAGCAAATATCCC  
62 TCCTCATTCTAACGGAACAACATTTCTAAGAA

63 TCTGAATTTTGGGAAGAAAAATCTCGACTTGCGGGAGGTTTCATGTTCA  
64 GGCTTTTTTAAGAAGTGGCTCATAGATTAGTTGCTATTTAGTAATTC  
65 AAAAGAATACTTTAATCATTGTGATTTATCCTGAATCTTATAGAACCC  
66 CCCAGCGATAGTAAATTGGGCTTGTCTTTCCAGAGCCTAAAGCCTTTA  
67 CCTGCTCCTCAACGTAACAAAGCTTTATCCCA  
68 CAGACGGTTCTTGACAAGAACCGGTTTAAACGTCAAAAATGCAGAGCAT  
69 CAACTTTGCGCATAGGCTGGCTGACAGAGAGAATAACATACAAAGAAT  
70 TTGTCACAAAGACACCACGGAATATTAGACGGGAGAATTAGCATTAAAC  
71 ACCAGCGCACATAAAGGTGGCAACAAAGTCAGAGGGTAATAAAAGGTG  
72 GTGAATTACAAAAGAAGTGGCATGAATTGAGT  
73 TGGGAATTAACCGAGGAAACGCAACAATGAAATAGCAATTTAGATAC  
74 ACCATTACTAAGCAGATAGCCGAACCTTTTTAAGAAAAGAATTCTGC  
75 CAATGAAAGTTCAGAAAACGAGAAGACTATTATAGTCAGAGGAAGTTT  
76 GTAGCGACATTCATTGAATCCCCCTCAAAAAGATTAAGAGTGTTTTAA  
77 TTCATCAGTTGAGATTAAGGCT  
78 AGGCTTGCCCTGACGATAAACA  
79 ACGCAGTATGTTAGCAAGAGAT  
80 ATAGCGTCCAATACTGCAAATA  
81 GTTTTAAAAATGTTTAGACTGG  
82 TTCAAAGCTTAATTGCTGAATAT  
83 CGGTATATTACAGGTAGAAAGA  
84 CGCGAGGCTCAACAATAGATAAG  
85 TATTATGCTCATTGAGTGAATA  
86 ATCCAAATACATTATGACCCTGT  
87 CACAAGATTAAGACTCCTTATT  
88 TAAGCCCATTTAGCTATATTTTC  
89 CTTAGAGCGAACCAGACCGGAAGCGCAAAAAGA  
90 TCATTTTTACCGBAATCATAATTAATCAACAT  
91 ACGGGTATTAGTATCATATGCGTTATTCGCGTCTGGCCTTTGGTGCCG  
92 ATAATCGGGTATAAAGCCAACGCTTTTTTTAACCAATAGGTTATCATC  
93 ATCCTAATTTGAGAATCGCCATATTTAACA  
94 CTGAACAAGAAAAATAGCAAATCAGATATAGTAGGAATA  
95 CCTGTTTAGTTTTAGCGAACCTCCACGTTAAT  
96 GCTAATGCCATTTTCGAGCCAGTATATTTAAATTGTAAACTCCTGATT  
97 TGTCAGATACCGACAAAAGGTAAAGCCCCAAAACAGGAGGAAGGGT  
98 TCATATATAAGATTCAAAGGGTGCAATCATATGTACCCCTTGCACGT  
99 TTCAACGGTCAAATCACCATCAATATGAT  
100 TACTTTTGCAGGAGATTTGCCAGTTACAAAAGAAACACC  
101 TACCAAAAAGAAACGATTTTTTGATATTCAT  
102 AAAGCTAAATGCCGGAGAGGGTAGTCATTGCCTGAGAGTCCGTCAGAT  
103 TAGCAAAAAGATAGCTTAGATTAAGTCCTTGAAAACATAGCACATCGGG  
104 ATCCAATAATAGTGAATTTATCAAATCGTCGCTATTAATTTGCTTTG  
105 GCATCAATGACTACCTTTTTAACCTCCGGC

106 TTGGGGCGCGAGCTGTGAGCGCTAATATCAGAACGTAGA  
107 ATAACCTGATAATAAGAGCAAGAAATAATAAC  
108 ATTTTCGCAAAATGCTGATGCAAATTTACCTTTTTTAATGGTTCAATTA  
109 GAACGAGTGAACGCGAGAAAACCTTAAAATTAATTACATTTCAAACATC  
110 CATTCCATGTTAATTTTCATCTTCTACCGTAATGGGATAGGTGCATCTG  
111 ATATGCAATTTGAAATACCGACCGTGTGAT  
112 TGCTGTAGCTCAACAGAAGCCCGAAAGACTTCGGAATCG  
113 AAGGCGTTAAATAAGAATAAACGCGGATGG  
114 AGCCTGTTTTAATTGCTCCTTTTGGGATTAGAGAGTACCTGACGATAA  
115 TCTTACCACTGTCTTTCCTTATCACTCATCGAGAACAAGCAGCAACAC  
116 GGGCTTAATTACGAGCATGTAGAACATCGTAGGAATCATTTAACGCCA  
117 CAACATGTAATTTAGGCAGAGGAGAACGCG  
118 ATATAAAGCGACGACAATAAACAATTGAAGCCTTAAATCATATAACCAG  
119 TGTAGGTATTTAAATGCAATGCCTTGCACCCAGCTACAATATTACCTT  
120 CGGAGACACAAGGATAAAAATTTTCCAACGCTAACGAGCGAGATGGTT  
121 AACCGTTCTAGCTGATAAATTAATCGGTTG  
122 GAGAGATCTTAAGCAATAAAGCCTAAAATAGCAGCCTTTACCTTCATC  
123 AAGAGTCAAATCATAACAGGCAAGGAAAACAGGGAAGCGCACGGTGTAC  
124 GTCTGAGATCTACTAATAGTAGTAACTGAACACCCTGAACATATAAAA  
125 GTTGGGTTATATAACTATATGTAATGGTCA  
126 AAGACAAAAGATTTAGTTTGACCAAGCTATCTTACCGAAGCAAAGTTA  
127 ATATTTTAATAACAGTTGATTCCCATCAGGTCTTTACCCTTGACCATA  
128 TTTAATGGCTAAAGTACGGTGTCTAGCAAAGCGGATTGCATCAAATGC  
129 TAAATGTGTCTCGCACTCCAGCCAGCCGCTATTACGCCAGC  
130 AATTCGCATTAATTTCAATTC  
131 ATCGATGAACGGTAATAGATTT  
132 AATATATGTGAGTGAAGAGGCG  
133 TCGGATTCTCCGTGGGATCGGC  
134 GGAAGAAGCGAGTAACAACCCG  
135 GAAACCAGCTGTTGGGAAGGGCGATAACAACCTAATAGATTAGGCGAAA  
136 ATATTCCTACCAGAAGGAGCGGAAAATACATTTGAGGATTTAGAAG  
137 GATGATGGTTGTTAAATCAGCTCACAAACAGTA  
138 ATATAAGTTAATATTTTGTAA  
139 GTTTGGATGTAACATTATCATT  
140 TAGAACCTTTGCCCGAACGTTATTACTCGTATTAAATCCTATTGCCCT  
141 AAAACAGAACGAGCCGGAAGCATACTAACTCACATTAATTGCGTTG  
142 AATTGCGTCGTAAAACCTAGCATGTAGAAAGGC  
143 GTTTAATGGAGCAAACAAGAGA  
144 GAATATAACAATTGTTATCCGCTC  
145 AGAAACAACGTAATCATGGTCATAAAACCTGTCGTGCCAGAGGCGGTT  
146 AATACCAATCTAGAGGATCCCCGGAATGAAAAATCTAAAGCATCA  
147 ATCGCGCATAACCTTGCTTCTGTAAATCATAG  
148 ATTCATAAACAGTACATAAATC



149 CCTGAGCACCAGTGCCAAGCTTG  
 150 AAGAAAACGTTTTCCAGTCACGACTCAATCAATATCTGGGTCAGTAT  
 151 CCAGTTTGGCTGCAAGGCGATTAACAGTTGAAAGGAATTGAGGAAG  
 152 ACGACAGTAACAAACGGCGGATTGGACCTAAA  
 153 GGCCTCTTTTTCCGGCACCGCTTCCCTGTAGCCAGCTTTCCTAGAAAA  
 154 CTGCGCAAGCAAAGCGCCATTCGCAACGCCATCAAAAATAATACAAAT  
 155 CGGAACAAAGAAACCGATTATCA  
 156 AAGTTTGATATACTTCTGAATAATAGATTGTATAAGCAAATAAGAGA  
 157 AGCCTGGGACCATATCAAAATTATGGTTGATAATCAGAAAGAGTAATG  
 158 AATTCCACACAACATAATAAAGA  
 159 CTGTGTGAAGTAACAGTACTTTTTACAAAGGCTATCAGGCTATTTTT  
 160 CTCGAATTTAACGGATTCGCCTGATAATTTTTCCCTTAGAAACGCTGAG  
 161 TGCCTGCAGGTCGACGTTACAAA  
 162 AACGACGGAAAGAAGATGATGAAAAACAATTTTCATTTGAACCAATCGC  
 163 ACGCCAGGGGGCGCATCGTAACCGTCACGTTGGTGTAGATTTTCAAAT  
 164 GCGAAAGGGGGATGTAGGGGACG  
 165 TCTAAAATATCTTTAGGAGCACTCGGTGCG  
 166 AGACTTTACAAACAATTGACAAATTTTAA  
 167 CACTGCCCGCTTTCCAGTCGGGGCTGTTTC  
 168 GCTGAACCTCAAATATCAAACCCGTTGTAA  
 169 ATCCTGTTGGAACAAGAGTCCACTATTAAGA  
 170 GCAGCAAGCGGTCCACTCCAAC  
 171 TCACCGCCGAAAAACCGTCTATCAGCTATTAGTCTTTAATAGACGGGCA  
 172 ACAGCTGGTGCCTAATGAGTGAGAAGTGTA  
 173 TTTCTTTTCACCAGTGGCGCGA  
 174 TCGGTATTCTAAAACATCGCCATTAAAAATAC  
 175 GCTGAGAGCCAGCAGCCCACCA  
 176 TAACACCGAAACAGAGGTGAGGCGGCCCGAGA  
 177 ATCGGCAAAATCCCTTAGTGTT  
 178 CAGTTTTGATGGTGGTTCCGAA  
 179 ACGTGGACGCTGGTTTGCCCCAGCAGAGCCGTCAATAGATCATTGAGG  
 180 AAGGGCTGGCCCTGAGAGAGTT  
 181 ATAGCCGGGCGCCAGGGTGGTT  
 182 CGAACGAAGCCAACGCGCGGGGAGCTGCATTAATGAATCGGTACCGAG  
 183 AAGATACCTGCAACAGTGCCAC  
 184 TAGGGTTGATAAATCAAAAGAATATCAGTTGGCAAATCAAGTTGGGTA

**Table S6. Square origami modified staples and bridges that hybridize with  $\Phi$ X 174 scaffolds to make 3 by 3 super-structures**

**Modified staples for each triangle origami**

21101;ATCGGCATTTTCGGTCATAGCCAGCCACCACCCTCATTCTTCGGCG

21102;AATCTTTTGAACCGCCACCCTCAGCCCTTATT

21105;AAACCAAAGAGCCACCACCGGAACCCGTACTCAGGAGGTTGGCAGATT  
21106;TTAAATTTGGAATAGGTGTATCACGCCTCCC  
21109;AAAGGAATCACCTCAGAGCCGCCAGTACCAGGCCGATAAACTGGAAA  
21110;GGTGGCGATAGCGGGGTTTTGCTCACCAGAAC

21201;GATTGGCCTTGATATTCACAAACCCCTGCCTATTTGCGGGGAAGCC  
21202;GCAGGAGATATAAACAGTTAATGCCAAATAAA  
21205;TCAGGACGTACCGTTCCAGTAAGCACTGGTAATAAGTTTTCTCAGCA  
21206;ACGAATCAGATGATACAGGAGTGTGTCATACAT  
21209;TAATTTCAACACTAAAACACTCATTGAGGAAGTTTCCATTACGCGGCG  
21210;AACAGGGTACTAAAGACTTTTTCACTTTGACC

21301;TCGCCTGATAAATTGTGTCGAACCGCTTTTGCGGGATCGAATCTCT  
21302;GAAAACGATGCAGGGAGTTAAAGGATCCGCGA  
21305;AAGAGTAACAATCATAAGGGAACCACAACAACCATCGCCCAGGAACAA  
21306;ATGTTTATAGTTGCGCCGACAATGGAAGTAC  
21309;GAAACGCAATCAATAGAAAATTCATTATCAGCTTGCTTTCAACGACGT  
21310;ACATCATACTTTAATTGTATCGGTTATGGTTT

31101;ATCGGCATTTTCGGTCATAGCCAGCCACCACCCTCATTACGCTGCA  
31102;TTGGTCAGGAACCGCCACCCTCAGCCCTTATT  
31105;AAACCAAAGAGCCACCACCGGAACCCGTACTCAGGAGGTTATAATGTC  
31106;GTCGTCATCGGAATAGGTGTATCACGCCTCCC  
31109;AAAGGAATCACCTCAGAGCCGCCAGTACCAGGCCGATAAGAGCAGTC  
31110;GGCAGCAATAGCGGGGTTTTGCTCACCAGAAC

31201;GATTGGCCTTGATATTCACAAACCCCTGCCTATTTGCGGTCGGTACG  
31202;GCTTTAAATATAAACAGTTAATGCCAAATAAA  
31205;TCAGGACGTACCGTTCCAGTAAGCACTGGTAATAAGTTTTACAAATGC  
31206;TATCAGGGGATGATACAGGAGTGTGTCATACAT  
31209;TAATTTCAACACTAAAACACTCATTGAGGAAGTTTCCATTATAACCAG  
31210;GAGAGGAGACTAAAGACTTTTTCACTTTGACC

32401;GTAAATATTGACGGAAATTATTTAGAAAGGAACAACACTATAGCAAGG  
32402;AAAGACGGTTCAGCGGAGTGAGAACATTAAAG  
32405;CCAGAAGGAGAGCCAGCAAATCAAGTAAATGAATTTTCTGCCAGCGA  
32406;AATGGTAACGTCTTTCCAGACGTTCCAGTAGC  
32409;TTTAAACACCATCGATAGCAGCACCATTCCACAGACAGCCAGATGGGA  
32410;CGCTCGGCACTACAACGCCTGTAGCGTAATCA

32101;ATCGGCATTTTCGGTCATAGCCAGCCACCACCCTCATTCCCCTGCA  
32102;ACCTACATGAACCGCCACCCTCAGCCCTTATT  
32105;AAACCAAAGAGCCACCACCGGAACCCGTACTCAGGAGGTTGTACCTCG  
32106;CCAGGGCGCGGAATAGGTGTATCACGCCTCCC  
32109;AAAGGAATCACCTCAGAGCCGCCAGTACCAGGCCGATAACATCACTC  
32110;TTGACGCATAGCGGGGTTTTGCTCACCAGAAC

32201;GATTGGCCTTGATATTCACAAACCCCTGCCTATTTTCGGGCAAGGTA  
32202;CGGCTTTATATAAACAGTTAATGCCAAATAAA  
32205;TCAGGACGTACCGTTCCAGTAAGCACTGGTAATAAGTTTTTCGTAAATT  
32206;GAGACAGGGATGATACAGGAGTGTGTCATACAT  
32209;TAATTTCAACACTAAAACACTCATTGAGGAAGTTTCCATTGCAATGAC  
32210;ACAGGAGCACTAAAGACTTTTTCACTTTGACC

33401;GTAAATATTGACGGAAATTATTTAGAAAGGAACAACACTAGTTACTCG  
33402;ATCTTCGGTTCAGCGGAGTGAGAACATTAAG  
33405;CCAGAAGGAGAGCCAGCAAATCAAGTAAATGAATTTTCTTTAATAGA  
33406;AAACGTACCGTCTTTCCAGACGTTCCAGTAGC  
33409;TTTAAACACCATCGATAGCAGCACCATTCCACAGACAGCCACCTATTA  
33410;GGACTCAGACTACAACGCCTGTAGCGTAATCA

33101;ATCGGCATTTTCGGTCATAGCCAGCCACCACCCTCATTGAACAAAA  
33102;ACCAGTCCGAACCGCCACCCTCAGCCCTTATT  
33105;AAACCAAAGAGCCACCACCGGAACCCGTACTCAGGAGGTTCTCCTCAT  
33106;TGACAGAACGGAATAGGTGTATCACGCCTCCC  
33109;AAAGGAATCACCTCAGAGCCGCCAGTACCAGGCCGGATAAGAGCTTCT  
33110;AGGTCTGAATAGCGGGGTTTTGCTCACCAGAAC

23301;TCGCCTGATAAATTGTGTCTGAACCGCTTTTTCGGGATCATATCCGA  
23302;GTCATGGATGCAGGGAGTTAAAGGATCCGCGA  
23305;AAGAGTAACAATCATAAGGGAACCACAACAACCATCGCCCTCATTTTT  
23306;ATTTGAGCAGTTGCGCCGACAATGGAAGTAC  
23309;GAAACGCAATCAATAGAAAATTCATTATCAGCTTGCTTTTCGTCGGCTA  
23310;CCTCAATCCTTTAATTGTATCGGTTATGGTTT

23401;GTAAATATTGACGGAAATTATTTAGAAAGGAACAACACTACGTCGTAA  
23402;GGATTAAGTTCAGCGGAGTGAGAACATTAAG  
23405;CCAGAAGGAGAGCCAGCAAATCAAGTAAATGAATTTTCTTTTCATCC  
23406;TCTGATTCCGTCTTTCCAGACGTTCCAGTAGC  
23409;TTTAAACACCATCGATAGCAGCACCATTCCACAGACAGCCGTTTTTAG  
23410;TTAGCTCCACTACAACGCCTGTAGCGTAATCA

23101;ATCGGCATTTTCGGTCATAGCCAGCCACCACCCTCATTAGCCACAT  
23102;ATAACTGGGAACCGCCACCCTCAGCCCTTATT  
23105;AAACCAAAGAGCCACCACCGGAACCCGTACTCAGGAGGTTGGCCACAA  
23106;AAAGCGTCCGGAATAGGTGTATCACGCCTCCC  
23109;AAAGGAATCACCTCAGAGCCGCCAGTACCAGGCCGGATAAAACCATAA  
23110;AGCTATTTTAGCGGGGTTTTGCTCACCAGAAC

13301;TCGCCTGATAAATTGTGTCTGAACCGCTTTTTCGGGATCCCATTAGC  
13302;ACACAAAATGCAGGGAGTTAAAGGATCCGCGA  
13305;AAGAGTAACAATCATAAGGGAACCACAACAACCATCGCCCCCTTGCGA

13306;CCATACGAAGTTGCGCCGACAATGGAACTGAC  
13309;GAAACGCAATCAATAGAAAATTCATTATCAGCTTGCTTTCGGGATTAT  
13310;TCGGTCGTCTTTAATTGTATCGGTTATGGTTT

13401;GTAAATATTGACGGAAATTATTTAGAAAGGAACAACCTACCTGTCGC  
13402;GCTGAATATTCAGCGGAGTGAGAACATTAAAG  
13405;CCAGAAGGAGAGCCAGCAAATCAAGTAAATGAATTTTCTCTCCAGCA  
13406;CTTAATACCGTCTTTCCAGACGTTCCAGTAGC  
13409;TTTAAACACCATCGATAGCAGCACCATTCCACAGACAGCCATATCCTT  
13410;GCCAGCTTACTACAACGCCTGTAGCGTAATCA

12201;GATTGGCCTTGATATTCACAAACCCCTGCCTATTTTCGGGAGCACAT  
12202;TTCATCCATATAAACAGTTAATGCCAAATAAA  
12205;TCAGGACGTACCGTTCCAGTAAGCACTGGTAATAAGTTTTCGAACGTC  
12206;CCGTCAACGATGATACAGGAGTGTGTCATACAT  
12209;TAATTTCAACACTAAAACACTCATTGAGGAAGTTTCCATTGCATACGA  
12210;CCAAGAGCACTAAAGACTTTTTCACTTTGACC

12301;TCGCCTGATAAATTGTGTCGAACCGCTTTTGCGGGATCGAAAGAGT  
12302;TCAATAGCTGCAGGGAGTTAAAGGATCCGCGA  
12305;AAGAGTAACAATCATAAGGGAACCACAACAACCATCGCCCAATAATCA  
12306;GGTAATAAAGTTGCGCCGACAATGGAACTGAC  
12309;GAAACGCAATCAATAGAAAATTCATTATCAGCTTGCTTTCATCAGG  
12310;CCTTGAATCTTTAATTGTATCGGTTATGGTTT

22101;ATCGGCATTTTCGGTCATAGCCAGCCACCACCCTCATTACTTGCCA  
22102;CAAGCAACGAACCGCCACCCTCAGCCCTTATT  
22105;AAACCAAAGAGCCACCACCGGAACCCGTAICTCAGGAGGTTTCGTACCTT  
22106;AGCTTTAGCGGAATAGGTGTATCACGCCTCCC  
22109;AAAGGAATCACCTCAGAGCCGCCAGTACCAGGCGGATAAAGGCATGA  
22110;GGGTGTCATAGCGGGGTTTTGCTCACCAGAAC

22201;GATTGGCCTTGATATTCACAAACCCCTGCCTATTTTCGGTACCGTCT  
22202;AAGTATCGTATAAACAGTTAATGCCAAATAAA  
22205;TCAGGACGTACCGTTCCAGTAAGCACTGGTAATAAGTTTTAACCACAC  
22206;GACGACATGATGATACAGGAGTGTGTCATACAT  
22209;TAATTTCAACACTAAAACACTCATTGAGGAAGTTTCCATTGAAGAGCC  
22210;GTTTGCTGACTAAAGACTTTTTCACTTTGACC

22301;TCGCCTGATAAATTGTGTCGAACCGCTTTTGCGGGATCTTGGTCAT  
22302;AGCCGTTTTGCAGGGAGTTAAAGGATCCGCGA  
22305;AAGAGTAACAATCATAAGGGAACCACAACAACCATCGCCCGAAACCTG  
22306;TTGGTGTTAGTTGCGCCGACAATGGAACTGAC  
22309;GAAACGCAATCAATAGAAAATTCATTATCAGCTTGCTTTCCTTCTGT  
22310;CATTTTGTCTTTAATTGTATCGGTTATGGTTT

22401;GTAAATATTGACGGAAATTATTTAGAAAGGAACAACCTACCAGCAAT  
22402;TTTTGCATTTTCAGCGGAGTGAGAACATTAAG  
22405;CCAGAAGGAGAGCCAGCAAAATCAAGTAAATGAATTTTCTTTTAGTA  
22406;CAAATCCGCGTCTTTCCAGACGTTCCAGTAGC  
22409;TTTAAACACCATCGATAGCAGCACCATTCCACAGACAGCCACCAGCAC  
22410;CTCAGGAACTACAACGCCTGTAGCGTAATCA

12401;GTAAATATTGACGGAAATTATTTAGAAAGGAACAACCTAAGCAAGCA  
12402;ACCGGAGGTTTCAGCGGAGTGAGAACATTAAG  
12405;CCAGAAGGAGAGCCAGCAAAATCAAGTAAATGAATTTTCTATGGCGCC  
12406;GCAATACCCGTCTTTCCAGACGTTCCAGTAGC  
12409;TTTAAACACCATCGATAGCAGCACCATTCCACAGACAGCCCTTAAGTG  
12410;CTCTTTAACTACAACGCCTGTAGCGTAATCA

11201;GATTGGCCTTGATATTCACAAACCCCTGCCTATTTTCGGGAAGGACG  
11202;CCTTGACGTATAAACAGTTAATGCCAAATAAA  
11205;TCAGGACGTACCGTTCCAGTAAGCACTGGTAATAAGTTTTAGGATAAA  
11206;GAGGGTAGGATGATACAGGAGTGTGTCATACAT  
11209;TAATTTCAACACTAAAACACTCATTGAGGAAGTTTCCATTCAGGCAA  
11210;TCAAAGCACTAAAGACTTTTTCACTTTGACC

11301;TCGCCTGATAAATTGTGTGCGAACCGCTTTTTCGGGATCATCCATCT  
11302;ACCACCATTGCAGGGAGTTAAAGGATCCGCGA  
11305;AAGAGTAACAATCATAAGGGAACCACAACAACCATCGCCCAACGTTGA  
11306;GTCTGTAAAGTTGCGCCGACAATGGAAGTAC  
11309;GAAACGCAATCAATAGAAAATTCATTATCAGCTTGCTTTCTGAGAACC  
11310;AGTTTGAACCTTAAATTGTATCGGTTATGGTT

### **Bridges**

2101;CCCCTCAGCGGCAAAAAACCTACCGCGCTTC  
2102;TAAGCAGAATTAATAATTTTACCG  
2103;TTATAACCAAGTCTGAAACATGATTAAACTCC  
2104;TTATGGCGAGAAATAATCACACTC  
2105;ATCACGAAGTCATGATAGAAAAAA  
2106;AGCTTATCTGAATCGCGAGTGGTC  
2107;GCGATAAAGCTGGAGTAACAGAAG  
2108;AACAGGTGCCGAAGAACGGTCACA  
2109;AACCTGACTATTCCACCTTTAGGT  
2110;CGATGTAGTGCAACAACCTGAACGG  
2111;CACTGGTCCAAACTATCAAAATAT  
2112;TACCAGCATTAAACCGTATAATCAT  
2113;ATAAGTACGCGTTCTTTGAAGAAA  
2114;GAATGCAAGCAAATCACCAGAAGG

3101;TTCAAGAAATCACGAGTATCCTTT  
3102;ATGCAGCAGCAAGATAGGTGATAA

3103;AACATACGAAGGCGCAGCATTAAG  
3104;GCTCCCAATAACGATACCACTGAC  
3105;ATCTTAAACAGAGGAAGCATCAGC  
3106;GCGTCAACCATAACCAGCTTCTTAG  
3107;CCAGAACGGAAAACATTTGATTCT  
3108;AGCTCTTTCCTTCATAGAAATTC  
3109;GCAAGTTGTGATTGTCCAGTTGCA  
3110;CTCGGCAATCTCTTTCCCATACAA  
3111;CGCCAGCAATATCGGTGAGTCTCA  
3112;CTCTTTTTATAAGTCAAAGCACCT

4101;TTACCTCCAAATGAAGAGCGTCATAAGAGGTT  
4102;CGGTTGTCAAATAACATCATGGTA  
4103;TGAAGTAATTAGAGCGCATGACAAGTAAAGGA  
4104;GCCAGATGCCAGAGATCACGTTC  
4105;TATGCAAATTAGCATATTCCATCA  
4106;TTGGTCAGAGCAGCTTGCAGACCC  
4107;AATAGATGACCAGAAAACCTGGCCT  
4108;AGGTCTGTTGAACACGTGGTAGAA  
4109;TTGGCGAGAAAGCTCAGGCACAGA  
4110;AGAAACGCGTCTCAGGAGGAAGCG  
4111;CAAATGTTACATAGTGCCATGCTC  
4112;ACAAGCGCAAGAGTAATTTGAGAT  
4113;CGGAAACCATAACGAGAGTAGGGC  
4114;TTAGTCGCCATCATCTTGATTAAG

5101;GTCAGGCAGACATAATTTATCCTC  
5102;GCCAGTTTGAATATTATCCACGGC  
5103;ATAGTTGTTATAGATAGCGGCATA  
5104;AAGGTCATTTCAAATAACCCTGAA  
5105;TTAGGGATACCAGCAAGGAAGCCA  
5106;TAAGACGACCAATCTGTTTATTGG  
5107;TTAATCGTGCCAAGAAGTAGTTGA  
5108;TAACCGGAAAGCGGCATGGTCAAT  
5109;TAGTGTTACCATCTCGAAGGAGTC  
5110;AGAGCGCCAACGGCGTACAGTCGG  
5111;TGGCATTAAACCCATCCAATGGAG  
5112;CCACGACGCTTCATGAACTTAATCCACTGTTC  
5113;ACCATAAATCTACAGTAGAGTCAA  
5114;ATAAAAAGTAAAAATGCGTGACGATGAGGGAC

4201;ATTAAAATTCGTATTCTGGCGTGA  
4202;GCATATACCTGGTCTTTGTTGACC  
4203;ACCAAAGACGAGCGCCAAGCATCT  
4204;TGATAAGCTTTACGCTTGCCTTTA  
4205;CAACGGCTACGCGAGCAGTAGACT

4206;TTCCATAATAGACGCAGCGGACGA  
4207;AGCGCCAGAACGTTTTTGGAAAGA  
4208;CTGTTGCTTTACCTTTAGACATTA  
4209;CTTCCGCATTGGCGCATAATCTCG  
4210;GAGCTTGAGTAAGCATCGTAATTT  
4211;CGTTTTCTTCTGCGTCTACTGACC  
4212;TGGTAAAAAGTAAGAACGTCAGTG

5201;AACGCGAATTTTAAAATGTCAACA  
5202;ATAGTAATCCACGCTCCAATTCAG  
5203;ACCGGACGCTCGACGCACAGCATC  
5204;GTGGTTGACATTAATAATGTTTTC  
5205;CAGCGCCTTGACTCATGATTTCTT  
5206;GGATTGTTGAGTAACTTCCATGAT  
5207;CCGTTTGAATGTTGACCGGTCTGG  
5208;GGCCAAAGGGGATGAACATAATAA  
5209;GGCAGCAAAGAAGCCTGAATGAGC  
5210;TAAATCCAAAACGGCTAAACTCA  
5211;AGGAAAGCGAGGGTATTCGAAATC  
5212;TCAGAAAACCCACAAAGTCCAGCGTACCATAA  
5213;ACGCAAGCTAGCAATCCAAACTTT  
5214;GCACGAGAGCGGTCAGCTCAACGCAGCGACGA

4301;TGTGACTCGTTCTGCTTCAATATC  
4302;TCATCTCTCTTTTTGCATATCTAA  
4303;TTGACGAACGTGCCAATTTCCCAG  
4304;CAGTAACTGCATATTAAGCCACTT  
4305;CCAACGCGGTTGCGCCGCCAAAAC  
4306;AGATTTGTCGTCACAGTCAGTTTT  
4307;TCGTTAGTTGATGGCGGCGCATAA  
4308;ATCGAAGCAAAGGTCGCAAAGTAA  
4309;CGAGCTGCAGGTTGGATACGCCAA  
4310;AGCGATAAAACTCTGCGCAAGGAT  
4311;TTTTCTCATTTTCCGCACTTCTGC  
4312;AAGTGTTACAGCAGTCCACTTCGATTTAATTC  
4313;GTAAACAATTTGACTCATCAGAA  
4314;CTTTATCAAGATAATTGCAGTAGTAATTCCTG

3201;TTCCAGAAAGGTCCATATCTGACT  
3202;TAGACCTTTAGCAGCAATTGTTCC  
3203;GCAACAGCTTTATCAATCCATTCT  
3204;TGAGTTGTTACCATGAAAAATATC  
3205;CAGAAGCAAAGTAGCGACAGCTTG  
3206;TGAACAGCTTCTTGGGGCATCAGT  
3207;TAGAAATATCCTTTGCCGGCTCAT  
3208;CGAAGTTGAGTAGCGCCAATATGA

3209;ATACCGCTTTGTCATTGTGAGCAT  
3210;CACTCCGTGGACAGATGATTCTGC  
3211;ATGAACTAAGTCAACCGGTAAGTT  
3112;CCCAGCTTTCAGCACTAACCTTGC

2301;AGAAACCAGTCAAAAACGATAAAC  
2302;CAGCCAACGTGAGAGTACAGCCAT  
2303;TAGCTTTAAGCGGCTCGCCTCTAA  
2304;CATAAAACACCTTTAGCATCAACA  
2305;CCAACCAGAGTCACGCAAAGCATT  
2306;CCAATATCACGAAAATAACGTGAA  
2307;CTGCGTGTAGCGAACTAGCAAGAA  
2308;CCCTCGGCGCGATGGGCATACTGT  
2309;GGCCACGTGCGTGTGAATCATTAG  
2310;ATACTGATAGCAGTCGATTTTGCA  
2311;AACTGGCGGCGATTGCACTCAGGC  
2312;TGTACCATGTACCCGACGACCAAATTAGGGT  
2313;CAACGCTAATGGAAATGAAGACGG  
2314;GCATAAAGTGCACCGCCCTGTAGGAAGTGTCC

1201;TGGTCTATAGTGTTATGTCCCCTTCGGGGCGG  
1202;CATTTTTCTAATATCAAGTTGGGG  
1203;TGTAGCATAACGTCTTCTCGTTCTCTAAAAAC  
1204;GCGGCAAACTGCGTATGTGCCAA  
1205;TTAACTTCTCAGTAACGTTCAAGCA  
1206;AAGAGGGCAGATACAAACTCATCA  
1207;AGAAGCAGATTATACTCATCGCGA  
1208;CTTCTTTTTGGGGTACCTTATGG  
1209;ATACATATCACCATTACACTCATC  
1210;ATCTTGAATCGAACTCAACGCCCT  
1211;AAAGACAGATTTTCATAGTGGAGGC  
1212;GCAAAGCCTCTACGCGAATCTCTT  
1213;TTGATGCGGTTATCCACATCAAAC  
1214;ATTGCATTTCTGCTTATGGAAGCC

2207;GAACGAACCATAAAAATTCAGAAG  
2208;GCGTGACAAGCCTCCAAGATTTGG  
2209;AAACATACATACGCTCAAAGTCAA  
2210;AGGTTTAAGAGCCTCGAATTGGGA  
2211;ATCCTGACGGTTATTTACAAGCC  
2212;AGAAATGCCCTAGACAAATTAGAG

2201;CCAAGTCCGCATCACCCATGCCTA  
2202;GGCAGATTTAATAACCAAACCAAAT  
2203;TTATCAGAAACGGCAGCATTAGAG  
2204;GTTAGGAAAAGTGCCAGCCTGCAA



2205;CAAGAAGTAAAACCTAGGGGCGGCC  
2206;CCATAGCACCAGAAACCTTTACC

1101;ACCAACATAAACGTTATAGACCAAACCATGAA  
1102;GGTAAAGTTTGCCCGGCGTACGGG  
1103;TCAATAGTAACCAATCCGCGGCATTTAGTAGC  
1104;TAACCTGATTCAGCGACACACAGT  
1105;GTATAATAACCACCATCAAATAAT  
1106;GCTGGAGACATGGCGACCATTCAA  
1107;CATCATAGAACATAAATCACCTCA  
1108;GCCAGCAATAGCACCAGCAGTCGG  
1109;TCGGAACCGAAGAAGAGAGCAGAA  
1110;ACCAGCAACTCAAAGCGAACCAA  
1111;AAATTTAGTCCAAACAATTTAGAC  
1112;CGGCTTTTTGACCGCCGGTCGGCA  
1113;AATATCAGCACCAACATGAATGCC  
1114;CATCACCTGAAACAACCTGATTAG

**Table S7. Unmodified hexagonal DNA origami staples**

|    |                                             |
|----|---------------------------------------------|
| 1  | TGATGATACAGGAGT                             |
| 2  | TTACCGTTCCAGTAAGCACCATTA                    |
| 3  | TAAAGCCAGAATGGAACCAATGAA                    |
| 4  | GCCTTGATATTCACAAAGTAGCGA                    |
| 5  | TTGACAGGAGGTTGAGCAGACTGT                    |
| 6  | GAGCCGCCGCCAGCA                             |
| 7  | AATTAGAGCCAGCAAATCACCAGTAGCGTCATACATGGCTTT  |
| 8  | ATCTTGACAAGGCCGGAACGTCAAGCGCAGTCTCTGAAT     |
| 9  | GCGCATAGTAGCAGCACCGTAATCACAAATAAATCCTCAT    |
| 10 | GAAAGAGGAGTTTGCCTTTAGCGTGCAGGTCAGACGATTG    |
| 11 | AAAGCTAAAATAAGAGAATATAAACCAACTTT            |
| 12 | CACCAGAACCACCAC                             |
| 13 | GCCACCCTCAGAGCCAGCCATCTT                    |
| 14 | CCGCCTCCCTCAGAGCAGAGCCAC                    |
| 15 | CACGCATAACCGATATGCCGCTTT                    |
| 16 | TAGTTGCGCCGACAATGAAAGACA                    |
| 17 | ACAGCTTGATACCGA                             |
| 18 | TCGGTCATAGCCCCCTTATTAGCGTTTCCACCCTCAGAGCCGC |
| 19 | AATCCGCGCAAATCACCAGAACCCGCCACCCTCAGAACC     |
| 20 | GATTTGTATTGCAGGGAGTTAAAGATTCGGTCGCTGAGGC    |
| 21 | ATTATACCGTACCCTCAGCAGCGACAACAACCATCGCC      |
| 22 | CGAGGTGAATTTCTT                             |
| 23 | CCTTTAATTGTATCGGACTTTTTT                    |
| 24 | GAAAATCTCCAAAAAATCAAAAAT                    |
| 25 | AAAGGAATTGCGAATAAATAACAT                    |

26 TTTCAGCGGAGTGAGAGGAGAATT  
27 AACAACTTTCAACAG  
28 CGGCTACAGAGGCTTTGAGGACTAAAGTTTATCAGCTTGCTTT  
29 GTAATGCCGTTTCCATTAAACGGGAAGGCTCCAAAAGGAG  
30 TAAGAAACCAGCCTTTACAGAGAGATAATTTTTTTCACGTT  
31 ATAAACAGGGAAGCGCATTAGACGATAGAAAGGAACAAC  
32 TGTATGGGATTTTGC  
33 TCGTCTTTCCAGACGTGAGAGATA  
34 CCTCATAGTTAGCGTAAATAATAA  
35 AACTACAACGCCTGTATAGCTATC  
36 GTACCGTAACACTGAGGTAAGCAG  
37 CCAATAGGAACCCAT  
38 TCAGAGGGTAATTGAGCGCTAATATCATAGTAAATGAATTTTC  
39 TTGCACCCGAATTGAGTTAAGCCCACGATCTAAAGTTTTG  
40 GCAAAGAAACAATGAAATAGCAAGCATTCCACAGACAGC  
41 GACGATAAGCCCTTTTTAAGAAAATTCGTCACCAGTACA  
42 TTTCAGGGATAGCAA  
43 AGAACCGCCACCCTCACGGAATAC  
44 TTAGTACCGCCACCCTCTCCTTAT  
45 CCGGAATAGGTGTATCAAATACA  
46 AGTGCCGTCGAGAGGGAGAAACGC  
47 AGTACCAGGCGGATA  
48 AAGGAAACCGAGGAAACGCAATAATAAGAGCCACCACCCTCAT  
49 AACTAATGACTGGCATGATTAAGACAGAACCGCCACCCTC  
50 TTCATCAGATGTTAGCAAACGTAGACCGTACTCAGGAGGT  
51 CTAACGGAGGTGGCAACATATAAATTGATATAAGTATAGC  
52 TTAGCGGGGTTTTGC  
53 GAGGCTGAGACTCCTCATATGGTT  
54 GAACCTATTATTCTGAGACATTCA  
55 GTATAAACAGTTAATGTATTGACG  
56 TAACGGGGTCAGTGCCATCACCGT  
57 ACTGGTAATAAGTTT  
58 TATTTTGTCACAATCAATAGAAAATTCAAGAGAAGGATTAGGA  
59 ACCGATTGTAATTTCAACTTTAATAATAAGGCGTTAAATAGACGCTGA  
60 ATTACCTTCCAAAGACAAAAGGGCAACATGAAAGTATTAA  
61 AGATGGTTAGGGAGGGAAGGTAAACCCCCTGCCTATTTTCG  
62 GAAACACCTCATTAAAGGTGAATTTTGAGTAACAGTGCCC  
63 CCATTAGCAAGAACCGGATATTCATCAACAGTAGGGCTTACAAGGATA  
64 ACCATCGAGCTGGCTGACCTTCATTTTAAACAACGCCAACAACTTTT  
65 CAGAATCAACAGATGAACGGTGTAGCATTTTCGAGCCAGTATCGGTTG  
66 AGCGCGTTTTTCATCGGCAT  
67 CAATCATAAGGGAACCGAACTGAGTACCGACAAAAGGTAAAG  
68 ACCAGTATAAAGCCAACGCTTACCCAAATCAACGTAACAAAGC

69 AAAATTTTTAGAACCCATCATATA  
70 GCGGGAGATGAGAGTCTGGAGCAATAGCATGTCAATCATACGCTGAGA  
71 TACCAAAAATTCGACAACCTCGTAATTAGACTTTACAAACAGCATCAC  
72 TAAGCAATAAAGCCTCAGAGCAT  
73 TAGCTATTTTTGAGAGATC  
74 TACAAAGGATCAGAAAAGCCCCAAAACAGG  
75 TCATTGCCAGCCTTTATTTCAACGATTGAGAATCGCCATACAAGAGTA  
76 ATCGATGAACATTATGACCCTGTATGTAATTTAGGCAGAGCAGACCAG  
77 TTTGCCCGAACGTTATTAA  
78 AATACATTTGAGGATTTAGAAGTTTAAATCC  
79 GGCGGTCAGTATTAACACCGGGCGCCAGGGTGGT  
80 GCCAGCAGGCCAACGCGCGGGGAGAGGCGGTT  
81 CTTGCTGAAAACCTGTCTGCGCCAGCTGCATTA  
82 TGCGTATTGCCTGCAACAGTGCCATGTACCCCGGTTGATACTATCAGG  
83 ATGAATCGCAAATGAAAAATCTAAACGGTAATCGTAAAACACAAGAGA  
84 CGCTTTCAGTCGGGACCTCAAATATCAAACCCT  
85 TTCATAATACCTGCTCCATGTTACAATAAACAACATGTTCAATCATAC  
86 CACCGGAATCATCGCCTGATAAATGCCTGTTTATCAACAATCTACTAA  
87 TGCGGGATAAGCGCGAAACAAAGTAAGAAAAATAATATCCTTTGGGGC  
88 GCATCGGAACGAGGGTAGC  
89 AACTAAAACACTCATCTTTGACCATGTAGAAACCAATCAAT  
90 ATTCTGTCCAGACGACGACTTAGCCGGAACGAGGCGCAGACG  
91 AGGCAAGGCAAAGAATTAGCAA  
92 TAGTAGTACACCAGAAGGAGCGGATTATCTAAAATATCTTAAGGAATT  
93 GCGAGCTGTGATTATCAGATGATGACGCCAGGGTTTTCCCAAGCTTGC  
94 TATTTTCACATCCTAATTTACGAGCCCCAGCG  
95 ATGGTCAATAACCTGTTTAGCTA  
96 TTAAAAGTTTGAGTAACAT  
97 TATCATTTTAATAGATTAGAGCCGTCAATAG  
98 AAAGAAACGCATTAACATCCAATAAGCTAATGCAGAACGCTGTGTCGA  
99 CATATTCAAAAGGTGGCATCAATTAGATAAGTCCTGAACACAACGGA  
100 TCAATATAATCCTGATTGT  
101 CTGCAAGGCGATTAAGTTGGGTAGCAATTCA  
102 ATCAATATCTGGTCAGTTGGCGTTGCGCTCACTG  
103 GAGGAAGGGTGCCTAATGAGTGAGCTAACTCA  
104 ATGCCTGCACGAGCCGGAAGCATAAAGTGTA  
105 CATTAATTGCAAATCAACAGTTGATAGGAGCACTAACAACCTGCGGAAC  
106 AGCCTGGGAACGACGGCCAGTGCCAGTCACGACGTTGTAAATTATCAT  
107 AATTCCACACAACATAGGTCGACTCTAGAGGATC  
108 ATGAGGAAACTACGAAGGCACCAAATTCCAAGAACGGGTAAGATTTAG  
109 GAAAATAGGATTTTTTTGTTTAAACGACTCATCGAGAACAAGATAACAGT  
110 AAAACAGCCATATTATTTATCCCTCATCGTAGGAATCATCTAAAGTA  
111 AACTGAACACCCTGAACAA

112 TCTTTCCAGAGCCTAATTTGCCAAAGCAAATCAGATATAGAA  
113 TCGGCTGTCTTTCCTTATCCCTAAAACGAAAGAGGCAAAAGA  
114 TTTGACCATTAGATACATTTTCGC  
115 TGATTCCCCAAAATTATTTGCACGAAGGGCGATCGGTGCGTAGCAATA  
116 CGGTGTCTAAATTGCGTAGATTTTCCATTCGCCATTCAGGCTTGCCTG  
117 ATATGCAATACCGCGCCCAATAGCGTTACAAA  
118 TGCTGTAGCTCAACATGTTTTAA  
119 GGATTATACTTCTGAATAA  
120 TGGAAGGGCGCCAGCTGGCGAAAGGGGGATG  
121 TACCATATAATTCTGCGAACGAGTTTAAACCAAGTACCGCTAAAATAC  
122 AAATAAAGGGAAGTTTCATTCCATCAAGCCGTTTTTATTTAATCCAAA  
123 ACGTCAGATGAATATACAG  
124 GGTGCCGAAACCAGGCAAAGCGCAGGTTTA  
125 CGGGTACCGAGCTCGAATTAATTGTTATCCGCTC  
126 TGGTCATAGGCCTCTTCGCTATTATTAGAACC  
127 CTTCTTTGCGCAAATTAACCGTTGGCTGTTTCCTGTGTGACGTAATCA  
128 AGTAGAAGTGAGGCCACCGAGTAAAAGAGTCT  
129 GTCCATCAATTAGTAATAACATCACTGCGCAACTGTTGGGTAAAACAG  
130 TGTTTTTATAATCAGA ACTCAA ACTATCGGCCTT  
131 ACCCACAAAGCTACAATTTTATCCACGCGAGGCGTTTTAGGCGGATGG  
132 GAGCAAGACTTAAATCAAGATTAGCGGGAGGTTTTGAAGCTTAATTGC  
133 TTACCGAAAAACCAAATAGCGAGGTAATAGTAAAATGTAAACTCCA  
134 ATAGCCGAACAAAGTTACC  
135 GCAACACTATCATAACCCTCGTTCAATACTGCGGAATCGTCA  
136 CTTATCCGGTATTCTAAGATGAATCTTACCAACGCTAACGAG  
137 CTTAGAGCTTAATTGCTGAATAT  
138 TCCTTTTGATTGCTTTGAATACCAACGACAGTATCGGCCTGCAACAGG  
139 ACAGGTCAAGAGGCGAATTATTCACGTAACCGTGCATCTGATTTTGAC  
140 CCGGAAGCTAGACTGGATAGCGTCTACCAGAC  
141 TTCGAGCTTCAAAGCGAACCAGA  
142 ACAGTACCTTTTACATCGG  
143 GAGAAACACAGCCAGCTTCCGGCACCGCTT  
144 TTCGCCTGATAAGAGGTCATTTTTTCGAACCTCCCGACTTGTTGCTATT  
145 AATCGCGCGGATTAGAGAGTACCTAGTTTTGCCAGAGGGGAGGCTTTT  
146 ACCTGAGCAAAAGAAGATG  
147 CACGTTGGTGTAGATGGGCGCATTTTCAATT  
148 TGGTAATATCCAGAACAATGCCAGAATCCTGAGA  
149 CAGCCATTCAGGAAGATCGCACTCATAACGGA  
150 AAAAACGCGAAAAACCGTCTATCATAGACAGGAACGGTACATTACCGC  
151 GCTCAATCATTAAGAACGTGGACTCCAACGT  
152 CAAAGGGCTCATGGAAATACCTACCCAGTTTGAGGGGACGAGTTACAA  
153 GAACAAGAGTCCACTGTCTGAAATGGATTATTTA  
154 CCAAAAGACAGATACATAACGCCATCAAATGCTTTAAACAGAAGCCCCG

155 TACGCAGTTTGGAGATTTAGGAATATGACCATAAATCAAAAAGCAAAGC  
156 TACATAAAACAACATTATTACAGGTCCAATCGCAAGACAATAAATGCT  
157 AAAGACACCACGGAATAAG  
158 TGGGAAGAAAAATCTACGTTAATTTTTCAAATATATTTTAGT  
159 AATATTCATTGAATCCCCCAAAGGAATTACGAGGCATAGTAA  
160 AAAGACTTCAAATATCGCGTTTT  
161 GGATTGCATCATTGGAATTACCTTACAACCCGTCGGATTTCAGGGACAT  
162 GATGCAAAACATAAATCAATATATCAGCTTTCATCAACATTCTGACCT  
163 ACTATATGAGAACGCGAGAAAACATAAAACGAA  
164 TCCGGCTTAGGTTGGGTTATATA  
165 GAAACAAACATCAAGAAAA  
166 CAAAATTAGCGGATTGACCGTAATGGGATAG  
167 TAACAATTTCAAAAAGATTAAGAGGTTTCAGAAAACGAGAACCACATTC  
168 GAAACAGTGACTATTATAGTCAGAATCAGGTCTTACCCTTAGAAAGA  
169 ATAACCTTGCTTCTGTAAA  
170 TTCGCGTCTGGCCTTCCTGTAGCGTGAGTGA  
171 TTGGCAGATTCACCAGTCAAGTGTTGTTCCAGTT  
172 TCTGGCCAATAAATCAAAAGAATAGCCCGAGA  
173 GAAAGCGTTGATGGTGGTTCCGAAATCGGCAA  
174 TAGGGTTGCACGACCAGTAATAAATCCGTGGGAACAAACGATTACATT  
175 AATCCCTTACAGAGATAGAACCCTTAAATGTGAGCGAGTATTTAATG  
176 GGCGAAAATCCTGTAAAGAATACGTGGCACAGAC  
177 TACCAGCGATGCGATTTTAAAGAACATTTAATGGTTTGAAAAAATCATA  
178 GAAATTATAGAACGAGTAGTAAATTCATAATTACTAGAAAAAGATTCA  
179 CACCGACTTGAGCCATTTG  
180 CTCATTCAGTGAATAAGGCTTGCATATGCGTTATACAAATTC  
181 ATTTTCATCTTCTGACCTAATGGCTCATTATACCAGTCAGGAC  
182 GGTCTGAGAGACTACCTTTTTAA  
183 GAAGAGTCCGATAGCTTAGATTAATTAATTTTTGTTAAACTGATAGC  
184 AAAGGGTGTATGATATTCAACCGTTTGTAAACGTTAATATCCGAACGA  
185 TGTAGGTAAAGCCTGTTTAGTATCCCTGACGA  
186 TTAAATGCAATGCCTGAGTAATG  
187 GTCGCTATTAATTAATTTT  
188 CCCTTAGACCAATAGGAACGCCATCAAAAAT  
189 AAACATAGAATAGTGAATTTATCATACCGACCGTGTGATACATTGTGA  
190 ACCATCAAAGAAAGGCCGGAGACAAGAATAAACACCGGAATGGGCTTG  
191 ATAAATTAATGCCGGAGAG  
192 GATTGTATAAGCAAATATTTAAATCTAGCTG  
193 TATTTTTGAATGGCTATTAGCTGGTTTGCCCCAG  
194 CCTAAAACTGGCCCTGAGAGAGTTGCAGCAAG  
195 ACCACCAGAGACGGGCAACAGCTGATTGCCCT  
196 CGGTCCACGTCTTTAATGCGCGAATCAGCTCATTTTTTAAATCCTTGA  
197 TCACCGCCATCGCCATTA AAAATATTTGTTAAAATTCGCAGTCAAATC

198 TTCTTTTCACCAGTGCAGAAGATAAAAACAGAGGT

**S8. Modified staples and bridges for hexagonal origami staple based super-structures.**

**Modified staples**

11302;CGGCTACAGAGGCTTTGAGGACTAAAGTTTATCAGCTTGCTTTGAACCAA

11303;GGTCGGCACCTTTAATTGTATCGGACTTTTTTC

11306;TAAGAAACCAGCCTTTACAGAGAGATAATTTTTTTCACGTTCTGATTAG

11307;ATCCATCTAAAGGAATTGCGAATAAATAACAT

11310;ACAACCTTTCAACAGTTAACCGT

11402;TCAGAGGGTAATTGAGCGCTAATATCATAGTAAATGAATTTTCATGTAGCT

11403;CAGGTGCCCTCGTCTTTCCAGACGTGAGAGATA

11406;GCAAAGAAACAATGAAATAGCAAGCATTCCACAGACAGCCTTATCAG

11407;ATGGCGAGAACTACAACGCCTGTATAGCTATC

11410;CCAATAGGAACCCATAGCAGAAA

12302;CGGCTACAGAGGCTTTGAGGACTAAAGTTTATCAGCTTGCTTTATAGTGTT

12303;GGGAGCACCTTTAATTGTATCGGACTTTTTTC

12306;TAAGAAACCAGCCTTTACAGAGAGATAATTTTTTTCACGTTTCTCAGTA

12307;CACGAACGAAAGGAATTGCGAATAAATAACAT

12310;ACAACCTTTCAACAGATCACCAT

12402;TCAGAGGGTAATTGAGCGCTAATATCATAGTAAATGAATTTTCAAAGACAG

12403;TTGATGCGTCGTCTTTCCAGACGTGAGAGATA

12406;GCAAAGAAACAATGAAATAGCAAGCATTCCACAGACAGCCAGGGTTA

12407;GAATGGCAAACCTACAACGCCTGTATAGCTATC

12410;CCAATAGGAACCCATATTGTTAT

12502;AAGGAAACCGAGGAAACGCAATAATAAGAGCCACCACCCTCATCCACCGGA

12503;CCTCCAAAAGAACCGCCACCCTCACGGAATAC

12506;TTCATCAGATGTTAGCAAACGTAGACCGTACTCAGGAGGTAAGCAATA

12507;CAAACATAACCGGAATAGGTGTATCAAATACA

12510;AGTACCAGGCGGATAATCTCTTT

12602;TATTTTGTCACAATCAATAGAAAATTCAAGAGAAGGATTAGGACGCGGCAT

12603;TAGACCAAGAGGCTGAGACTCCTCATATGGTT

12606;AGATGGTTAGGGAGGGAAGGTAAACCCCCTGCCTATTTTCGCGTACGGG

12607;CACACAGTGTATAAACAGTTAATGTATTGACG

12610;ACTGGTAATAAGTTTCCATTCAA

13402;TCAGAGGGTAATTGAGCGCTAATATCATAGTAAATGAATTTTTCGGTCAACG

13403;TCCGCATATCGTCTTTCCAGACGTGAGAGATA

13406;GCAAAGAAACAATGAAATAGCAAGCATTCCACAGACAGCAGCTGTAC

13407;AAAATACTAACTACAACGCCTGTATAGCTATC

13410;CCAATAGGAACCCATCGACCCTC

13502;AAGGAAACCGAGGAAACGCAATAATAAGAGCCACCACCCTCATCACGAAAA

13503;TGGGATTAAGAACCGCCACCCTCACGGAATAC

13506;TTCATCAGATGTTAGCAAACGTAGACCGTACTCAGGAGGTCGTGAGAG

13507;CCAACCATCCGGAATAGGTGTATCAAATACA

13510;AGTACCAGGCGGATACGCTGAAT

13602;TATTTTGT CACAATCAATAGAAAATTCAAGAGAAGGATTAGGATGGAGGCC  
13603;ACTCATCCGAGGCTGAGACTCCTCATATGGTT  
13606;AGATGGTTAGGGAGGGAAGGTAAACCCCCTGCCTATTTTCGATCGCGAA  
13607;TTCAGCAGGTATAAACAGTTAATGTATTGACG  
13610;ACTGGTAATAAGTTTTTCGTTCTC

21102;AATTAGAGCCAGCAAATCACCAGTAGCGTCATACATGGCTTTCTTCGGCG  
21103;AATCTTTTTTACCGTTCCAGTAAGCACCATTA  
21106;GCGCATAGTAGCAGCACCGTAATCACAAATAAATCCTCATGGCAGATT  
21107;TTAAATTTGCCTTGATATTCACAAAGTAGCGA  
21110;GAGCCGCCGCCAGCAACTGGAAA  
21202;TCGGTCATAGCCCCCTTATTAGCGTTTCCACCCTCAGAGCCGCAAGTACGC  
21203;AGAAGGCGGCCACCCTCAGAGCCAGCCATCTT  
21206;GATTTGTATTGCAGGGAGTTAAAGATTCGGTCGCTGAGGCTGATAAGC  
21207;GGCGCATACACGCATAACCGATATGCCGCTTT  
21210;ACAGCTTGATACCGATCTTAGAC  
21302;CGGCTACAGAGGCTTTGAGGACTAAAGTTTATCAGCTTGCTTTCATAGAAA  
21303;GTTGCCATCCTTTAATTGTATCGGACTTTTTTC  
21306;TAAGAAACCAGCCTTTACAGAGAGATAATTTTTTTCACGTTGTCAAAGC  
21307;TACTGAATAAAGGAATTGCGAATAAATAACAT  
21310;ACAACCTTTCAACAGGCGCAAGA  
21402;TCAGAGGGTAATTGAGCGCTAATATCATAGTAAATGAATTTTCAAAGAAAC  
21403;ATAGGTCTTCGTCTTTCCAGACGTGAGAGATA  
21406;GCAAAGAAACAATGAAATAGCAAGCATTCCACAGACAGCGTTTGGTC  
21407;TAGCCAGAACTACAACGCCTGTATAGCTATC  
21410;CCAATAGGAACCCATGACGGTTG

22102;AATTAGAGCCAGCAAATCACCAGTAGCGTCATACATGGCTTTCTTCAAG  
22103;TTAGCCATTTACCGTTCCAGTAAGCACCATTA  
22106;GCGCATAGTAGCAGCACCGTAATCACAAATAAATCCTCATGGGATTGA  
22107;CACAAGCCGCCTTGATATTCACAAAGTAGCGA  
22110;GAGCCGCCGCCAGCAAAGTCAA  
22202;TCGGTCATAGCCCCCTTATTAGCGTTTCCACCCTCAGAGCCGCTAATAAGA  
22203;CCTCCAAGGCCACCCTCAGAGCCAGCCATCTT  
22206;GATTTGTATTGCAGGGAGTTAAAGATTCGGTCGCTGAGGCGTGTCAAT  
22207;TAGACAAACACGCATAACCGATATGCCGCTTT  
22210;ACAGCTTGATACCGACCAGAAAT  
22302;CGGCTACAGAGGCTTTGAGGACTAAAGTTTATCAGCTTGCTTTTCAATACC  
22303;ACACCAGACCTTTAATTGTATCGGACTTTTTTC  
22306;TAAGAAACCAGCCTTTACAGAGAGATAATTTTTTTCACGTTTTGCAGTA  
22307;AGCCATACAAAGGAATTGCGAATAAATAACAT  
22310;ACAACCTTTCAACAGAACCTCAG  
22402;TCAGAGGGTAATTGAGCGCTAATATCATAGTAAATGAATTTTCATTTGGTC  
22403;CCAGCCGTTTCGTCTTTCCAGACGTGAGAGATA  
22406;GCAAAGAAACAATGAAATAGCAAGCATTCCACAGACAGCCGGAAACC

22407;GATTGGTGAACACTACAACGCCTGTATAGCTATC  
22410;CCAATAGGAACCCATCTCCTTCT  
22502;AAGGAAACCGAGGAAACGCAATAATAAGAGCCACCACCCTCATGCATATAC  
22503;TGGCGTGAAGAACCGCCACCCTCACGGAATAC  
22506;TTCATCAGATGTTAGCAAACGTAGACCGTACTCAGGAGGTGAGTCTCA  
22507;TCTCTTTCCCGGAATAGGTGTATCAAATACA  
22510;AGTACCAGGCGGATATTGATTCT  
22602;TATTTTGTCACAATCAATAGAAAATTCAAGAGAAGGATTAGGAGAGGAAGC  
22603;TCCAAGCGAGGCTGAGACTCCTCATATGGTT  
22606;AGATGGTTAGGGAGGGAAGGTAAACCCCCTGCCTATTTTCGCACGAGTA  
22607;CGGCAGACGTATAAACAGTTAATGTATTGACG  
22610;ACTGGTAATAAGTTTATCAGAAA

23402;TCAGAGGGTAATTGAGCGCTAATATCATAGTAAATGAATTTTCATTTAATT  
23403;TAATTCCTTCGTCTTTCCAGACGTGAGAGATA  
23406;GCAAAGAAACAATGAAATAGCAAGCATTCCACAGACAGCAATATCCG  
23407;CGTCATGGAACACTACAACGCCTGTATAGCTATC  
23410;CCAATAGGAACCCATATCATTTT  
23502;AAGGAAACCGAGGAAACGCAATAATAAGAGCCACCACCCTCATGATTTGTC  
23503;CCAAAACGAGAACCGCCACCCTCACGGAATAC  
23506;TTCATCAGATGTTAGCAAACGTAGACCGTACTCAGGAGGTCATCTCTC  
23507;CAATATCTCCGGAATAGGTGTATCAAATACA  
23510;AGTACCAGGCGGATAGTAAGTTG  
23602;TATTTTGTCACAATCAATAGAAAATTCAAGAGAAGGATTAGGATCATTGTG  
23603;AGTTGCGGGAGGCTGAGACTCCTCATATGGTT  
23606;AGATGGTTAGGGAGGGAAGGTAAACCCCCTGCCTATTTTCGTAGCGACA  
23607;GTTGTTCCGTATAAACAGTTAATGTATTGACG  
23610;ACTGGTAATAAGTTTTCCATATC  
23102;AATTAGAGCCAGCAAATCACCAGTAGCGTCATACATGGCTTTCATAGAAA  
23103;TGGTAGCTTTACCGTTCCAGTAAGCACCATTA  
23106;GCGCATAGTAGCAGCACCGTAATCACAATAAATCCTCATCAACCAAC  
23107;GTCCTGCGGCCTTGATATTCACAAAGTAGCGA  
23110;GAGCCGCCGCCAGCATAAGGCCA

31102;AATTAGAGCCAGCAAATCACCAGTAGCGTCATACATGGCTTTCATGAAGT  
31103;AGTATGCATTACCGTTCCAGTAAGCACCATTA  
31106;GCGCATAGTAGCAGCACCGTAATCACAATAAATCCTCATTCAATAGA  
31107;ATTTGGCGGCCTTGATATTCACAAAGTAGCGA  
31110;GAGCCGCCGCCAGCATCCAAATG  
31202;TCGGTCATAGCCCCCTTATTAGCGTTTCCACCCTCAGAGCCGCATAACGAG  
31203;CTCATTAGGCCACCCTCAGAGCCAGCCATCTT  
31206;GATTTGTATTGCAGGGAGTTAAAGATTCGGTTCGCTGAGGCGCTTTAAA  
31207;TTCAAATACACGCATAACCGATATGCCGCTTT  
31210;ACAGCTTGATACCGATATCAGGG  
31302;CGGCTACAGAGGCTTTGAGGACTAAAGTTTATCAGCTTGCTTTGTCAATAT



31303;AGTCGGGACCTTTAATTGTATCGGACTTTTTTC  
31306;TAAGAAACCAGCCTTTACAGAGAGATAATTTTTTTCACGTTTTAATCCA  
31307;TGACGATGAAAGGAATTGCGAATAAATAACAT  
31310;ACAACCTTTCAACAGAGTCAATA  
  
32602;TATTTTGT CACAATCAATAGAAAATTCAAGAGAAGGATTAGGACAACGGCG  
32603;CGCCAGCGGAGGCTGAGACTCCTCATATGGTT  
32606;AGATGGTTAGGGAGGGAAGGTAAACCCCCTGCCTATTTTCGACCAATCT  
32607;AAGATGGGGTATAAACAGTTAATGTATTGACG  
32610;ACTGGTAATAAGTTTTGAATATT  
32102;AATTAGAGCCAGCAAATCACCAGTAGCGTCATACATGGCTTTGCCGAAGC  
32103;GTTGACCATTACCGTTCCAGTAAGCACCATTA  
32106;GCGCATAGTAGCAGCACCGTAATCACAAATAAATCCTCATGCCTTTAG  
32107;CGGACGACGCCTTGATATTCACAAAGTAGCGA  
32110;GAGCCGCCGCCAGCAGACATTAC  
32202;TCGGTCATAGCCCCCTTATTAGCGTTTCCACCCTCAGAGCCGCACGCACGT  
32203;AAGAACGTGCCACCCTCAGAGCCAGCCATCTT  
32206;GATTTGTATTGCAGGGAGTTAAAGATTCGGTCGCTGAGGCGCGAACAA  
32207;GGACGCTCCACGCATAACCGATATGCCGCTTT  
32210;ACAGCTTGATACCGACGCCTTCC  
32302;CGGCTACAGAGGCTTTGAGGACTAAAGTTTATCAGCTTGCTTTGACGGGAT  
32303;GACGGCAGCCTTTAATTGTATCGGACTTTTTTC  
32306;TAAGAAACCAGCCTTTACAGAGAGATAATTTTTTTCACGTTTATCCCAC  
32307;TAAACGCAAAGGAATTGCGAATAAATAACAT  
32310;ACAACCTTTCAACAGCAGTAGCA

33602;TATTTTGT CACAATCAATAGAAAATTCAAGAGAAGGATTAGGAGGCAGAAG  
33603;AGAGGCCAGAGGCTGAGACTCCTCATATGGTT  
33606;AGATGGTTAGGGAGGGAAGGTAAACCCCCTGCCTATTTTCGACTTGACT  
33607;TTAGTGGTGTATAAACAGTTAATGTATTGACG  
33610;ACTGGTAATAAGTTTCTCTTTTA  
33102;AATTAGAGCCAGCAAATCACCAGTAGCGTCATACATGGCTTTTGAACAAA  
33103;AACCAGTCTTACCGTTCCAGTAAGCACCATTA  
33106;GCGCATAGTAGCAGCACCGTAATCACAAATAAATCCTCATTCTCCTCA  
33107;TTGACAGAGCCTTGATATTCACAAAGTAGCGA  
33110;GAGCCGCCGCCAGCAAGAGCTTC

**Bridges**

1101;CCCCTCAGCGGCAAACGCTTCGCTTGGTCAA  
1102;ACCTACCGATTAATAATTTTTACCG  
1103;TTATAACCCATGATTAAACTCCTA  
1104;AAATAAAAGTCTGAAATCACACTC  
1105;ATCACGAAGTCATGATTTTGAATT  
1106;AAAAAAAGTGAATCGCGAGTGGTC  
1107;GCGATAAACAGAAGTGAGAACCAG  
1108;GAAGAAGCTGGAGTAACGGTCACA

1109;AACCTGACTATTCCACCTGTAAAA  
1110;TTAGGTGTTGCAACAACCTGAACGG  
1111;CACTGGTCAAATATAACGTTGACG

2201;AATAACCTAATCATGGTGGCGAAT  
2202;GTTCTTGCTGGCTGGAGACAAATA  
2203;AATCACCTCACTTAAGAAATCACC  
2204;GTTCCCTGAATGAATGGAATAGCAC  
2205;CCGCCAGCGAAGCCTTCAAGAAGG  
2206;AGGAGAAACCACCAGCAAGAGCAG  
2207;CAATTTAGACATGGCGCATACGAA  
2208;ACGATACCACTGACCCTTTGACCG  
2209;GGCGGCTTTCAGCAATCTTAAACT  
2210;GAATCACCCACATCACCTTGAATG

2301;CGGCAGAAAACGGAAAACATCCTT  
2302;TTTCACGCCCAAATCAAGCAACTT  
2303;TTGCCACCAAGTCCAAGGCGGCAA  
2304;ACAAAACAGGGTTCGCCTTTATCAG  
2305;TCCTTTCCAGCAATATCGGTATAA  
2306;ACCTTTAGGCAGCAGCAAGATAAT  
2307;ATTAAGCTCAGGAAATCGTTAAGG  
2308;CTCTTTAGTCGCAGTACAGCACGC  
2309;ATCAGCACGGCGGAAAACGAACAA  
2310;GTAAACATGTCAACCATAACCAGCA

1201;TTTTTGAGTGCCATGCTCAGGAAC  
1202;GCGGCACAGGAGGAAGCGGAGCAG  
1203;AGAAAGCTCAGTCTCAGAATGTTT  
1204;GTTGAACACGACCAGAAAGTCGTC  
1205;TGTGGTAGAAACTGGCCTAACGAC  
1206;AGTTCCATTTGCAGACCCATAATG  
1207;AATTAGCATAAGCAGCCAACATCA  
1208;TGCCCAGAGATTAGAGTCTTGGTC  
1209;AATCACGTCGCATGACAAGTAAAG  
1210;TCAGCGTCCATCATGGTAACGCTG  
1211;CCAAATGAAGAAATAAATAAGAGGTTTTACCT

2401;CAAATCCGGGCAGCAACGGAAACC  
2402;CATCATCTTTTTAGTAAGCTCTTT  
2403;TGATTGTCCAGTTGCATGATTAAG  
2404;GGTTAGCCTCGGTACGCTCGGCAA  
2405;TTTTGCATGTCAGGCATCCACGGC  
2406;ATAGTTGTCCAGCAATCTCTTTTT  
2407;AGTCGCCGACTGAATGTATAGATA  
2408;ACCCTGAAACAAATGCTCGTATTC

2409;CTGGTCTTTTAGGGATTTTATTGG  
2410;TTAATCGTAAGCATCTCATTTTGT

2501;AGACATAACAAGAAAAGCGGCATG  
2502;AACCAGTAACGCTCGGCGCCAGTT  
2503;AAAGGTCATGCGGCATGTGTTAAC  
2504;GAGGAGTGGCATTAAACAGGAAGCC  
2505;GACCAGCAACCATCCTTCATGAAC  
2506;CTGTTCACAAATGGTAATAAGACG  
2507;ATAACCGGAGTAGTTGCATAAACG  
2508;AGGGACATAAAAAGTAGAAGGAGT  
2509;TCCATCTCAAAATGTCTACAGTAG  
2510;GCAAGGCCGAAAGACGGAGAGCGC

3201;GTTGATAATATCCTCAAGTAAGGG  
3202;CCCTGCAACAACGCGAGCAGTAGA  
3203;TTTTCCATAATAGACGTTAAAATT  
3204;CCTACATACCAAAGACCTTGGAAA  
3205;TGCTGTTGGAGCGCCTTTACGCTT  
3206;TACCTCGCATTTGGCGCATAATCT  
3207;TTGAGCTTGAGTAAGCAACGGCTG  
3208;CAGGGCGAGCGCCAGAAATACTGA  
3209;ATTGGTAAACGTTTTTTACCTTTA  
3210;ATCACTCCGCGAGTCATTTCTTTG

4401;GATTAAGCCCGCACGTAATTTTTG  
4402;TTTCTTCTGTCGTAACCCAGCTTG  
4403;GGTTGAACGGCGTCGCGCGTCAGT  
4404;CAGTGTTTCCTGCGCGTTCTGCTT  
4405;TTTTTGCGTACACGCAAGGTAAAC  
4406;TTCAGCGGTTCCAGCCTCAATCT  
4407;TCGGCTACAGTAACTTCTTTAAC  
4408;GACGCCATTAATAATGTTGCGCCG  
4409;GTCACAGGTTTTCCGTAAATTCAG  
4410;ATGATGAGCGCATAAATTTGAGCA

4501;AAATGTCAAGGCCGTTTGAATGTT  
4502;GAACATAACAGATAGTAATCCACG  
4503;TGAACAGCATCGGACTTAAGCAAT  
4504;CAATAAACTCAACAGGCTTACCTA  
4505;CATGATTTAGCAGGAAAGCGAGGG  
4506;AAAGTCCATACGGATTGTTTCAGTA  
4507;AAGCGGTCTGGAAACGGCGTACCA  
4508;AGCCTCAACGCAGCGAAGCTTAAT  
4509;CCTGAATGCGAGCACGAGAGCGGT  
4510;ATCCAAACCGGTTAAATCCAAAAC

4511;AAATCGAAATCATCTTTTTGTTACTCGTCAGA

5201;TATCGAAGAAGAGAATCTCTACCA  
5202;ATGTGACTCAGGTTGGATACGCCA  
5203;AAGCGATAAAACTCTGCATATCTA  
5204;CTTGACGAACGTGCCAAACTTCTG  
5205;AAAGTGTTAGCATATTAAGCCACT  
5206;TCCAACGCTTTTCGACTCATCAGA  
5207;GCTTTATCAAGATAATGTCAGTTT  
5208;ATCGTTAGTTGATGGCAGCAGTAG  
5209;CGTAAACAGAAAGGTCGCAAAGTA  
5210;TCGAGCTGCCAGCAGTCCACTTCG  
5211;ATTTTCTCATTTTCCGCGCAAGGATAGGTCGA

4301;CACTAACCTCCGTGGACAGATTTG  
4302;AGCATTTTGCTGATGAACTAAGTC  
4303;CGCTGATTCTGCGTTTCATCCCGA  
4304;CTCATTCTGATTCTGAATGAGAAG  
4305;GCGCCAATACAGCTTCTTGGGAAG  
4306;GCTTGGTTACATTAGAAATATCCT  
4307;AGCAGCATCAGTGACGTTTAGTGA  
4308;ATTCTTTAGCTCCTAGTATCAACC  
4309;ATGAAAAAACCTTTAGCAGCAAGG  
4310;TGACTTTTATCGGCAACAGCTTTA

5101;GGCAGCAATTAACGTATTTAGCCA  
5102;CCAACAGCTGAATCATTAGCCTTG  
5103;GATAGCAGTCGGCGTGCATATAAC  
5104;TTAAGCGGCTCACCTTGGCACACA  
5105;CATACTCATAGCATCAACAGGCCA  
5106;CAGAACGTAATGAAGACGGCCATT  
5107;AAGTGCACCGCATGGAGAAAAAGC  
5108;TGTAGCGAACTGCGATAGGAAGTG  
5109;CTACCTGTGGGCATACTGTAACCA  
5110;CGTATTTTTCGACGACCAAATTAG  
5111;GCGGCGATTGCGTACCGCAAGCTATTTAACTG

4201;TGTTCCAAACCATACGACCAATAT  
4202;TAGTCACGCAGCTTTACCGTCTTT  
4203;TTAGAGCCAATAACCATCAAAGCAT  
4204;TCATAAAACGCCTCTATTATTTCC  
4205;CCTGACGGATCGGTCGTCAGCCAA  
4206;TGTCAAAAACATACAATTGGGAGG  
4207;ATTTGGAGGCATGAAAACGATAAA  
4208;CAGCATGAGCCTGTCGTAAAAAAG  
4209;ACGAACCACATTGCATTCATCAAA

4210;AGCAAAGCGTGACATTCAGAAGGG

4101;TATCGAACCTACGCGATTTTCATAG  
4102;TCCAGCAAGGCCGTCAACATACAT  
4103;TCAGAAGCAGCCTTATTCTTGAAC  
4104;TTAATACCTTTCTTTTAAACTCAT  
4105;ACAGATACTGGGGTAATTATACTC  
4106;TATCCTTAAATTCATCCATTAECT  
4107;ATTGTAGCATTGTGCCAGAGGGCG  
4108;CCAGCTTGCGGCAAAACAAGTTGG  
4109;ATTAATATCTGCGTAACCGTCTTC  
4110;TAAAACCTTCGGGGCGGTGGTCT

3101;AATAATCAAACGCCCTGCATACGA  
3102;AATCTCTTGAGCCTCGATACGCTC  
3103;TCAATAGCAGGTTTAACCAAGAGC  
3104;GTTATCCATCTGCTTAAGAAATGC  
3105;GAAAGAGTTGGAAGCCAAGCATTG  
3106;GGAACATTCTAGGGGCGGCCTCAT  
3107;AGCACCAGAAACAAAAAGAGCCTT  
3108;GATTTAATACCAGCATTACCAGCT  
3109;AAGTCCTTCACCCATGCCTACAGT  
3110;CGGTAGCAGCCAGCCTGCAACGTA

2101;CAAACCTATTTTCAGCGAAACCAATC  
2102;TTAGTAGCACCACCATTACCAGCA  
2103;GAATGCAATGAAGAAAGGTAAAGT  
2104;ACCATGAAACCAACATACAGATGT  
2105;CGGCGTTGAAACGTTATTGCCCGG  
2106;GAAGGACGCACCAACAGAAACAAC  
2107;TCAAAAGCAATATCAGTCAATAGT  
2108;CCTTGACGGTATAATAAAATTTAG  
2109;CAGGCAAACACCACCATCATGGCGA  
2110;AGGATAAAGAAGAAGACTCAAAGC  
2111;GAGGGTAGTCGGAACCCATCATAGGCAGTCGG

**Table S9. Unmodified diamond shaped DNA origami staples**

- 1 CCAATTCTGCGAACG
- 2 CTGGAAGTTTCATTCCTAAAATGT
- 3 CATGTTTTAAATATGCGCGGAATC
- 4 GCTTAATTGCTGAATACTCAAATG
- 5 TGATAAGAGGTCATTTATGACCATAAATCAAAAA
- 6 TTTAATTGCTCCTTT
- 7 AAGAAGTTTTGCCAGAGGGGGTAATAGATATAACAGTTGATTC
- 8 CACGTTGGGATAGCGTCCAATACTAACTAAAGTACGGTGT

9 ACAAACGGTATTCATTGAATCCCCTAATGCTGTAGCTCAA  
1  
0 ACATTAAATGTGAGCGAGTAAAGTTCAGAAAACGAGATTGCGGATGGCTTAGA  
1  
1 CAGGATTAGAGAGTA  
1  
2 GCGAACCAGACCGGAAGAAGCAAA  
1  
3 TTCAAATATCGCGTTTAGGAAGCC  
1  
4 AATATGATATTCAACCAGCTATTT  
1  
5 TGAGAAAGGCCGGAGAGGTCATTGCCTGAGAGTC  
1  
6 AAAGATTCAAAGGG  
1  
7 AGGTCTTTACCCTGACTATTATAGTCAGCAAACCTCCAACAGGT  
1  
8 GCCATCAACATCAAAAAGATTAAGTAATTCGAGCTTCAA  
1  
9 TTAAATCATAATGCCGGAGAGGGTGTTCTAGCTGATAAAT  
2  
0 AATTGTAACGTTAATATTTTTCTACAAAGGCTATCACAGTCAAATCACCATC  
2  
1 CTGAGTAATGTGTAG  
2  
2 TTTAGAACCCTCATATAATCGTAA  
2  
3 GAAGCCTTTATTTCAAATACCAGT  
2  
4 AAACATTATGACCCTGCGTTAATA  
2  
5 CTCAGAGCATAAAGCTTTACAGGTAGAAAGATTC  
2  
6 ATTAAGCAATAAAGC  
2  
7 GAGCAAACAAGAGAATCGATGAACGGTATTTTAAATGCAATGC  
2  
8 ATAATCAGTGTCAATCATATGTACCGCAAGGATAAAAATT  
2  
9 TGCGATTTTGGGAAGAAAATCTATAATACTTTTGCGGGA  
3  
0 CTTGAGATGGTTTAATTTCAATAACGGAACAACATTAATAATCGGTTGTACCAA  
3  
1 GGCAAAGAATTAGCA  
3  
3 TAGCATTAAACATCCAAAATAATG

2  
3  
3 TGAAAAGGTGGCATCATACGAGGC  
3  
4 TGTTTAGCTATATTTCCCTCGTT  
3  
5 CATTAGATACATTTTCGATAGCGAGAGGCTTTTGC  
3  
6 TAGATTTAGTTTGAC  
3  
7 CAGTTGAGATTTAGGAATACCACATTCTAAATCATACAGGCAA  
3  
8 GAATAAGGTAACGCCAAAAGGAATATTCTACTAATAGTAG  
3  
9 CTTCCGGAGCAACACTATCATAACATTTGGGGCGCGAGC  
4 GGGACGACGACAGTATCGGCCGACGATAAAAACCAAACAATGGTCAATAAC  
0 C  
4  
1 TTAGACTGTGTAGATGGGCGCATCTGGGAAGGGCGATCGGAAAGGGGG  
4  
2 GTCATAAACGGATTGACCGTAATGCATTAAACGGGTAAAATTCATGAG  
4  
3 CTTTAAACCAACCCGTCGGATTCTGAAGGCACCAACCTAAAACGAAAG  
4  
4 ATTCAGGCTGCGCAACTGTGTAACCGTGCATCTGCCAGTTTG  
4  
5 ATGTGCTGAACCATCGCCACGCAGGTTCCACAGCATTTCAGAACGTGGA  
4  
6 GAAGTTTCTCGCTGAGGCTTGCAGTGCCCCAGCAGGCGAAGCGTA  
4  
7 ACAGAGGCTTTGAGGACTAAAGACTTTTACGTAATGCCACTACCCGTGGGA  
4  
8 ACAATGACAACCAAGGCGATTAAGTT  
4  
9 ATATTCGGATTACGCCAGCTGGCGTGCGGGCCTCTTCGCTGGATAGGT  
5  
0 GGAGTTAAAGGCCGC  
5  
1 GAGTCCACTATTAACGAAATCGGCAAATCCC  
5  
2 CCTGTAGACAGCCCTCATAGTTAAATCCTGTTTGATGGTTAACCGAT  
5  
3 GCGGATTGAAATAATTCGCGTCTGCACTCATCTTTGACCCAAAGACAG  
5  
4 CGAAAGACGCTCATTTTTAAACCAGCGCGAAACAAAGTACTGAGTGAG  
5 TTGAGAGAGTTAAAATTCGCATTAATCGCCTGATAAATTGTGTGCGAAA

5  
5  
6 GCAAAAGAATACTAAAGCCTTCCTGTAGCCAGCTTTCAT  
5  
7 CATCGGAAGTCACCCTCAGCAGCGGTTGCGTCGTCAGTACAACTACAA  
5  
8 CTAAGTACAGTCGGGAAACCTGTCTGATTGCCCTTCACCAAAT  
5  
9 ATAAAGTGTAAGCCTGGGGTGCCTAAAACGGAGATTTGTATCAATTTTGG  
6  
0 TTTGCGGGATCCGAGGGTAGCAACGG  
6  
1 CCGCTTTCATTAATTGCGTTGCGCCAGCGATTATACCAAATAGGAAC  
6  
2 CGTGCCAGCTGCATT  
6  
3 CGATCTAAAGTTTTAGCAAGCGGTCCACGCTG  
6  
4 TCGTCACCTTTCAGACGTTAGTGCCTGGCCCTGAGAGACTCACTGC  
6  
5 AACTAGCAAAAAGCCCCAAAACACTTAGCCGGAACGAGGCTCACAAT  
6  
6 CAGGACGTAAAGAACTGGCTCATTTAAGGGAACCGAACTGCATAGCTG  
6  
7 AAACGAACCTTTAATCATTGTGAAGACAGATGAACGGTGTACAGACCA  
6  
8 CGCGACCTGCTCCATGTTAGGAAGATTGTATAAGCAAATATT  
6  
9 TCCACACAAACGCGCGGGGAGAGGCTTTTATTTTACCGTAACACTGAG  
7  
0 TTTCTGTGAAAATCTCCAAAAAATAATTTTTTTCACGTTTCAGTT  
7  
1 TACCGAGCTCGAATTCGTAATCATGGTACCAACTTTGAAAGAGTTACCTTA  
7  
2 ATGAATCGGCCACATACGAGCCGGAA  
7  
3 GTATTGGGGTGAAATTGTTATCCGCGCAGACGGTCAATCACCCGGTTG  
7  
4 AAGGCTCCAAAAGGA  
7  
5 ATTTTCTGTATGGGCACCAGTGAGACGGGCAA  
7  
6 GTCTATCAGCTAAACAACCTTCAACGCCAGGGTGGTTTTTCGGTTTGC  
7  
7 CAGATACTTGGCCTGACGAGAATCATCAAGAGTAATCTATGCCTGC  
7 ATAGTAAGACGTAACAAAGCTGCTTTCATTACCAAATCACGTTGTAA



8  
7  
9 TACCAGACTCAGGAAGATCGCACTGGAAACCAGGCAAAGCGCCATTTCG  
8  
0 CGCATAGGCTGGCTGACCTACACCAGAACGAGTAGTAAATTG  
8  
1 AGGTCGACATCGGTTTATCAGCTTAGGAATAGAACAAAGGGCGAAAAAC  
8  
2 AACGACGGTCTTAAACAGCTTGATTAATCAAAGAATAGGAAC  
8  
3 GTAACGCCAGGGTTTTCCAGTCACGACACCGCTTCTGGTGCCCCAGCCAG  
8  
4 CCTTTAATTGTTCTAGAGGATCCCCG  
8  
5 GGTGAATTCCAGTGCCAAGCTTGCTGACAAGAACCGGATACATTCAGT  
8  
6 ACCGATAGTTGCGCC  
8  
7 CAGCGGAGTGAGAACAACACTAAAGGAATTGCGA  
8  
8 CCAACGTGTGTTGTTCCAGTTTGCCCGAGATAGGGTTGAGCTTTCGA

**Table S10. Modified staples and bridges for mixed super-structure**

**Modified staples for hexagonal DNA origami**

31H

31H602;TATTTTGTGACAATCAATAGAAAATTCAAGAGAAGGATTAGGACTTCGGCG

31H603;AATCTTTTGAGGCTGAGACTCCTCATATGGTT

31H606;AGATGGTTAGGGAGGGAAGGTAAACCCCTGCCTATTTGGGGCAGATT

31H607;TTAAATTTGTATAAACAGTTAATGTATTGACG

31H610;ACTGGTAATAAGTTTACTGGAAA

31H102;AATTAGAGCCAGCAAATCACCAGTAGCGTCATACATGGCTTTAAGTACGC

31H103;AGAAGGCGTTACCGTTCAGTAAGCACCATTA

31H106;GCGCATAGTAGCAGCACCGTAATCACAAATAAATCCTCATTGATAAGC

31H107;GGCGCATAGCCTTGATATTCACAAAGTAGCGA

31H110;GAGCCGCCGCCAGCATCTTAGAC

31H202;TCGGTCATAGCCCCCTTATTAGCGTTTCCACCCTCAGAGCCGCCATAGAAA

31H203;GTTGCCATGCCACCCTCAGAGCCAGCCATCTT

31H206;GATTTGTATTGCAGGGAGTTAAAGATTCGGTTCGCTGAGGCGTCAAAGC

31H207;TACTGAATCACGCATAACCGATATGCCGCTTT

31H210;ACAGCTTGATAACCGAGCGCAAGA

32

32H502;AAGGAAACCGAGGAAACGCAATAATAAGAGCCACCACCCTCATCTGTTGAA

32H503;GCCTAACGAGAACCGCCACCCTCACGGAATAC  
32H506;TTCATCAGATGTTAGCAAACGTAGACCGTACTCAGGAGGTGATGCCCA  
32H507;ACAAGTAACCGGAATAGGTGTATCAAAATACA  
32H510;AGTACCAGGCGGATACTCCAAAT

32H602;TATTTTGTGACAATCAATAGAAAATTCAAGAGAAGGATTAGGACATGAAGT  
32H603;AGTATGCAGAGGCTGAGACTCCTCATATGGTT  
32H606;AGATGGTTAGGGAGGGAAGGTAAACCCCTGCCTATTTTCGTCAATAGA  
32H607;ATTTGGCGGTATAAACAGTTAATGTATTGACG  
32H610;ACTGGTAATAAGTTTTCCAAATG

32H102;AATTAGAGCCAGCAAAATCACCAGTAGCGTCATACATGGCTTTATAACGAG  
32H103;CTCATTAGTTACCGTTCCAGTAAGCACCATTA  
32H106;GCGCATAGTAGCAGCACCGTAATCACAAATAAATCCTCATGCTTTAAA  
32H107;TTCAAATAGCCTTGATATTCACAAAGTAGCGA  
32H110;GAGCCGCCGCCAGCATATCAGGG

32H202;TCGGTCATAGCCCCCTTATTAGCGTTTCCACCCTCAGAGCCGCGTCAATAT  
32H203;AGTCGGGAGCCACCCTCAGAGCCAGCCATCTT  
32H206;GATTTGTATTGCAGGGAGTTAAAGATTCGGTTCGCTGAGGCTTAATCCA  
32H207;TGACGATGCACGCATAACCGATATGCCGCTTT  
32H210;ACAGCTTGATACCGAAGTCAATA

33

33H502;AAGGAAACCGAGGAAACGCAATAATAAGAGCCACCACCCTCATAGACGGA  
G  
33H503;ATCTCGAAAGAACCGCCACCCTCACGGAATAC  
33H506;TTCATCAGATGTTAGCAAACGTAGACCGTACTCAGGAGGTTGGTAATA  
33H507;CAGCAAGGCCGGAATAGGTGTATCAAAATACA  
33H510;AGTACCAGGCGGATACTCGGCGC

33H602;TATTTTGTGACAATCAATAGAAAATTCAAGAGAAGGATTAGGACCTCAAGT  
33H603;TGCAATTAGAGGCTGAGACTCCTCATATGGTT  
33H606;AGATGGTTAGGGAGGGAAGGTAAACCCCTGCCTATTTTCGCGCCTTTA  
33H607;CTCGCAACGTATAAACAGTTAATGTATTGACG  
33H610;ACTGGTAATAAGTTTTTTTTTAC

33H102;AATTAGAGCCAGCAAAATCACCAGTAGCGTCATACATGGCTTTCACGTAAT  
33H103;CTTCTGCGTTACCGTTCCAGTAAGCACCATTA  
33H106;GCGCATAGTAGCAGCACCGTAATCACAAATAAATCCTCATACGCAAGG  
33H107;AGCGGCTTGCCCTTGATATTCACAAAGTAGCGA  
33H110;GAGCCGCCGCCAGCATCCGTAAA

13H

13H302;CGGCTACAGAGGCTTTGAGGACTAAAGTTTATCAGCTTGCTTTCATAGAAA  
13H303;TGGTAGCTCCTTTAATTGTATCGGACTTTTTTC  
13H306;TAAGAAACCAGCCTTTACAGAGAGATAATTTTTTTCACGTTCAACCAAC  
13H307;GTCCTGCGAAAGGAATTGCGAATAAATAACAT  
13H310;AACAACCTTCAACAGTAAGGCCA

13H402;TCAGAGGGTAATTGAGCGCTAATATCATAGTAAATGAATTTTCGGCGATTG  
13H403;AATTAGGGTCGTCTTTCCAGACGTGAGAGATA  
13H406;GCAAAAGAAACAATGAAATAGCAAGCATTCCACAGACAGCGTGCACCG  
13H407;GCCATTAGAACTACAACGCCTGTATAGCTATC  
13H410;CCAATAGGAACCCATTAGCAGTC

13H502;AAGGAAACCGAGGAAACGCAATAATAAGAGCCACCACCCTCATCCTCGGCA  
13H503;CAATATCAAGAACCGCCACCCTCACGGAATAC  
13H506;TTCATCAGATGTTAGCAAACGTAGACCGTACTCAGGAGGTATAAAACG  
13H507;AGCCAACGCCGGAATAGGTGTATCAAAATACA  
13H510;AGTACCAGGCGGATAGCATGAGC

12H

12H202;TCGGTCATAGCCCCCTTATTAGCGTTTCCACCCTCAGAGCCGCTGGAGGCC  
12H203;ACTCATCCGCCACCCTCAGAGCCAGCCATCTT  
12H206;GATTTGTATTGCAGGGAGTTAAAGATTCGGTCGCTGAGGCATCGCGAA  
12H207;TTCAGCAGCACGCATAACCGATATGCCGCTTT  
12H210;ACAGCTTGATACCGATCGTTCTC

12H302;CGGCTACAGAGGCTTTGAGGACTAAAGTTTATCAGCTTGCTTTGGCGGTGG  
12H303;TATCAAGTCCTTTAATTGTATCGGACTTTTTTC  
12H306;TAAGAAACCAGCCTTTACAGAGAGATAATTTTTTTCACGTTATCCATTA  
12H307;TACAACTAAAGGAATTGCGAATAAATAACAT  
12H310;AACAACCTTCAACAGTCAACATA

12H402;TCAGAGGGTAATTGAGCGCTAATATCATAGTAAATGAATTTTCCCTGCATA  
12H403;CTTCCAAGTCGTCTTTCCAGACGTGAGAGATA  
12H406;GCAAAAGAAACAATGAAATAGCAAGCATTCCACAGACAGCGCCAAGCA  
12H407;AGTAGAAAACTACAACGCCTGTATAGCTATC  
12H410;CCAATAGGAACCCATTTCGATACG

12H502;AAGGAAACCGAGGAAACGCAATAATAAGAGCCACCACCCTCATATTCAGAA  
12H503;CCATAAAAAGAACCGCCACCCTCACGGAATAC  
12H506;TTCATCAGATGTTAGCAAACGTAGACCGTACTCAGGAGGTCAATTGGG  
12H507;CGGTTATTCCGGAATAGGTGTATCAAAATACA  
12H510;AGTACCAGGCGGATATTACCGTC

11H

11H202;TCGGTCATAGCCCCCTTATTAGCGTTTCCACCCTCAGAGCCGCGGCAACAG  
11H203;AAAAATATGCCACCCTCAGAGCCAGCCATCTT  
11H206;GATTTGTATTGCAGGGAGTTAAAGATTCGGTTCGCTGAGGCTTAGAAAT  
11H207;CCAATATGCACGCATAACCGATATGCCGCTTT  
11H210;ACAGCTTGATACCGAGATGAACT

11H302;CGGCTACAGAGGCTTTGAGGACTAAAGTTTATCAGCTTGCTTTAGTCATTT  
11H303;GGTAAAATCCTTTAATTGTATCGGACTTTTTTC  
11H306;TAAGAAACCAGCCTTTACAGAGAGATAATTTTTTTCACGTTTGCGCAT  
11H307;TGTTGCTTAAAGGAATTGCGAATAAATAACAT  
11H310;AACAACTTTCAACAGCGCGAGCA

11H402;TCAGAGGGTAATTGAGCGCTAATATCATAGTAAATGAATTTTCCATCTCAT  
11H403;GTCTTTCGTCGTCTTTCCAGACGTGAGAGATA  
11H406;GCAAAGAAACAATGAAATAGCAAGCATTCCACAGACAGCGCAATCTC  
11H407;TGCATCTCAACTACAACGCCTGTATAGCTATC  
11H410;CCAATAGGAACCCATTAGTAAGC

#### **Modified staples for diamond shaped DNA origami**

21P

21P302;GAGCAAACAAGAGAATCGATGAACGGTATTTTTAAATGCAATGCAGCACGCT  
21P303;AGGAAATGTTTAGAACCCCTCATATAATCGTAA  
21P306;TGCGATTTTGGGAAGAAAAATCTATAATACTTTTGCGGGATTATCAGC  
21P307;AGTCCAACAACATTATGACCCTGCGTTAATA  
21P310;ATTAAGCAATAAAGCTGCCAGCC

21P402;CAGTTGAGATTTAGGAATACCACATTCTAAATCATACAGGCAAATGTAGCT  
21P403;CAGGTGCCTAGCATTAAACATCCAAAATAATG  
21P406;CTTCCGGAGCAACACTATCATAACATTTGGGGCGCGAGCCTTATCAG  
21P407;ATGGCGAGTGTTTAGCTATATTTCCCTCGTT  
21P410;TAGATTTAGTTTGACAGCAGAAA

22P

22P202;AGGTCTTTACCCTGACTATTATAGTCAGCAAACCTCCAACAGGTAGCTTTAG  
22P203;AAAACCTAGGCGAACCAGACCGGAAGAAGCAA  
22P206;TTAAATCATAATGCCGGAGAGGGTGTTCTAGCTGATAAATCCTTGAAT  
22P207;GCATCACCAATATGATATTCAACCAGCTATTT  
22P210;AAAGATTCAAAGGGCATCACCT

22P302;GAGCAAACAAGAGAATCGATGAACGGTATTTTTAAATGCAATGCACCGCCTC  
22P303;GGCGCCACTTTAGAACCCCTCATATAATCGTAA  
22P306;TGCGATTTTGGGAAGAAAAATCTATAATACTTTTGCGGGAGCACCAAA  
22P307;TAAGTGGCAAACATTATGACCCTGCGTTAATA  
22P310;ATTAAGCAATAAAGCCAGCGAAA

22P402;CAGTTGAGATTTAGGAATACCACATTCTAAATCATACAGGCAAACCAAACC  
22P403;CGTTATTGTAGCATTAACATCCAAAATAATG  
22P406;CTTTCCGGAGCAAACTATCATAACATTTGGGGCGCGAGCACAGTCCT  
22P407;ACCATCATTGTTTAGCTATATTTCCCTCGTT  
22P410;TAGATTTAGTTTGACGTCGGGAG

22P102;AAGAAGTTTTGCCAGAGGGGGTAATAGATATAACAGTTGATTCAGCGAACC  
22P103;TAGGGTCGCTGGAAGTTTCATTCCTAAAATGT  
22P106;ACAAACGGTATTCATTGAATCCCCTAATGCTGTAGCTCAAACCTGAT  
22P107;TGTATCCAGCTTAATTGCTGAATACTCAAATG  
22P110;TTTAATTGCTCCTTTGCATTAAC

24P

24P102;AAGAAGTTTTGCCAGAGGGGGTAATAGATATAACAGTTGATTCAAGCAATG  
24P103;CAACAGGACTGGAAGTTTCATTCCTAAAATGT  
24P106;ACAAACGGTATTCATTGAATCCCCTAATGCTGTAGCTCAACGTACCAT  
24P107;GCAGCGACGCTTAATTGCTGAATACTCAAATG  
24P110;TTTAATTGCTCCTTTTGTACT

24P202;AGGTCTTTACCCTGACTATTATAGTCAGCAAACCTCCAACAGGTGTTGGATT  
24P203;GATTTGTCGCGAACCAGACCGGAAGAAGCAAA  
24P206;TTAAATCATAATGCCGGAGAGGGTGTCTAGCTGATAAATCATTCTGA  
24P207;GGGAAGTAAATATGATATTCAACCAGCTATTT  
24P210;AAAGATTCAAAAGGGTCTTTAGC

23P

23P402;CAGTTGAGATTTAGGAATACCACATTCTAAATCATACAGGCAAATCCAAA  
23P403;TGAGCTTATAGCATTAACATCCAAAATAATG  
23P406;CTTTCCGGAGCAAACTATCATAACATTTGGGGCGCGAGCTTGTTTCAG  
23P407;TTCTTACCTGTTTAGCTATATTTCCCTCGTT  
23P410;TAGATTTAGTTTGACGTAATCCA

23P102;AAGAAGTTTTGCCAGAGGGGGTAATAGATATAACAGTTGATTCATCTCTAC  
23P103;CTCATATCCTGGAAGTTTCATTCCTAAAATGT  
23P106;ACAAACGGTATTCATTGAATCCCCTAATGCTGTAGCTCAATTAAGCCA  
23P107;GCGTCAGTGCTTAATTGCTGAATACTCAAATG  
23P110;TTTAATTGCTCCTTTTCGCAAAG

23P202;AGGTCTTTACCCTGACTATTATAGTCAGCAAACCTCCAACAGGTAATTTTCT  
23P203;TCCACTTCGCGAACCAGACCGGAAGAAGCAAA  
23P206;TTAAATCATAATGCCGGAGAGGGTGTCTAGCTGATAAATTGCTTTAT  
23P207;CTCATCAGAATATGATATTCAACCAGCTATTT  
23P210;AAAGATTCAAAAGGGGAAGCGAT

23P302;GAGCAAACAAGAGAATCGATGAACGGTATTTTAAATGCAATGCTCATTTTT

23P303;ATTTGAGCTTTAGAACCCATATAATCGTAA  
23P306;TGCGATTTTGGGAAGAAAATCTATAATACTTTTGCGGGAGTCGGCTA  
23P307;CCTCAATCAAACATTATGACCCTGCGTTAATA  
23P310;ATTAAGCAATAAAGCTGGTTGAA

### **Bridges**

3101;CCCCTCAGCGGCAAAACGCTTCGCTTGGTCAA  
3102;ACCTACCGATTAATAATTTTTACCG  
3103;TTATAACCCATGATTAAACTCCTA  
3104;AAATAAAAGTCTGAAATCACACTC  
3105;ATCACGAAGTCATGATTTTGAATT  
3106;AAAAAAAGTGAATCGCGAGTGGTC  
3107;GCGATAAACAGAAGTGAGAACCAG  
3108;GAAGAAGCTGGAGTAACGGTCACA  
3109;AACCTGACTATTCCACCTGTAAAA  
3110;TTAGGTGTTGCAACAACCTGAACGG  
3111;CACTGGTCAAATATAACGTTGACG

3201;CGTCAAACAATCATGGTGGCGAAT  
3202;GTTCTTGCAAAACCACCATTACCA  
3203;TCTGAATGCAATGAAGAAATCACC  
3204;GTTCTTGAATGAATGGTTGACAGA  
3205;TAGCGGCGGAAGCCTTCAAGAAGG  
3206;AGGAGAAACAGCACCAACAGAAAC  
3207;GCATCAAAAAGCAATATCATACGAA  
3208;ACGATACCACTGACCCAAAAAATT  
3209;AACAGGCTCAGCAATCTTAAACT  
3210;GAATCACCACCGAAGAAGACTCAA

4101;GAAGAAATAACGGAAAACATCCTT  
4102;TTTCACGCTCATAAGAGGTTTTAC  
4103;AGGACGGTTGTCAGCGGGCGGCAA  
4104;ACAAAACAGGGTCGCCAGCGCATG  
4105;GAGATTAGAGCAATATCGGTATAA  
4106;ACCTTTAGATCAACATCATAGCCA  
4107;ACGTTTGGTCAGTTCCCGTTAAGG  
4108;CTCTTTAGTCGCAGTAGAAAACCTG  
4109;CACGACCAGGCGGAAAACGAACAA  
4110;GTAAACATCAGAATGTTTATAGGT  
4111;ACAAAGAAACGCGGCAAGTGCCATGCTCAGGA

3301;GGTAGTCGCATCATGGTAACGCTG  
3302;AATCACGTATAAACATCATAGGCA  
3303;GGCGACCATTCAAAGGTCTTGGTC  
3304;AATTAGCATAAGCAGCTAATAACC  
3305;TGACGGTATTGCAGACCCATAATG  
3306;TGTGGTAGGGACGTCAATAGTCAC

3307;CCCGGCGTACGGGGAAAAGTCGTC  
3308;AGAAAGCTCAGTCTCAAACATAAA  
3309;ATGAAACCGGAGGAAGCGGAGCAG  
3310;TTTTTGAGGTAGCGGTAAAGTTAG

3401;TAAGAGCTGGCAGCAACGGAAACC  
3402;CATCATCTAGTTGATGGCGAAAGG  
3403;TTTTGACAGAATCGTTTGATTAAG  
3404;GGTTAGCCTCGGTACGCATCCAAC  
3405;CTTCTCCTGTCAGGCATCCACGGC  
3406;ATAGTTGTGAACGTGCCAAGCATA  
3407;TAAACCAGTCCTTGACTATAGATA  
3408;ACCCTGAAACAAATGCAAATGTGA  
3409;CATGAACATTAGGGATTTTATTGG  
3410;TTAATCGTAAATGTCAACAAGAGA

4201;CAGTTTGACAAGAAAAGCGGCATG  
4202;AACCAGTAGGTCATGCGGCATACG  
4203;AAGCCAAGATGGGAAAGTGTTAAC  
4204;GAGGAGTGGCATTAAACAATCTGAC  
4205;AGACGACCACCATCCTTCATGAAC  
4206;CTGTTACACCCGGAGTAGTTGAAA  
4207;GGAGTCGCCAGCGATACATAAACG  
4208;AGGGACATAAAAAGTACGGCGTCC  
4209;AGCGCCAAAAAATGTCTACAGTAG  
4210;GCAAGGCCACGACGCAATGGAGAA

3501;CGCTCTTTATTAGACATAATTTAT  
3502;AAGGGGCCGCATCGGACTCAGATA  
3503;TATTAGTGGTTGAACAGAAGCCCC  
3504;AAATTGTTGACCACCTCTCATGAT  
3505;TAACTTGAACATACCAAAGACGAG  
3506;CGCTTGCCTCTGGAAACGTACGGA  
3507;ATAGAGGCCAAAGCGGTTTAGTAC  
3508;GGCTGCGGACGACCAGAGCCTGAA  
3509;ACGGCAGAGGCGAGCGCCAGAACG  
3510;CTTTAGACAAATCATCTTCGGTTA

3601;CGTCAGAATACATCACTCCTTCCG  
3602;TTTTGACGAGTAGCAATCCAAACT  
3603;GAGCACGAGAGCGGTCCACGTTTT  
3604;TCAGTAAGAACGTCAGGCCTCAAC  
3605;AAACGCAATGTTTCCTGCGCGTAC  
3606;TAAACGCGATCCCACAAAGTCCAG  
3607;GCAGGAAAGCGAGGGTAACAATTC  
3608;TAACCGGACGCTCGACAATAAACT

3609;ACGGCAGCGCCATTAATAATGTTT  
3610;TTCAGCGCACGGGATGAACATAAT  
3611;GGCCGTTTGAATGTTGCTTCCATGATGAGACA

2401;CATATCACGCGCAAGGATAGGTCCG  
2402;CATTTTCCAGCAGCCTTATGGCCG  
2403;CATCACGAACGTCAGAGCCAGCAG  
2404;GATTTAATTCGTAAACGTAACAGA  
2405;ACTTCTCAAAGCAGTAGTAATTCC  
2406;CAAGATAAAGCATTGTGCCAATTC  
2407;TGGGGGAGCACATTGTTTTTTCGA  
2408;AAATATCCGAAAGTGTGTTATTAA  
2409;TCTATAGTTAACTTCTGCGTCATG  
2410;AAAACCTTTTTTCGTCCCCTTCGG

2501;GGCGTGTGAGGTTGGATACGCCAA  
2502;ATCGAAGCCACACAAAAATACTGA  
2503;CTGTACCATACTCAGGGCGCATAA  
2504;AGATTTGTTCGTCACAGTGAAGACG  
2505;CATGGAAAGTTGCGCCGCCAAAAC  
2506;CAGTAACTGAAGTGTCCGCATAAA  
2507;TCAACGCTACCTGTAGTTTCCCAG  
2508;TCATCTCTCTTTTTGCACGACCAA  
2509;CGTACCCGGTTCTGCTTCAATATC  
2510;CGGCGTTCGAAGCTATTTAACTGGC

2601;CGTATTTTTTAACCCAGCTTGGTAA  
2602;AAGCACTCGGGCATACTGTAACCA  
2603;TGTAGCGAACTGCGATCGTGGACA  
2604;ATTGTGAGCATTTTCAGAAAAAGC  
2605;CAGAACGTTCCCGAAGTTGCGGGCT  
2606;TTCTGAACTAGCATCAACAGGCCA  
2607;TTAAGCGGCTCACCTTAGCTTCTT  
2608;GCGACAGCTTGGTTTTTCATATAAC  
2609;CCAACAGCTAGTGAGTTGTTCCAT  
2610;TCCTAGACTTAACGTATTTAGCCA  
2611;CATATCTGACTTTTTGCTTTAGCAGCAAGGTC

1201;TAAAAACCTCATTAGCCTTGCGAC  
1202;GCAAGAACCTGCGTAACCGTCTTC  
1203;CCAGCTTGCGGCAAACATACGAC  
1204;CGAAAATAGTCACGCAAGAGGGCG  
1205;TATCCTTAAAGCATTGGGATTATC  
1206;CCTCTAATTGGGGTAATTATACTC  
1207;TTAATACCTTTCTTTTCGGTCGTC  
1208;TGAGAGTGTCAAAAACCTTGAAC



1209;TCCAGCAAGATAAAACCAACCATCA  
1210;CTGTCGCACTACGCGATTTTCATAG  
1211;CTGAATAGCAAAGCCTTTGCATTCATCAAACG

2301;CCAATCCGTTATCGAACTCAACGC  
2302;CGAAAAGACTTTAATAACCTGATT  
2303;TGGAGACAAATAATCTCAGAATCT  
2304;AGCTTGATGCGGTTATACCTCACT  
2305;CATAAATCCCATCTGCTTATGGAA  
2306;TTGGGGATAATAACCGCCAGCAATA  
2307;CAGCAAGAGCAGAAGCTGAGAAAG  
2308;TGCCACAAGCCTCAATTTAGACAT  
2309;CAAACAATAGCAGGTTTAAGAGCC  
2310;CTCAAAGTCGGAGGCGGCTTTTTG

1101;AAGTCAACAAATAATCAGCGTGAC  
1102;GGGTAATATGATTCTGCGTTTGCT  
1103;AGAAGAGCCATACCGCAGAACGAA  
1104;AAGCCTCCAAGATTTGCAGTAGCG  
1105;ATCCTTTGGAGGCATGAAAACATA  
1106;AGGGTGTCAGCATCAGTGACGACA  
1107;CAACCACACCAGAAGCAATCCTGA  
1108;TCCTAGACAAATTAGAATACCATG  
1109;CTTTATCAGCCAATACCATCAGCT  
1110;TTTCCAGAAATTGTTCCAAGTATC

2201;TGAATGCCCAGCACTAACCTTGCG  
2202;CTTTGATTTTATCGGTAGCAAGCA  
2203;CATGCCTACAGTATTGTGGTCATT  
2204;ACTGACCAGCCGTTTGTAATACCA  
2205;GGCAGATTAGCTTGAGTAAGCATT  
2206;AATCTCGGGTTAGGAACATTAGAG  
2207;GGGCGGCCTCATCAGGAAACCTGC  
2208;GGAAAGATTGGTGTTTCCAGAAAC  
2209;CCATAGCATCCATAATAGACGCAA  
2210;GTAGACTCCAAGAAGTCCTTTACC

2101;TGCAACGTTCTGTTGATAAGCAAG  
2102;TTTGTGCATCAGAAACGGCAGAAG  
2103;CAAATCAAGCAACTTATATACCTG  
2104;TATTCTGGCGTGAAGTTGCCACCA  
2105;GGCAGACTCGCCGACTGAATGCCA  
2106;TTTTTGAGACGAGTATCCTTTCT  
2107;CAGCAGCAAGATAATCTCTCATTT  
2108;GGCAATCTCTTTCTGATTAAGCTC  
2109;CCCAAGCATTGTCCAGTTGCATTT

2110;TCTTTTGGAGGAAGCATCAGCACC  
2111;TCAACCATAACCAGCAGATTCTCAAATCCGGCG
